# Supplementary material for: How much can we trust GPS wildlife tracking? An assessment in semi-free-ranging Crested Ibis Nipponia nippon
Source: PeerJ. 2018 Jul 24;6:e5320. doi: 10.7717/peerj.5320 (PMC6063208; doi:10.7717/peerj.5320)
Supplement: Data S1 [file peerj-06-5320-s001.xlsx]

## Sheet: DZ
	PTT	Date	Time	Longitude	Latitude	Altitude	Temperature	Volt	LC	Positioning error
1	3864AF2DE	20140811	8:01:19	114.28	31.9677	106	25.24	3.985	B	38.72
2	3864AF2DE	20140811	7:00:53	114.28	31.9679	131	22	3.986	B	18.2
3	3864AF2DE	20140811	6:01:41	114.279	31.968	146	24.24	3.988	C	21.03
4	3864AF2DE	20140811	5:01:42	114.279	31.9681	127	21	3.99	C	22.52
5	3864AF2DE	20140811	4:01:12	114.279	31.9681	110	21	3.992	B	20.81
6	3864AF2DE	20140810	22:00:55	114.279	31.968	130	21	3.999	B	18.82
7	3864AF2DE	20140810	21:01:03	114.279	31.9681	145	22	4.001	B	5.63
8	3864AF2DE	20140810	20:01:13	114.279	31.968	98	21.24	4.003	B	19.75
9	3864AF2DE	20140810	19:00:59	114.279	31.968	121	21	4.004	B	18.82
10	3864AF2DE	20140810	18:01:03	114.279	31.9679	122	24	4.006	B	24.75
11	3864AF2DE	20140810	7:01:28	114.28	31.9679	131	24.24	4.01	B	23.06
12	3864AF2DE	20140810	6:00:59	114.279	31.968	119	23.24	4.011	B	20.54
13	3864AF2DE	20140810	5:01:12	114.279	31.968	103	25	4.013	B	31.32
14	3864AF2DE	20140810	4:00:51	114.279	31.9681	119	25.24	4.014	B	20.61
15	3864AF2DE	20140810	3:01:00	114.279	31.9681	127	25.24	4.016	B	11.44
16	3864AF2DE	20140810	2:00:56	114.279	31.9681	120	25.24	4.017	B	18.92
17	3864AF2DE	20140810	1:01:12	114.279	31.968	121	20	4.018	B	17.92
18	3864AF2DE	20140810	0:01:20	114.279	31.968	94	20.24	4.02	B	32.39
19	3864AF2DE	20140809	23:00:55	114.279	31.968	122	25	4.022	B	17.58
20	3864AF2DE	20140809	22:00:54	114.279	31.968	135	25.24	4.023	B	17.56
21	3864AF2DE	20140809	21:01:12	114.279	31.9681	134	25.24	4.024	B	14.89
22	3864AF2DE	20140809	20:02:19	114.282	31.9688	451	20	4.028	C	226.3
23	3864AF2DE	20140809	19:00:54	114.279	31.9679	86	25.24	4.03	B	18.26
24	3864AF2DE	20140809	18:01:09	114.28	31.968	127	25.24	4.031	B	13.18
25	3864AF2DE	20140809	17:00:53	114.28	31.9679	133	20	4.033	B	19.7
26	3864AF2DE	20140809	16:01:11	114.28	31.9679	115	21	4.035	B	19.83
27	3864AF2DE	20140809	15:03:12	114.279	31.968	115	21.24	4.04	D	11.78
28	3864AF2DE	20140809	14:01:00	114.279	31.9681	123	20.24	4.041	B	13.3
29	3864AF2DE	20140809	13:00:50	114.28	31.968	122	25.24	4.041	B	8.97
30	3864AF2DE	20140809	12:01:06	114.28	31.9679	156	21	4.041	B	25.56
31	3864AF2DE	20140809	11:00:59	114.279	31.9681	101	21	4.041	B	24.43
32	3864AF2DE	20140809	10:01:11	114.279	31.968	125	20	4.042	B	20.1
33	3864AF2DE	20140809	9:01:11	114.279	31.968	98	20	4.049	B	20.99
34	3864AF2DE	20140809	8:02:29	114.279	31.968	122	21	4.053	C	20.54
35	3864AF2DE	20140809	7:01:20	114.279	31.9681	125	20.24	4.055	B	20.81
36	3864AF2DE	20140809	6:01:12	114.279	31.9679	147	20	4.057	B	18.73
37	3864AF2DE	20140809	5:01:13	114.279	31.968	77	20	4.059	B	16.22
38	3864AF2DE	20140809	4:01:12	114.279	31.968	99	20	4.061	B	21.03
39	3864AF2DE	20140809	3:00:55	114.279	31.968	107	20	4.062	B	34.2
40	3864AF2DE	20140809	2:01:12	114.279	31.9681	119	21	4.064	B	20.78
41	3864AF2DE	20140809	1:00:51	114.279	31.968	87	20	4.065	B	27.34
42	3864AF2DE	20140809	0:01:22	114.279	31.9681	123	20.24	4.067	B	13.52
43	3864AF2DE	20140808	23:00:59	114.279	31.9681	113	22	4.068	B	16.86
44	3864AF2DE	20140808	22:01:13	114.279	31.9679	145	22	4.071	B	20
45	3864AF2DE	20140808	21:00:54	114.279	31.9681	134	21.24	4.072	B	15.12
46	3864AF2DE	20140808	20:01:09	114.28	31.968	234	21.24	4.074	B	13.39
47	3864AF2DE	20140808	19:01:30	114.279	31.968	120	22.24	4.077	B	17.56
48	3864AF2DE	20140808	18:00:55	114.28	31.9679	140	23	4.078	B	22.02
49	3864AF2DE	20140808	17:01:11	114.28	31.9679	124	23.24	4.08	B	25.15
50	3864AF2DE	20140808	16:00:49	114.279	31.9678	106	25	4.081	B	30.24
51	3864AF2DE	20140808	15:00:49	114.28	31.968	124	25.24	4.08	B	12.36
52	3864AF2DE	20140808	14:01:11	114.279	31.9679	115	25	4.078	B	14.51
53	3864AF2DE	20140808	13:00:55	114.28	31.9679	124	25	4.076	B	18.2
54	3864AF2DE	20140808	12:12:20	114.279	31.9678	109	24	4.075	D	34.41
55	3864AF2DE	20140808	11:00:55	114.28	31.9679	115	23	4.076	B	18.58
56	3864AF2DE	20140808	9:01:11	114.28	31.9679	127	22.24	4.08	B	14.28
57	3864AF2DE	20140808	8:02:00	114.28	31.9679	132	21	4.082	C	20.23
58	3864AF2DE	20140808	7:00:56	114.28	31.9679	133	25.24	4.084	B	18.72
59	3864AF2DE	20140808	6:01:12	114.28	31.9679	144	24	4.085	B	16.87
60	3864AF2DE	20140808	5:00:54	114.279	31.9679	112	25.24	4.087	B	16.86
61	3864AF2DE	20140808	4:00:50	114.279	31.968	124	24.24	4.088	B	11.96
62	3864AF2DE	20140808	3:00:54	114.28	31.9679	135	24.24	4.09	B	23.43
63	3864AF2DE	20140808	2:00:56	114.28	31.9679	120	24.24	4.091	B	20.62
64	3864AF2DE	20140808	1:00:55	114.28	31.968	121	24	4.092	B	12.99
65	3864AF2DE	20140808	0:01:09	114.279	31.9677	0	24.24	4.094	B	103.59
66	3864AF2DE	20140807	23:00:47	114.28	31.9679	117	23.24	4.095	B	17.46
67	3864AF2DE	20140807	22:11:55	114.28	31.9679	114	24.24	4.096	D	16.34
68	3864AF2DE	20140807	21:01:12	114.28	31.9679	141	20.24	4.1	B	27.69
69	3864AF2DE	20140807	20:01:30	114.28	31.9678	122	20.24	4.103	B	25.64
70	3864AF2DE	20140807	19:01:13	114.28	31.9679	111	22.24	4.105	B	16.87
71	3864AF2DE	20140807	18:01:00	114.28	31.9679	112	23	4.107	B	16.22
72	3864AF2DE	20140807	17:01:11	114.28	31.9679	145	24.24	4.109	B	26.14
73	3864AF2DE	20140807	16:00:56	114.28	31.968	148	24	4.11	B	11.18
74	3864AF2DE	20140807	15:01:13	114.279	31.9679	107	20	4.112	B	17.87
75	3864AF2DE	20140807	14:00:46	114.28	31.9679	119	25	4.113	B	14.71
76	3864AF2DE	20140807	13:00:56	114.28	31.9681	110	20.24	4.111	B	32.82
77	3864AF2DE	20140807	12:00:59	114.279	31.9679	124	25.24	4.111	B	22.57
78	3864AF2DE	20140807	11:01:11	114.279	31.968	97	25	4.112	B	10.5
79	3864AF2DE	20140807	10:01:11	114.28	31.9681	111	24.24	4.113	B	12.18
80	3864AF2DE	20140807	9:01:11	114.279	31.968	85	23	4.119	B	13.96
81	3864AF2DE	20140807	8:01:53	114.28	31.9683	153	24	4.121	C	36.46
82	3864AF2DE	20140807	7:01:09	114.28	31.9679	123	22.24	4.124	B	23.06
83	3864AF2DE	20140807	6:00:54	114.28	31.9679	140	22.24	4.125	B	24.53
84	3864AF2DE	20140807	5:00:54	114.28	31.9679	116	22.24	4.127	B	15.79
85	3864AF2DE	20140807	4:01:06	114.279	31.9679	97	22	4.129	B	18.82
86	3864AF2DE	20140807	3:00:44	114.28	31.9679	125	22	4.129	A	17.61
87	3864AF2DE	20140807	2:00:58	114.28	31.9679	123	24.24	4.131	B	19.04
88	3864AF2DE	20140807	1:00:49	114.279	31.9679	119	24	4.132	B	18.9
89	3864AF2DE	20140807	0:00:54	114.28	31.968	134	23.24	4.134	B	11.4
90	3864AF2DE	20140806	23:00:55	114.28	31.968	122	20	4.135	B	12.99
91	3864AF2DE	20140806	22:00:55	114.279	31.9679	114	21.24	4.137	B	16.41
92	3864AF2DE	20140806	21:01:12	114.279	31.9679	105	22.24	4.139	B	15.08
93	3864AF2DE	20140806	20:01:19	114.279	31.9674	43	23	4.141	B	83.41
94	3864AF2DE	20140806	19:01:12	114.28	31.9679	127	22.24	4.144	B	20.62
95	3864AF2DE	20140806	18:01:06	114.28	31.9679	130	22	4.146	B	23.06
96	3864AF2DE	20140806	17:01:13	114.28	31.9679	137	23.24	4.148	B	18.58
97	3864AF2DE	20140806	16:00:58	114.279	31.9678	99	23.24	4.15	B	26.63
98	3864AF2DE	20140806	15:01:31	114.28	31.9679	99	26	4.152	C	20.82
99	3864AF2DE	20140806	14:00:56	114.28	31.9681	107	27	4.153	B	8.87
100	3864AF2DE	20140806	13:01:01	114.28	31.968	130	24.24	4.153	B	12.58
101	3864AF2DE	20140806	12:00:57	114.28	31.9679	133	24	4.153	B	24.53
102	3864AF2DE	20140806	11:01:26	114.279	31.9679	102	25.24	4.154	B	24.75
103	3864AF2DE	20140806	10:01:45	114.279	31.9682	151	24.24	4.156	C	29.89
104	3864AF2DE	20140806	9:01:11	114.279	31.9679	117	24	4.165	B	17.92
105	3864AF2DE	20140806	8:02:00	114.28	31.968	106	24	4.169	C	12.37
106	3864AF2DE	20140806	7:01:12	114.28	31.9677	136	22	4.172	B	40.03
107	3864AF2DE	20140806	6:01:12	114.28	31.9679	135	22.24	4.174	B	19.11
108	3864AF2DE	20140806	5:01:12	114.28	31.9679	127	22	4.176	B	21.06
109	3864AF2DE	20140806	4:00:55	114.28	31.9679	151	23	4.178	B	22.33
110	3864AF2DE	20140806	3:00:53	114.28	31.9679	159	22.24	4.18	B	18.49
111	3864AF2DE	20140806	2:01:01	114.28	31.968	126	22	4.182	B	14.31
112	3864AF2DE	20140806	1:00:52	114.28	31.968	154	22.24	4.184	B	7.99
113	3864AF2DE	20140806	0:00:54	114.28	31.9679	121	23	4.186	B	18.17
114	3864AF2DE	20140805	23:00:48	114.28	31.9679	125	22	4.187	B	18.49
115	3864AF2DE	20140805	22:01:12	114.28	31.968	98	23.24	4.19	B	16.34
116	3864AF2DE	20140805	21:01:19	114.279	31.9678	131	23	4.193	B	28.85
117	3864AF2DE	20140805	20:01:12	114.28	31.9677	122	23	4.195	B	37.6
118	3864AF2DE	20140805	19:00:55	114.279	31.9679	101	23.24	4.198	B	17.79
119	3864AF2DE	20140805	18:01:22	114.279	31.9679	159	24.24	4.201	B	33.77
120	3864AF2DE	20140805	17:01:08	114.28	31.9681	110	25.24	4.203	B	19.83
121	3864AF2DE	20140805	16:02:06	114.28	31.9681	148	25	4.208	C	2.33
122	3864AF2DE	20140805	15:01:13	114.279	31.9683	108	27.24	4.209	B	28.35
123	3864AF2DE	20140805	14:00:55	114.279	31.9682	122	25.24	4.203	B	20.69
124	3864AF2DE	20140805	13:00:52	114.28	31.9679	120	23	4.3	B	29.42
125	3864AF2DE	20140805	12:00:58	114.28	31.9679	118	20	4.201	B	22.05
126	3864AF2DE	20140805	11:01:13	114.28	31.9679	113	30	4.199	B	27.81
127	3864AF2DE	20140805	10:01:43	114.279	31.9681	133	30	4.198	C	12.98
128	3864AF2DE	20140805	9:01:49	114.279	31.968	115	29.24	4.207	C	17.58
129	3864AF2DE	20140805	8:02:12	114.28	31.9683	168	27.24	4.209	C	23.87
130	3864AF2DE	20140805	7:01:22	114.28	31.968	133	24.24	4.212	B	14.31
131	3864AF2DE	20140805	6:01:20	114.279	31.9681	155	22	4.216	B	13.88
132	3864AF2DE	20140805	5:01:42	114.279	31.9681	112	22	4.221	C	37.97
133	3864AF2DE	20140805	4:03:14	114.28	31.9681	164	24	4.231	D	20.07
134	3864AF2DE	20140805	3:01:04	114.279	31.9683	151	22.24	4.234	B	20.19
135	3864AF2DE	20140805	2:01:45	114.279	31.9679	143	23	4.24	C	30.41
136	3864AF2DE	20140805	1:01:12	114.279	31.968	125	23.24	4.244	B	18.82
137	3864AF2DE	20140805	0:01:12	114.279	31.9681	104	23	4.248	B	22.7
138	3864AF2DE	20140804	23:01:23	114.279	31.9678	111	24	4.253	B	25.34
139	3864AF2DE	20140804	22:00:55	114.279	31.9679	120	23.24	4.257	B	26.36
140	3864AF2DE	20140804	21:00:57	114.279	31.968	170	23	4.26	B	10.35
141	3864AF2DE	20140804	20:01:12	114.279	31.968	149	23.24	4.265	B	25.51
142	3864AF2DE	20140804	19:01:00	114.279	31.968	101	24	4.27	B	24.96
143	3864AF2DE	20140804	18:01:47	114.28	31.9678	107	27	4.278	C	34.24
144	3864AF2DE	20140804	17:01:11	114.28	31.9676	145	29	4.284	B	50.68
145	3864AF2DE	20140804	16:00:56	114.279	31.9678	103	29	4.288	B	31.72
146	3864AF2DE	20140804	15:01:42	114.28	31.9679	85	33.24	4.298	C	16.4
147	3864AF2DE	20140804	14:01:36	114.28	31.968	95	37	4.295	C	15.25
148	3864AF2DE	20140804	13:01:05	114.28	31.9681	160	37.24	4.27	B	8.59
149	3864AF2DE	20140804	12:00:59	114.279	31.9682	121	34.24	4.245	B	20.93
150	3864AF2DE	20140804	11:01:11	114.28	31.9681	104	34	4.226	B	27.53
151	3864AF2DE	20140804	10:00:53	114.28	31.9681	89	35.24	4.215	B	13.75
152	3864AF2DE	20140804	9:01:23	114.279	31.968	93	27	4.224	B	12.35
153	3864AF2DE	20140804	8:01:05	114.279	31.968	109	28.24	4.224	B	17.92
154	3864AF2DE	20140804	7:01:11	114.28	31.9679	182	23.24	4.225	B	41.04
155	3864AF2DE	20140804	6:01:22	114.279	31.968	135	22	4.228	B	12
156	3864AF2DE	20140804	5:01:12	114.279	31.9678	72	22	4.231	B	26.94
157	3864AF2DE	20140804	4:01:43	114.279	31.9678	111	23	4.237	C	26.63
158	3864AF2DE	20140804	3:00:55	114.28	31.968	129	21.24	4.24	B	12.99
159	3864AF2DE	20140804	2:01:12	114.28	31.9679	104	22	4.244	B	14.28
160	3864AF2DE	20140804	1:00:55	114.28	31.9681	145	22	4.247	B	2.93
161	3864AF2DE	20140804	0:01:17	114.28	31.9679	121	22	4.252	B	24.28
162	3864AF2DE	20140803	23:01:13	114.28	31.968	119	22	4.256	B	8.51
163	3864AF2DE	20140803	22:01:22	114.28	31.968	130	22	4.262	B	11.87
164	3864AF2DE	20140803	21:01:12	114.28	31.9679	139	22.24	4.267	B	17.44
165	3864AF2DE	20140803	20:00:55	114.279	31.9681	138	23	4.271	B	9.54
166	3864AF2DE	20140803	19:00:55	114.279	31.9681	105	24.24	4.275	B	17.04
167	3864AF2DE	20140803	18:00:57	114.28	31.968	125	27	4.28	B	29.92
168	3864AF2DE	20140803	17:01:37	114.279	31.968	117	28.24	4.288	C	9.17
169	3864AF2DE	20140803	16:00:55	114.28	31.968	99	27.24	4.285	B	24.42
170	3864AF2DE	20140803	15:01:11	114.279	31.9679	98	24.24	4.288	B	19.99
171	3864AF2DE	20140803	14:00:58	114.28	31.9683	106	36.24	4.269	B	26.96
172	3864AF2DE	20140803	13:02:36	114.28	31.9683	189	39	4.254	C	65.49
173	3864AF2DE	20140803	12:01:08	114.28	31.9678	189	29.24	4.242	B	57.06
174	3864AF2DE	20140803	11:00:50	114.279	31.9681	103	37.24	4.236	B	16.06
175	3864AF2DE	20140803	10:01:11	114.28	31.9682	101	35.24	4.216	B	11.32
176	3864AF2DE	20140803	9:01:42	114.28	31.9684	113	30	4.206	C	44.33
177	3864AF2DE	20140803	8:02:00	114.28	31.9678	89	28.24	4.208	C	26.51
178	3864AF2DE	20140803	7:01:02	114.28	31.9681	129	22.24	4.207	B	29.25
179	3864AF2DE	20140803	6:02:06	114.279	31.968	132	21.24	4.212	C	21.56
180	3864AF2DE	20140803	5:00:59	114.279	31.9682	150	21.24	4.215	B	19
181	3864AF2DE	20140803	4:00:53	114.279	31.968	135	22	4.217	B	15.51
182	3864AF2DE	20140803	3:00:53	114.279	31.9681	107	22	4.219	B	20.81
183	3864AF2DE	20140803	2:01:12	114.279	31.9681	123	22.24	4.223	B	16.8
184	3864AF2DE	20140803	1:02:30	114.279	31.9679	141	23.24	4.23	C	30.41
185	3864AF2DE	20140803	0:01:49	114.279	31.9679	109	23	4.236	C	21.28
186	3864AF2DE	20140802	23:01:16	114.279	31.968	139	22	4.24	B	19.93
187	3864AF2DE	20140802	22:00:58	114.28	31.9681	156	22.24	4.243	B	5.66
188	3864AF2DE	20140802	21:01:36	114.279	31.968	138	23.24	4.249	C	15.42
189	3864AF2DE	20140802	20:00:55	114.279	31.9682	113	23.24	4.252	B	22.21
190	3864AF2DE	20140802	19:00:55	114.279	31.9682	99	24.24	4.256	B	30.98
191	3864AF2DE	20140802	18:02:11	114.279	31.968	102	28	4.266	C	19.13
192	3864AF2DE	20140802	17:01:58	114.28	31.9679	108	28	4.272	C	24.28
193	3864AF2DE	20140802	16:01:11	114.28	31.968	163	28.24	4.277	B	32.05
194	3864AF2DE	20140802	15:00:59	114.279	31.9682	95	30.24	4.273	B	25.43
195	3864AF2DE	20140802	14:01:13	114.28	31.968	121	28.24	4.261	B	9.89
196	3864AF2DE	20140802	13:00:49	114.279	31.9682	121	34	4.257	B	25.48
197	3864AF2DE	20140802	12:01:11	114.28	31.968	131	29.24	4.236	B	8.97
198	3864AF2DE	20140802	11:01:03	114.28	31.9679	103	28	4.236	B	24.53
199	3864AF2DE	20140802	10:00:55	114.28	31.968	126	34.24	4.232	B	8.49
200	3864AF2DE	20140802	9:01:42	114.28	31.968	99	28.24	4.228	C	8.51
201	3864AF2DE	20140802	8:01:03	114.28	31.968	133	24.24	4.226	B	43.69
202	3864AF2DE	20140802	7:01:12	114.28	31.9679	136	23	4.229	B	23.35
203	3864AF2DE	20140802	6:01:30	114.279	31.9679	124	22.24	4.234	B	21.28
204	3864AF2DE	20140802	5:01:21	114.279	31.9679	62	23	4.238	B	47.75
205	3864AF2DE	20140802	4:01:36	114.28	31.968	132	23.24	4.244	C	9.89
206	3864AF2DE	20140802	3:01:05	114.279	31.9681	136	23	4.247	B	5.36
207	3864AF2DE	20140802	2:01:12	114.279	31.9679	121	22.24	4.252	B	16.86
208	3864AF2DE	20140802	1:01:16	114.279	31.968	116	23	4.256	B	5.29
209	3864AF2DE	20140802	0:00:54	114.279	31.9681	125	23	4.26	B	9.17
210	3864AF2DE	20140801	23:00:54	114.279	31.968	101	22	4.263	B	11.28
211	3864AF2DE	20140801	22:00:52	114.279	31.9679	113	22	4.267	B	19.16
212	3864AF2DE	20140801	21:01:42	114.279	31.9684	167	23	4.274	C	39.97
213	3864AF2DE	20140801	20:00:51	114.279	31.968	118	22.24	4.278	B	9.11
214	3864AF2DE	20140801	19:01:12	114.279	31.968	107	23.24	4.284	B	14.87
215	3864AF2DE	20140801	18:00:54	114.28	31.968	114	23.24	4.289	B	16.16
216	3864AF2DE	20140801	17:01:06	114.28	31.9679	142	24	4.295	B	17.2
217	3864AF2DE	20140801	16:01:04	114.279	31.9679	105	22	4.299	B	26.58
218	3864AF2DE	20140801	15:00:52	114.279	31.9683	113	29.24	4.301	B	29.76
219	3864AF2DE	20140801	14:01:05	114.279	31.968	110	30.24	4.291	B	10.22
220	3864AF2DE	20140801	13:00:56	114.279	31.9682	151	32.24	4.278	B	15.07
221	3864AF2DE	20140801	12:01:11	114.279	31.9678	110	34.24	4.272	B	29.42
222	3864AF2DE	20140801	11:00:59	114.279	31.9682	97	32	4.258	B	22.02
223	3864AF2DE	20140801	10:00:55	114.279	31.9679	114	27.24	4.246	B	20.71
224	3864AF2DE	20140801	9:01:11	114.28	31.9679	131	28	4.252	B	16.22
225	3864AF2DE	20140801	8:01:19	114.28	31.9681	107	24.24	4.25	B	21.93
226	3864AF2DE	20140801	7:01:12	114.279	31.9681	114	23	4.253	B	19.08
227	3864AF2DE	20140801	6:01:14	114.279	31.968	149	21.24	4.258	B	19.35
228	3864AF2DE	20140801	5:01:43	114.279	31.968	160	22	4.265	C	22.87
229	3864AF2DE	20140801	4:00:55	114.279	31.9681	138	21	4.269	B	18.92
230	3864AF2DE	20140801	3:00:54	114.279	31.9681	120	21.24	4.272	B	22.7
231	3864AF2DE	20140801	2:01:12	114.279	31.9681	124	21.24	4.278	B	24.49
232	3864AF2DE	20140801	1:00:58	114.279	31.9682	100	21.24	4.282	B	30.98
233	3864AF2DE	20140801	0:00:56	114.279	31.9681	115	21.24	4.286	B	20.61
234	3864AF2DE	20140731	23:00:55	114.279	31.968	125	22	4.291	B	15.42
235	3864AF2DE	20140731	22:01:13	114.279	31.9681	132	22.24	4.297	B	14.99
236	3864AF2DE	20140731	21:01:03	114.279	31.9681	134	22.24	4.302	B	20.95
237	3864AF2DE	20140731	20:00:55	114.279	31.9681	128	23	4.307	B	18.89
238	3864AF2DE	20140731	19:01:12	114.279	31.9679	122	25	4.313	B	19.75
239	3864AF2DE	20140731	18:00:58	114.28	31.9681	145	27	4.317	B	7.36
240	3864AF2DE	20140731	17:01:41	114.28	31.9679	140	28.24	4.325	C	20.23
241	3864AF2DE	20140731	16:01:01	114.279	31.9678	99	28.24	4.325	B	35.15
242	3864AF2DE	20140731	15:00:56	114.279	31.968	119	30	4.324	B	19.35
243	3864AF2DE	20140731	14:01:38	114.279	31.9681	129	30.24	4.325	C	13.18
244	3864AF2DE	20140731	13:01:07	114.279	31.9683	123	34.24	4.301	B	30.51
245	3864AF2DE	20140731	12:00:54	114.28	31.9679	126	28	4.271	B	19.55
246	3864AF2DE	20140731	11:01:40	114.279	31.9681	106	34	4.269	C	11.09
247	3864AF2DE	20140731	10:00:59	114.279	31.9682	100	34	4.244	B	32.31
248	3864AF2DE	20140731	9:01:45	114.28	31.9681	88	27.24	4.247	C	29.12
249	3864AF2DE	20140731	8:01:42	114.279	31.968	108	24.24	4.244	C	15.42
250	3864AF2DE	20140731	7:01:32	114.279	31.9681	136	23.24	4.247	C	5.13
251	3864AF2DE	20140731	6:00:57	114.279	31.9677	103	21.24	4.248	B	41.3
252	3864AF2DE	20140731	5:01:12	114.28	31.9678	89	21.24	4.252	B	30.82
253	3864AF2DE	20140731	4:01:42	114.28	31.968	161	22.24	4.259	C	6.64
254	3864AF2DE	20140731	3:01:12	114.279	31.9679	127	22	4.264	B	18.89
255	3864AF2DE	20140731	2:00:55	114.28	31.9679	123	21.24	4.268	B	20.62
256	3864AF2DE	20140731	1:01:12	114.28	31.968	138	21.24	4.273	B	10.71
257	3864AF2DE	20140731	0:01:03	114.28	31.9678	155	22.24	4.277	B	35.52
258	3864AF2DE	20140730	23:00:55	114.28	31.968	125	21	4.281	B	10.98
259	3864AF2DE	20140730	22:00:55	114.28	31.9679	125	21.24	4.286	B	18.72
260	3864AF2DE	20140730	21:00:55	114.28	31.9679	148	20	4.29	B	19.04
261	3864AF2DE	20140730	20:01:05	114.279	31.9679	115	20.24	4.295	B	18.26
262	3864AF2DE	20140730	19:00:55	114.279	31.9678	106	23.24	4.299	B	27.57
263	3864AF2DE	20140730	18:00:55	114.28	31.9679	124	23.24	4.303	B	17.24
264	3864AF2DE	20140730	17:02:04	114.28	31.9679	145	27.24	4.313	C	27.86
266	3864AF2DE	20140730	15:01:29	114.28	31.9679	158	26	4.208	B	29.87
267	3864AF2DE	20140730	14:01:13	114.279	31.9682	139	34.24	4.367	B	23.63
268	3864AF2DE	20140730	13:00:59	114.28	31.968	110	33.24	4.335	B	11.4
269	3864AF2DE	20140730	12:01:19	114.28	31.9679	118	33	4.325	B	15.22
270	3864AF2DE	20140730	11:01:11	114.279	31.9681	126	37.24	4.312	B	32.84
271	3864AF2DE	20140730	10:01:13	114.28	31.9679	107	30.24	4.276	B	24.94
272	3864AF2DE	20140730	9:01:17	114.28	31.9679	102	32.24	4.27	B	25.6
273	3864AF2DE	20140730	8:03:00	114.279	31.968	116	27.24	4.271	C	9.74
274	3864AF2DE	20140730	7:01:32	114.28	31.968	163	24	4.276	C	27.39
275	3864AF2DE	20140730	6:01:30	114.28	31.9679	128	23	4.283	B	24.17
276	3864AF2DE	20140730	5:00:54	114.279	31.968	116	22.24	4.287	B	12.05
277	3864AF2DE	20140730	4:00:48	114.28	31.968	163	22.24	4.291	B	18.37
278	3864AF2DE	20140730	3:01:08	114.279	31.9679	98	22.24	4.297	B	16.69
279	3864AF2DE	20140730	2:00:56	114.28	31.9679	113	22.24	4.301	B	19.7
280	3864AF2DE	20140730	1:00:55	114.28	31.9679	124	22.24	4.306	B	14.71
281	3864AF2DE	20140730	0:00:54	114.28	31.9681	148	22.24	4.31	B	13.83
282	3864AF2DE	20140729	23:01:38	114.28	31.9679	100	23.24	4.318	C	26.38
283	3864AF2DE	20140729	22:00:59	114.28	31.968	143	23	4.323	B	12.99
284	3864AF2DE	20140729	21:01:13	114.28	31.968	130	23.24	4.328	B	11.4
285	3864AF2DE	20140729	20:00:54	114.28	31.9679	127	24	4.331	B	16.34
286	3864AF2DE	20140729	19:00:55	114.28	31.9678	95	25	4.335	B	27.62
287	3864AF2DE	20140729	18:01:13	114.28	31.9679	103	28.24	4.339	B	17.46
288	3864AF2DE	20140729	17:01:29	114.279	31.9679	131	30	4.271	B	20.99
289	3864AF2DE	20140729	16:01:14	114.279	31.9681	90	31	4.36	B	19.65
290	3864AF2DE	20140729	15:00:54	114.28	31.9683	75	35	4.369	B	31.27
291	3864AF2DE	20140729	14:01:34	114.279	31.9681	116	33	4.318	C	16.06
292	3864AF2DE	20140729	13:00:58	114.28	31.9682	159	34.24	4.342	B	18.49
293	3864AF2DE	20140729	12:01:01	114.279	31.9682	125	34	4.341	B	20.93
294	3864AF2DE	20140729	11:01:19	114.279	31.9682	107	37	4.331	B	25.48
295	3864AF2DE	20140729	9:01:17	114.28	31.968	129	32.24	4.294	B	12.58
296	3864AF2DE	20140729	8:00:54	114.28	31.9679	139	27	4.278	B	19.55
297	3864AF2DE	20140729	7:01:24	114.28	31.968	129	25.24	4.277	B	17.81
298	3864AF2DE	20140729	6:01:12	114.28	31.9679	118	22	4.28	B	16.87
299	3864AF2DE	20140729	5:01:09	114.279	31.9679	118	21.24	4.285	B	16.86
300	3864AF2DE	20140729	4:00:57	114.28	31.968	129	21.24	4.289	B	10.98
301	3864AF2DE	20140729	3:01:13	114.279	31.9679	4	22	4.295	B	91.94
302	3864AF2DE	20140729	2:00:55	114.279	31.9677	125	21.24	4.3	B	52.78
303	3864AF2DE	20140729	1:00:55	114.279	31.9678	116	20.24	4.304	B	25.52
304	3864AF2DE	20140729	0:00:45	114.28	31.9679	112	20	4.307	A	17.46
305	3864AF2DE	20140728	23:00:54	114.28	31.9679	141	21	4.311	B	27.21
306	3864AF2DE	20140728	22:01:09	114.28	31.968	130	21.24	4.317	B	10.98
307	3864AF2DE	20140728	21:01:39	114.28	31.9686	239	22.24	4.325	C	69.27
308	3864AF2DE	20140728	20:00:55	114.28	31.9679	121	22	4.329	B	17.61
309	3864AF2DE	20140728	19:01:06	114.28	31.9679	131	23.24	4.334	B	19.11
310	3864AF2DE	20140728	18:01:10	114.279	31.9688	146	26.24	4.338	B	78.96
311	3864AF2DE	20140728	17:01:06	114.283	31.9748	684	28.24	4.34	B	805.82
312	3864AF2DE	20140728	16:01:32	114.28	31.968	145	30.24	4.358	C	88.79
313	3864AF2DE	20140728	15:01:11	114.28	31.9681	169	33.24	4.266	B	12.81
314	3864AF2DE	20140728	14:00:54	114.279	31.9683	96	35	4.368	B	39.14
315	3864AF2DE	20140728	13:00:54	114.28	31.9683	120	33.24	4.336	B	34.93
316	3864AF2DE	20140728	12:01:01	114.279	31.9679	123	32.24	4.326	B	25.85
317	3864AF2DE	20140728	11:00:54	114.28	31.968	96	35	4.311	B	32.37
318	3864AF2DE	20140728	10:01:04	114.279	31.9686	0	33	4.278	B	111.85
319	3864AF2DE	20140728	9:01:47	114.28	31.9678	123	32	4.279	C	33.39
320	3864AF2DE	20140728	8:01:17	114.28	31.9678	131	26	4.265	B	42.96
321	3864AF2DE	20140728	7:02:19	114.28	31.968	141	22.24	4.269	C	38.88
322	3864AF2DE	20140728	6:02:15	114.28	31.9679	118	25.24	4.279	C	19.83
323	3864AF2DE	20140728	5:01:08	114.279	31.968	119	25	4.285	B	10
324	3864AF2DE	20140728	4:01:01	114.279	31.9679	117	24	4.289	B	35.48
325	3864AF2DE	20140728	3:01:26	114.279	31.9678	140	25	4.297	B	39.01
326	3864AF2DE	20140728	2:01:16	114.279	31.9678	0	20	4.303	B	92.8
327	3864AF2DE	20140728	1:00:55	114.279	31.9681	124	25.24	4.308	B	14.89
328	3864AF2DE	20140728	0:00:56	114.279	31.9681	123	20.24	4.312	B	18.92
329	3864AF2DE	20140727	23:01:03	114.279	31.9681	147	20	4.317	B	22.52
330	3864AF2DE	20140727	22:00:59	114.279	31.968	138	20.24	4.322	B	19.93
331	3864AF2DE	20140727	21:01:03	114.279	31.968	141	21	4.326	B	25.45
332	3864AF2DE	20140727	20:00:54	114.279	31.9681	131	20.24	4.33	B	17.04
333	3864AF2DE	20140727	19:00:59	114.279	31.9678	97	22.24	4.334	B	26.9
334	3864AF2DE	20140727	18:00:59	114.28	31.9679	122	25.24	4.338	B	23.43
335	3864AF2DE	20140727	17:02:11	114.28	31.9679	121	28.24	4.343	C	25.88
336	3864AF2DE	20140727	16:01:36	114.279	31.9678	81	32	4.351	C	29.01
337	3864AF2DE	20140727	15:01:20	114.28	31.9679	155	29	4.345	B	16.34
338	3864AF2DE	20140727	14:00:58	114.279	31.9682	124	33	4.365	B	14.52
339	3864AF2DE	20140727	13:01:07	114.28	31.9678	194	33.24	4.301	B	41.93
340	3864AF2DE	20140727	12:00:56	114.28	31.968	184	36	4.338	B	18.29
341	3864AF2DE	20140727	11:00:56	114.28	31.9678	54	34.24	4.33	B	52.12
342	3864AF2DE	20140727	10:00:55	114.279	31.968	98	31.24	4.312	B	8.64
343	3864AF2DE	20140727	9:01:21	114.28	31.9678	158	27.24	4.31	B	35.56
344	3864AF2DE	20140727	8:01:03	114.28	31.9679	103	24.24	4.298	B	32.24
345	3864AF2DE	20140727	7:00:57	114.28	31.9679	139	20	4.296	B	14.28
346	3864AF2DE	20140727	6:00:54	114.28	31.9679	119	23.24	4.298	B	21.34
347	3864AF2DE	20140727	5:00:58	114.279	31.968	101	24	4.302	B	24.94
348	3864AF2DE	20140727	4:00:48	114.28	31.9679	162	24	4.305	B	30.62
349	3864AF2DE	20140727	3:00:49	114.279	31.9679	87	24.24	4.309	B	24.83
350	3864AF2DE	20140727	2:00:46	114.28	31.9679	97	24	4.312	B	16.87
351	3864AF2DE	20140727	1:00:55	114.279	31.9679	96	24.24	4.316	B	21.92
352	3864AF2DE	20140727	0:01:00	114.28	31.9679	120	24.24	4.32	B	22.33
353	3864AF2DE	20140726	23:00:57	114.28	31.9679	127	24.24	4.324	B	24.07
354	3864AF2DE	20140726	22:00:55	114.28	31.9678	136	23.24	4.328	B	26.74
355	3864AF2DE	20140726	21:01:15	114.28	31.9677	147	24.24	4.333	B	42.14
356	3864AF2DE	20140726	20:00:55	114.279	31.9679	100	24.24	4.337	B	21.09
357	3864AF2DE	20140726	19:00:51	114.28	31.968	100	25.24	4.34	B	21.83
358	3864AF2DE	20140726	18:01:04	114.28	31.9679	109	25	4.342	B	20.94
359	3864AF2DE	20140726	17:01:14	114.28	31.9679	51	23.24	4.342	B	27.8
360	3864AF2DE	20140726	16:01:23	114.28	31.9679	149	23.24	4.338	B	18.49
361	3864AF2DE	20140726	15:00:52	114.28	31.968	111	34	4.356	B	7.54
362	3864AF2DE	20140726	14:00:57	114.28	31.9679	120	30	4.332	B	24.92
363	3864AF2DE	20140726	13:01:20	114.28	31.9679	122	26.24	4.326	B	20.17
364	3864AF2DE	20140726	12:01:06	114.28	31.968	111	26	4.326	B	9.58
365	3864AF2DE	20140726	11:01:08	114.279	31.9681	145	27.24	4.326	B	8.93
366	3864AF2DE	20140726	10:01:49	114.28	31.9678	171	33.24	4.322	C	34.55
367	3864AF2DE	20140726	9:01:03	114.28	31.9683	176	31	4.316	B	48.82
368	3864AF2DE	20140726	8:01:05	114.28	31.9679	96	23	4.3	B	38.56
369	3864AF2DE	20140726	7:01:01	114.28	31.9679	157	20	4.302	B	42.83
370	3864AF2DE	20140726	6:00:52	114.28	31.9678	114	23	4.302	B	26.02
371	3864AF2DE	20140726	5:00:56	114.279	31.9679	110	23	4.306	B	21.62
372	3864AF2DE	20140726	4:00:53	114.28	31.9679	123	23.24	4.31	B	17.46
373	3864AF2DE	20140726	3:00:49	114.28	31.9679	122	23.24	4.314	B	16.5
374	3864AF2DE	20140726	2:00:48	114.279	31.968	133	23.24	4.317	B	6.45
375	3864AF2DE	20140726	1:00:55	114.28	31.9681	155	23.24	4.32	B	28.02
376	3864AF2DE	20140726	0:00:46	114.279	31.9679	105	24.24	4.323	B	17.19
377	3864AF2DE	20140725	23:00:49	114.28	31.9679	112	25	4.326	B	22.05
378	3864AF2DE	20140725	22:00:54	114.28	31.9678	131	25	4.33	B	27.92
379	3864AF2DE	20140725	21:00:57	114.28	31.9679	135	25.24	4.333	B	21.34
380	3864AF2DE	20140725	20:00:55	114.28	31.9679	128	20	4.336	B	22.05
381	3864AF2DE	20140725	19:00:58	114.279	31.9679	116	22.24	4.339	B	24.57
382	3864AF2DE	20140725	18:00:55	114.28	31.9678	148	25	4.342	B	32.78
383	3864AF2DE	20140725	17:01:09	114.279	31.9679	122	25.24	4.343	B	19.33
384	3864AF2DE	20140725	16:01:04	114.28	31.9684	120	35	4.357	B	35.39
385	3864AF2DE	20140725	15:00:56	114.28	31.9682	100	30	4.36	B	28.67
386	3864AF2DE	20140725	14:01:09	114.279	31.9679	145	29.24	4.348	B	20.5
387	3864AF2DE	20140725	13:01:11	114.279	31.9679	119	38	4.337	B	20.87
388	3864AF2DE	20140725	12:01:20	114.28	31.9679	120	32.24	4.32	B	23.16
389	3864AF2DE	20140725	11:01:16	114.28	31.9679	99	29.24	4.277	B	14.71
390	3864AF2DE	20140725	10:00:56	114.28	31.968	142	23	4.271	B	9.58
391	3864AF2DE	20140725	9:01:32	114.279	31.9676	66	26	4.287	C	59.06
392	3864AF2DE	20140725	8:00:53	114.28	31.9679	135	21.24	4.274	B	18.72
393	3864AF2DE	20140725	7:01:01	114.28	31.9679	130	20.24	4.261	B	22.77
394	3864AF2DE	20140725	6:01:01	114.279	31.9681	131	25.24	4.262	B	18.89
395	3864AF2DE	20140725	5:01:26	114.279	31.9682	146	20	4.268	B	27.05
396	3864AF2DE	20140725	4:00:55	114.279	31.9681	126	25.24	4.272	B	11.44
397	3864AF2DE	20140725	3:01:05	114.279	31.968	130	25.24	4.276	B	11.01
398	3864AF2DE	20140725	2:02:16	114.28	31.968	167	21	4.286	C	31.17
399	3864AF2DE	20140725	1:02:20	114.278	31.9678	6	20.24	4.296	C	132.98
400	3864AF2DE	20140725	0:01:04	114.279	31.9679	139	20.24	4.302	B	18.9
401	3864AF2DE	20140724	23:00:57	114.279	31.9679	112	20.24	4.306	B	28.2
402	3864AF2DE	20140724	22:01:05	114.279	31.9681	113	21	4.311	B	22.67
403	3864AF2DE	20140724	21:01:03	114.279	31.968	132	21.24	4.316	B	10.35
404	3864AF2DE	20140724	20:01:00	114.28	31.968	147	22.24	4.32	B	11.53
405	3864AF2DE	20140724	19:01:04	114.279	31.9681	114	23.24	4.325	B	11.09
406	3864AF2DE	20140724	18:01:07	114.28	31.9681	115	25.24	4.329	B	30.95
407	3864AF2DE	20140724	17:01:02	114.28	31.968	125	30.24	4.332	B	12.36
408	3864AF2DE	20140724	16:01:11	114.279	31.9679	112	26.24	4.328	B	19.33
409	3864AF2DE	20140724	15:00:54	114.279	31.968	111	30.24	4.324	B	8.23
410	3864AF2DE	20140724	14:01:00	114.279	31.9679	104	28.24	4.314	B	24.75
411	3864AF2DE	20140724	13:00:56	114.28	31.9682	128	32.24	4.277	B	43.92
412	3864AF2DE	20140724	12:00:54	114.28	31.9677	230	28	4.242	B	93.05
413	3864AF2DE	20140724	11:00:52	114.28	31.9679	106	25	4.235	B	19.04
414	3864AF2DE	20140724	9:01:14	114.28	31.9683	152	26.24	4.24	B	37.68
415	3864AF2DE	20140724	8:01:31	114.28	31.9679	164	22.24	4.237	C	32.67
416	3864AF2DE	20140724	7:01:03	114.28	31.9679	155	21.24	4.238	B	23.05
417	3864AF2DE	20140724	6:00:53	114.279	31.9679	123	21	4.241	B	18.64
418	3864AF2DE	20140724	5:00:54	114.279	31.9679	127	21	4.244	B	24.41
419	3864AF2DE	20140724	4:00:55	114.279	31.9679	137	21.24	4.247	B	23.1
420	3864AF2DE	20140724	3:00:46	114.28	31.9679	131	21	4.25	B	19.55
421	3864AF2DE	20140724	2:00:55	114.28	31.968	125	21.24	4.254	B	13.18
422	3864AF2DE	20140724	1:01:04	114.28	31.968	118	22	4.258	B	12.99
423	3864AF2DE	20140724	0:01:01	114.28	31.9679	113	22	4.262	B	24.93
424	3864AF2DE	20140723	23:00:59	114.279	31.9679	119	21.24	4.267	B	18.9
425	3864AF2DE	20140723	22:01:04	114.28	31.968	132	22	4.272	B	13.18
426	3864AF2DE	20140723	21:00:55	114.279	31.968	151	22	4.277	B	13.58
427	3864AF2DE	20140723	20:00:53	114.279	31.968	114	22	4.282	B	5.29
428	3864AF2DE	20140723	19:00:49	114.28	31.9679	109	23	4.285	B	14.28
429	3864AF2DE	20140723	18:00:55	114.28	31.9679	121	24	4.289	B	15.22
430	3864AF2DE	20140723	17:00:54	114.28	31.968	137	25	4.292	B	20.02
431	3864AF2DE	20140723	16:00:51	114.28	31.968	92	29	4.283	B	14.31
432	3864AF2DE	20140723	15:00:58	114.279	31.9683	95	25	4.266	B	46.91
433	3864AF2DE	20140723	14:01:03	114.28	31.9679	115	29	4.27	B	23.43
434	3864AF2DE	20140723	13:00:56	114.28	31.9679	129	27	4.249	B	16.22
435	3864AF2DE	20140723	12:01:03	114.28	31.9678	118	27.24	4.238	B	33.8
436	3864AF2DE	20140723	11:00:52	114.28	31.9678	94	31.24	4.224	B	54.93
437	3864AF2DE	20140723	10:02:39	114.28	31.968	166	26.24	4.21	C	40.65
439	3864AF2DE	20140723	8:01:00	114.28	31.9679	149	23.24	4.223	B	33.97
440	3864AF2DE	20140723	7:00:59	114.28	31.9679	132	21	4.22	B	19.83
441	3864AF2DE	20140723	6:01:18	114.279	31.968	141	22.24	4.224	B	11.28
442	3864AF2DE	20140723	5:00:58	114.279	31.968	126	22.24	4.227	B	11.28
443	3864AF2DE	20140723	4:00:59	114.279	31.968	129	23	4.23	B	11.17
444	3864AF2DE	20140723	3:01:12	114.279	31.968	121	23	4.234	B	12.96
445	3864AF2DE	20140723	2:01:47	114.28	31.9679	118	23.24	4.24	C	14.1
446	3864AF2DE	20140723	1:01:11	114.279	31.9679	151	23	4.244	B	23.31
447	3864AF2DE	20140723	0:00:56	114.279	31.968	129	22.24	4.248	B	9.74
448	3864AF2DE	20140722	23:00:55	114.279	31.9679	92	22.24	4.252	B	42.91
449	3864AF2DE	20140722	22:00:55	114.28	31.968	130	23	4.257	B	6.28
450	3864AF2DE	20140722	21:01:12	114.279	31.9681	108	23	4.262	B	13.25
451	3864AF2DE	20140722	20:00:54	114.279	31.9679	93	23.24	4.267	B	27.98
452	3864AF2DE	20140722	19:00:55	114.279	31.9679	115	25	4.272	B	19.75
453	3864AF2DE	20140722	18:00:58	114.279	31.968	67	28	4.276	B	8.64
454	3864AF2DE	20140722	17:00:59	114.279	31.9683	135	32	4.278	B	31.1
455	3864AF2DE	20140722	16:01:14	114.279	31.9681	114	29.24	4.275	B	11.21
456	3864AF2DE	20140722	15:01:00	114.279	31.9679	116	32	4.269	B	17.87
457	3864AF2DE	20140722	14:00:55	114.28	31.9679	128	36	4.257	B	16.34
458	3864AF2DE	20140722	13:00:55	114.279	31.9684	126	37.24	4.204	B	35.91
459	3864AF2DE	20140722	12:00:52	114.28	31.9678	130	32.24	4.189	B	34.78
460	3864AF2DE	20140722	11:00:57	114.28	31.968	118	39	4.166	B	24.42
461	3864AF2DE	20140722	10:01:05	114.28	31.9679	114	33.24	4.139	B	16.34
462	3864AF2DE	20140722	9:02:27	114.28	31.9683	174	34.24	4.141	C	26.89
463	3864AF2DE	20140722	3:11:53	114.279	31.968	117	22	4.142	D	12.96
464	3864AF2DE	20140722	2:00:54	114.279	31.968	134	20.24	4.146	B	13.58
465	3864AF2DE	20140722	1:01:16	114.28	31.9682	155	21.24	4.149	B	15.11
466	3864AF2DE	20140722	0:00:56	114.279	31.968	124	22	4.15	B	16.15
467	3864AF2DE	20140721	23:00:59	114.279	31.968	107	22.24	4.152	B	20.99
468	3864AF2DE	20140721	22:00:55	114.279	31.9679	114	21.24	4.154	B	27.82
469	3864AF2DE	20140721	21:00:57	114.279	31.9681	113	22	4.157	B	27.01
470	3864AF2DE	20140721	20:00:55	114.279	31.968	94	22.24	4.158	B	21.54
471	3864AF2DE	20140721	19:00:55	114.279	31.9681	125	24	4.161	B	13.25
472	3864AF2DE	20140721	18:00:51	114.28	31.9679	133	30	4.161	B	22.97
473	3864AF2DE	20140721	17:00:56	114.28	31.9678	113	28	4.157	B	25.39
474	3864AF2DE	20140721	16:01:26	114.28	31.968	132	35.24	4.158	B	18.9
475	3864AF2DE	20140721	15:00:53	114.28	31.968	94	38.24	4.135	B	28.39
476	3864AF2DE	20140721	14:00:58	114.28	31.9681	156	40	4.108	B	38.63
477	3864AF2DE	20140721	13:00:56	114.28	31.9679	116	35.24	4.083	B	20.14
478	3864AF2DE	20140721	12:01:11	114.279	31.968	123	36	4.067	B	14.87
479	3864AF2DE	20140721	11:00:50	114.279	31.9682	107	30	4.046	B	23.97
480	3864AF2DE	20140721	10:00:57	114.28	31.9681	131	30	4.029	B	27.14
481	3864AF2DE	20140721	9:01:43	114.28	31.9684	173	27.24	4.024	C	39.32
482	3864AF2DE	20140721	8:01:08	114.28	31.968	150	26.24	4.02	B	44.56
483	3864AF2DE	20140721	7:01:22	114.279	31.9679	129	24	4.019	B	19.75
484	3864AF2DE	20140721	6:00:58	114.28	31.9679	112	20.24	4.019	B	21.34
485	3864AF2DE	20140721	5:01:13	114.28	31.9679	121	21.24	4.02	B	21.06
486	3864AF2DE	20140721	4:01:14	114.28	31.9678	126	22	4.022	B	32.08
487	3864AF2DE	20140721	3:01:10	114.28	31.9679	104	22.24	4.024	B	14.28
488	3864AF2DE	20140721	2:01:03	114.28	31.968	141	22.24	4.025	B	13.18
489	3864AF2DE	20140721	1:01:00	114.28	31.9678	98	22	4.027	B	34.62
490	3864AF2DE	20140721	0:01:22	114.28	31.9678	120	22	4.029	B	34.12
491	3864AF2DE	20140720	23:01:00	114.279	31.9678	94	22	4.031	B	40.93
492	3864AF2DE	20140720	22:01:49	114.276	31.9672	0	23	4.034	C	363.18
493	3864AF2DE	20140720	21:01:07	114.28	31.9681	106	22	4.036	B	15.91
494	3864AF2DE	20140720	20:00:55	114.28	31.9678	149	22	4.038	B	35.56
495	3864AF2DE	20140720	19:00:55	114.28	31.9679	123	23.24	4.04	B	21.23
496	3864AF2DE	20140720	18:00:57	114.28	31.9678	115	26.24	4.041	B	34.08
497	3864AF2DE	20140720	17:01:08	114.279	31.968	123	27.24	4.039	B	5.37
498	3864AF2DE	20140720	16:01:29	114.279	31.9679	93	25	4.04	B	19.33
499	3864AF2DE	20140720	15:00:53	114.28	31.9681	101	39.24	4.02	B	28.02
500	3864AF2DE	20140720	14:00:55	114.28	31.968	107	34	4.003	B	15.1
501	3864AF2DE	20140720	13:01:03	114.28	31.9678	120	31.24	3.985	B	27.85
502	3864AF2DE	20140720	12:01:06	114.28	31.968	125	34	3.979	B	11.53
503	3864AF2DE	20140720	11:01:13	114.28	31.9679	114	34.24	3.974	B	17.61
504	3864AF2DE	20140720	10:00:58	114.28	31.9685	59	33.24	3.967	B	55.61
505	3864AF2DE	20140720	9:01:46	114.28	31.9681	145	28	3.959	C	19.46
506	3864AF2DE	20140720	8:01:11	114.28	31.968	484	27	3.956	B	86.77
507	3864AF2DE	20140720	7:01:43	114.279	31.9678	111	22.24	3.955	C	27.57
508	3864AF2DE	20140720	6:00:55	114.28	31.968	108	21	3.955	B	18.01
509	3864AF2DE	20140720	5:00:53	114.279	31.9679	128	20.24	3.956	B	16.41
510	3864AF2DE	20140720	4:00:55	114.279	31.968	113	21	3.957	B	11.28
511	3864AF2DE	20140720	3:01:14	114.279	31.968	137	21	3.958	B	15.42
512	3864AF2DE	20140720	2:01:16	114.279	31.968	144	21	3.96	B	13.96
513	3864AF2DE	20140720	1:01:11	114.279	31.9679	131	21.24	3.961	B	23.57
514	3864AF2DE	20140720	0:01:21	114.28	31.9679	117	21.25	3.966	B	23.05
515	3864AF2DE	20140719	23:01:02	114.279	31.9679	114	22	3.969	B	16.13
516	3864AF2DE	20140719	22:01:00	114.279	31.9679	112	21.25	3.973	B	19.39
517	3864AF2DE	20140719	21:00:55	114.28	31.9678	155	22	3.977	B	29.29
518	3864AF2DE	20140719	20:01:06	114.279	31.968	143	22	3.98	B	10.22
519	3864AF2DE	20140719	19:00:49	114.279	31.9679	121	22.25	3.984	B	17.29
520	3864AF2DE	20140719	18:00:58	114.28	31.968	110	29	3.988	B	32.11
521	3864AF2DE	20140719	17:01:39	114.279	31.9678	102	28	3.989	C	31.76
522	3864AF2DE	20140719	16:01:20	114.279	31.9681	84	32	3.991	B	19.65
523	3864AF2DE	20140719	15:00:52	114.28	31.9681	112	32	3.985	B	20.42
524	3864AF2DE	20140719	14:00:56	114.28	31.9681	133	33	3.978	B	33.98
525	3864AF2DE	20140719	13:01:02	114.279	31.9679	127	29	3.967	B	21.96
526	3864AF2DE	20140719	12:01:05	114.28	31.9679	118	32.25	3.963	B	22.05
527	3864AF2DE	20140719	11:01:20	114.279	31.9679	112	32.25	3.958	B	21.27
528	3864AF2DE	20140719	10:01:01	114.28	31.9679	120	26.25	3.957	B	19.7
529	3864AF2DE	20140719	9:01:11	114.28	31.968	139	28.25	3.959	B	27.39
530	3864AF2DE	20140719	8:00:54	114.28	31.9681	135	26	3.957	B	36.39
531	3864AF2DE	20140719	7:01:22	114.279	31.9679	126	22	3.955	B	19.09
532	3864AF2DE	20140719	6:01:11	114.279	31.9681	110	20	3.96	B	17.84
533	3864AF2DE	20140719	5:01:08	114.279	31.9678	94	25.25	3.964	B	28.04
534	3864AF2DE	20140719	4:01:14	114.28	31.9679	132	20.25	3.967	B	16.71
535	3864AF2DE	20140719	3:00:55	114.28	31.9679	119	20	3.97	B	23.85
536	3864AF2DE	20140719	2:01:13	114.28	31.9679	142	21	3.973	B	14.28
537	3864AF2DE	20140719	1:01:34	114.28	31.968	104	21.25	3.978	C	6.54
538	3864AF2DE	20140719	0:00:58	114.279	31.968	125	22	3.981	B	9.74
539	3864AF2DE	20140718	23:01:10	114.279	31.9678	108	21.25	3.985	B	28.72
540	3864AF2DE	20140718	22:01:15	114.28	31.9681	161	22	3.99	B	11.85
541	3864AF2DE	20140718	21:00:39	114.279	31.968	86	21.25	3.993	A	10.04
542	3864AF2DE	20140718	20:00:33	114.28	31.968	107	20.25	3.997	A	12.99
543	3864AF2DE	20140718	19:00:41	114.279	31.9677	104	22.25	4	A	43.26
544	3864AF2DE	20140718	18:01:02	114.28	31.9679	147	28	4.004	B	28.44
545	3864AF2DE	20140718	17:00:45	114.28	31.9681	157	32	4.002	A	21.37
546	3864AF2DE	20140718	16:00:36	114.28	31.968	135	28	3.998	A	7.99
547	3864AF2DE	20140718	15:00:49	114.28	31.9679	122	29	3.995	B	14.11
548	3864AF2DE	20140718	14:00:36	114.28	31.9681	144	27.25	3.992	A	30.19
549	3864AF2DE	20140718	13:00:36	114.279	31.9679	119	30.25	3.989	A	19.85
550	3864AF2DE	20140718	12:00:35	114.28	31.9681	114	34.25	3.983	A	25.33
551	3864AF2DE	20140718	11:00:33	114.28	31.9679	112	35	3.971	A	23.06
552	3864AF2DE	20140718	10:00:35	114.28	31.9682	145	30.25	3.958	A	22.03
553	3864AF2DE	20140718	9:00:27	114.28	31.9679	137	26.24	3.958	A	26.38
554	3864AF2DE	20140718	8:00:37	114.28	31.9679	127	21.24	3.952	A	20.82
555	3864AF2DE	20140718	7:00:25	114.28	31.9682	132	23.24	3.95	A	16.12
556	3864AF2DE	20140718	6:00:26	114.28	31.9681	107	24.24	3.95	A	30.96
557	3864AF2DE	20140718	5:00:35	114.28	31.968	183	25	3.951	A	37.37
558	3864AF2DE	20140718	4:00:20	114.28	31.968	157	25.24	3.951	A	13.07
559	3864AF2DE	20140718	3:00:34	114.28	31.968	105	25.24	3.952	A	13.64
560	3864AF2DE	20140718	2:00:43	114.28	31.968	121	25	3.952	A	17.3
561	3864AF2DE	20140718	1:02:08	114.28	31.968	116	25.24	3.955	C	8.75
562	3864AF2DE	20140718	0:00:45	114.279	31.9679	81	20	3.955	A	17.52
563	3864A7E1C	20140811	23:01:12	114.28	31.9678	115	25.24	3.799	B	35.43
564	3864A7E1C	20140811	22:00:51	114.28	31.9678	120	20	3.8	B	29.96
565	3864A7E1C	20140811	21:01:12	114.28	31.9678	115	21	3.8	B	27.85
566	3864A7E1C	20140811	20:01:06	114.279	31.9681	133	25	3.801	B	12.98
567	3864A7E1C	20140811	19:00:51	114.28	31.9679	128	25	3.802	B	18.72
568	3864A7E1C	20140811	18:00:55	114.28	31.9678	111	24.24	3.804	B	25.39
569	3864A7E1C	20140811	17:00:49	114.28	31.9679	118	20	3.804	B	15.39
570	3864A7E1C	20140811	16:00:51	114.28	31.9679	131	20.24	3.805	B	16.4
571	3864A7E1C	20140811	15:00:53	114.279	31.9676	74	20	3.806	B	54.82
572	3864A7E1C	20140811	14:00:50	114.28	31.9679	121	20	3.806	B	16.34
573	3864A7E1C	20140811	13:00:55	114.28	31.9679	131	23.24	3.805	B	14.71
574	3864A7E1C	20140811	12:00:59	114.28	31.968	185	23	3.805	B	25.63
575	3864A7E1C	20140811	11:01:21	114.28	31.968	91	24.24	3.804	B	17.44
576	3864A7E1C	20140811	10:00:56	114.28	31.9678	99	24	3.804	B	26.74
577	3864A7E1C	20140811	9:01:11	114.28	31.9678	105	25	3.802	B	27.53
578	3864A7E1C	20140811	8:00:56	114.28	31.968	138	24	3.805	B	10.17
579	3864A7E1C	20140811	7:00:54	114.28	31.968	127	22	3.805	B	10.75
580	3864A7E1C	20140811	6:01:02	114.28	31.9679	135	25.24	3.806	B	20.08
581	3864A7E1C	20140811	5:00:54	114.28	31.9679	115	20.24	3.806	B	20.94
582	3864A7E1C	20140811	4:00:50	114.28	31.9679	114	22	3.807	B	22.05
583	3864A7E1C	20140811	3:00:49	114.28	31.9679	135	22	3.807	B	19.68
584	3864A7E1C	20140811	2:01:12	114.28	31.9679	138	22.24	3.808	B	21.09
585	3864A7E1C	20140811	1:00:53	114.28	31.9679	139	22.24	3.808	B	19.68
586	3864A7E1C	20140811	0:01:12	114.28	31.9678	106	22	3.809	B	27.1
587	3864A7E1C	20140810	23:00:53	114.279	31.9679	104	21.24	3.81	B	19.99
588	3864A7E1C	20140810	22:00:52	114.28	31.9679	92	21	3.811	B	15.22
589	3864A7E1C	20140810	21:00:46	114.28	31.9678	120	21.24	3.812	B	28.95
590	3864A7E1C	20140810	20:00:58	114.28	31.9678	132	20.24	3.813	B	27.53
591	3864A7E1C	20140810	19:00:48	114.28	31.9679	115	22	3.815	B	20.14
592	3864A7E1C	20140810	18:11:47	114.279	31.9679	111	23.24	3.815	D	18.9
593	3864A7E1C	20140810	17:01:11	114.28	31.9679	115	25	3.815	B	14.71
594	3864A7E1C	20140810	16:01:03	114.28	31.968	120	25.24	3.816	B	12.08
595	3864A7E1C	20140810	15:01:01	114.28	31.9679	117	27	3.816	B	15.22
596	3864A7E1C	20140810	14:01:02	114.28	31.968	124	26	3.816	B	21.74
597	3864A7E1C	20140810	13:00:58	114.279	31.9678	93	24.24	3.815	B	30.24
598	3864A7E1C	20140810	12:00:56	114.28	31.968	124	24.24	3.815	B	21.24
599	3864A7E1C	20140810	11:01:11	114.28	31.9679	123	26	3.814	B	24.93
600	3864A7E1C	20140810	10:01:42	114.28	31.9679	114	26	3.812	C	19.83
601	3864A7E1C	20140810	9:01:15	114.279	31.9678	121	24	3.811	B	25.34
602	3864A7E1C	20140810	8:02:02	114.279	31.9681	139	25.24	3.812	C	7.28
603	3864A7E1C	20140810	7:00:59	114.279	31.968	108	23	3.812	B	14.04
604	3864A7E1C	20140810	6:00:54	114.279	31.968	143	24	3.813	B	16.61
605	3864A7E1C	20140810	5:00:54	114.279	31.968	116	20.24	3.813	B	21.89
606	3864A7E1C	20140810	4:00:47	114.279	31.9681	130	21.24	3.813	B	16.8
607	3864A7E1C	20140810	3:00:49	114.279	31.9681	126	21	3.814	B	6.95
608	3864A7E1C	20140810	2:00:51	114.279	31.968	155	21	3.815	B	11.1
609	3864A7E1C	20140810	1:00:49	114.279	31.9681	122	21	3.815	B	14.89
610	3864A7E1C	20140810	0:00:54	114.279	31.9681	116	22.24	3.815	B	15.16
611	3864A7E1C	20140809	23:01:12	114.279	31.9681	126	21.24	3.817	B	20.78
612	3864A7E1C	20140809	22:00:55	114.28	31.9679	88	22	3.817	B	21.34
613	3864A7E1C	20140809	21:00:57	114.28	31.968	113	21.24	3.818	B	10.71
614	3864A7E1C	20140809	20:00:55	114.28	31.9679	178	25.24	3.819	B	33.28
615	3864A7E1C	20140809	19:00:50	114.28	31.9679	115	20	3.82	B	21.94
616	3864A7E1C	20140809	18:01:00	114.279	31.9675	55	25.24	3.821	B	63.35
617	3864A7E1C	20140809	17:00:55	114.279	31.968	128	20.24	3.821	B	7.54
618	3864A7E1C	20140809	16:00:48	114.279	31.9679	122	25	3.822	B	16.41
619	3864A7E1C	20140809	15:01:11	114.28	31.9679	120	21	3.823	B	17.95
620	3864A7E1C	20140809	14:00:48	114.279	31.968	103	20.24	3.825	B	12.2
621	3864A7E1C	20140809	13:00:57	114.28	31.968	145	25.24	3.825	B	19.5
622	3864A7E1C	20140809	12:00:56	114.28	31.9679	117	20.24	3.826	B	20.62
623	3864A7E1C	20140809	11:00:55	114.279	31.9679	139	21	3.824	B	18.64
624	3864A7E1C	20140809	10:00:46	114.279	31.9682	108	25.24	3.822	B	20.48
625	3864A7E1C	20140809	8:01:12	114.279	31.968	115	22	3.826	B	9.17
626	3864A7E1C	20140809	7:00:57	114.279	31.9679	145	21.24	3.827	B	15.08
627	3864A7E1C	20140809	6:00:48	114.28	31.9679	131	25.24	3.828	B	18.58
628	3864A7E1C	20140809	5:00:53	114.28	31.9679	129	21	3.828	B	17.95
629	3864A7E1C	20140809	4:00:55	114.28	31.9679	121	21.24	3.829	B	18.49
630	3864A7E1C	20140809	3:00:48	114.28	31.9679	131	22	3.83	B	23.94
631	3864A7E1C	20140809	2:01:12	114.279	31.968	113	22	3.831	B	11.28
632	3864A7E1C	20140809	1:00:56	114.279	31.9679	111	22	3.832	B	17.52
633	3864A7E1C	20140809	0:00:54	114.279	31.968	113	22	3.833	B	9.11
634	3864A7E1C	20140808	23:00:48	114.28	31.9679	132	22.24	3.833	B	16.5
635	3864A7E1C	20140808	22:00:55	114.28	31.9679	121	22	3.834	B	21.26
636	3864A7E1C	20140808	21:00:55	114.28	31.968	141	22.24	3.835	B	15.98
637	3864A7E1C	20140808	20:00:52	114.28	31.9681	125	22	3.836	B	0.59
638	3864A7E1C	20140808	19:00:48	114.279	31.9679	136	23	3.837	B	19.75
639	3864A7E1C	20140808	18:00:58	114.28	31.9678	109	22.24	3.838	B	27.62
640	3864A7E1C	20140808	17:01:11	114.28	31.9679	119	23.24	3.84	B	15.79
641	3864A7E1C	20140808	16:01:14	114.28	31.9678	119	23.24	3.842	B	31.37
642	3864A7E1C	20140808	15:00:54	114.28	31.968	128	24.24	3.844	B	14.57
643	3864A7E1C	20140808	14:00:46	114.279	31.968	111	24	3.845	B	13.07
644	3864A7E1C	20140808	13:00:50	114.28	31.9679	129	24.24	3.846	B	16.87
645	3864A7E1C	20140808	12:00:56	114.279	31.9679	136	24.24	3.843	B	15.85
646	3864A7E1C	20140808	11:00:59	114.279	31.9679	124	23	3.842	B	17.52
647	3864A7E1C	20140808	10:04:36	114.28	31.9679	115	23.24	3.846	D	24.28
648	3864A7E1C	20140808	9:02:12	114.279	31.9676	25	23.24	3.849	C	59.3
649	3864A7E1C	20140808	8:03:54	114.28	31.9683	165	23	3.866	D	29.05
650	3864A7E1C	20140808	7:02:08	114.28	31.9679	159	21	3.872	C	25.91
651	3864A7E1C	20140808	6:00:53	114.28	31.9679	152	20	3.873	B	18.58
652	3864A7E1C	20140808	5:01:12	114.279	31.9679	140	21.24	3.876	B	24.53
653	3864A7E1C	20140808	4:00:45	114.279	31.9679	121	22	3.877	A	19.33
654	3864A7E1C	20140808	3:00:51	114.279	31.9678	120	20.24	3.878	B	26.94
655	3864A7E1C	20140808	2:00:56	114.279	31.9679	130	20.24	3.88	B	19.99
656	3864A7E1C	20140808	1:00:45	114.279	31.968	122	21	3.88	A	16.61
657	3864A7E1C	20140808	0:00:53	114.279	31.968	119	22	3.882	B	14.04
658	3864A7E1C	20140807	23:00:55	114.279	31.968	109	21.24	3.883	B	8.14
659	3864A7E1C	20140807	22:00:50	114.28	31.968	142	20	3.884	B	14.62
660	3864A7E1C	20140807	21:00:48	114.279	31.968	144	21	3.885	B	10.85
661	3864A7E1C	20140807	20:00:45	114.279	31.9677	79	20.24	3.886	A	64.03
662	3864A7E1C	20140807	19:00:51	114.279	31.968	119	23.24	3.887	B	11.17
663	3864A7E1C	20140807	18:01:00	114.28	31.968	133	24.24	3.888	B	10.17
664	3864A7E1C	20140807	17:00:51	114.28	31.9679	140	20.24	3.889	B	24.92
665	3864A7E1C	20140807	16:00:48	114.28	31.9679	117	25.24	3.89	B	22.05
666	3864A7E1C	20140807	15:00:53	114.279	31.9679	90	22	3.89	B	23.42
667	3864A7E1C	20140807	14:00:55	114.279	31.968	110	20	3.892	B	7.54
668	3864A7E1C	20140807	13:00:55	114.28	31.968	116	21.24	3.891	B	18.98
669	3864A7E1C	20140807	12:01:04	114.28	31.9679	118	25.24	3.893	B	20.62
670	3864A7E1C	20140807	11:01:14	114.279	31.968	113	25	3.894	B	14.87
671	3864A7E1C	20140807	10:00:57	114.28	31.968	86	25.24	3.895	B	20.02
672	3864A7E1C	20140807	9:02:00	114.28	31.9681	116	25.24	3.895	C	10.04
673	3864A7E1C	20140807	8:01:28	114.28	31.9682	130	25	3.902	B	19.91
674	3864A7E1C	20140807	7:01:03	114.28	31.9679	116	23.24	3.903	B	22.77
675	3864A7E1C	20140807	6:01:03	114.279	31.9679	98	23.24	3.904	B	24.68
676	3864A7E1C	20140807	5:00:54	114.279	31.968	104	25	3.905	B	15.42
677	3864A7E1C	20140807	4:00:58	114.279	31.968	113	25	3.906	B	32.3
678	3864A7E1C	20140807	3:00:52	114.279	31.9681	126	24.24	3.907	B	17.04
679	3864A7E1C	20140807	2:00:56	114.279	31.9681	73	25	3.908	B	55.01
680	3864A7E1C	20140807	1:00:55	114.279	31.9681	121	24.24	3.909	B	15.16
681	3864A7E1C	20140807	0:01:12	114.279	31.9681	127	25.24	3.91	B	17
682	3864A7E1C	20140806	23:00:49	114.279	31.968	141	22	3.91	B	17.58
683	3864A7E1C	20140806	22:00:53	114.279	31.9683	141	22	3.911	B	32.08
684	3864A7E1C	20140806	21:01:12	114.279	31.9681	131	23.24	3.912	B	14.9
685	3864A7E1C	20140806	20:00:52	114.279	31.9682	139	22.24	3.913	B	14.29
686	3864A7E1C	20140806	19:00:52	114.279	31.968	105	21.24	3.914	B	24.96
687	3864A7E1C	20140806	18:01:12	114.28	31.9679	114	22.24	3.915	B	19.04
688	3864A7E1C	20140806	17:01:41	114.28	31.968	119	24	3.917	C	21.71
689	3864A7E1C	20140806	16:00:56	114.279	31.9678	104	23.24	3.918	B	32.47
690	3864A7E1C	20140806	15:00:49	114.28	31.968	128	24.24	3.919	B	12.99
691	3864A7E1C	20140806	14:00:55	114.28	31.9679	111	27	3.92	B	16.34
692	3864A7E1C	20140806	13:00:55	114.28	31.968	134	25	3.919	B	12.36
693	3864A7E1C	20140806	12:00:56	114.28	31.9679	125	25	3.92	B	16.5
694	3864A7E1C	20140806	11:01:11	114.279	31.9676	95	26	3.92	B	48.22
695	3864A7E1C	20140806	10:01:05	114.28	31.968	108	25.24	3.921	B	16.16
696	3864A7E1C	20140806	9:02:12	114.279	31.9679	122	24	3.923	C	19.73
697	3864A7E1C	20140806	8:01:26	114.28	31.9683	141	24	3.928	B	33.4
698	3864A7E1C	20140806	7:01:09	114.28	31.9677	136	23	3.93	B	48.53
699	3864A7E1C	20140806	6:01:20	114.279	31.968	181	23.24	3.931	B	14.93
700	3864A7E1C	20140806	5:01:42	114.279	31.9681	125	24	3.933	C	38.09
701	3864A7E1C	20140806	4:01:01	114.279	31.968	96	24	3.934	B	12
702	3864A7E1C	20140806	3:00:55	114.279	31.968	133	23	3.935	B	16.15
703	3864A7E1C	20140806	2:00:54	114.279	31.968	120	23	3.936	B	26.25
704	3864A7E1C	20140806	1:00:55	114.279	31.9681	137	24	3.937	B	12.61
705	3864A7E1C	20140806	0:01:11	114.279	31.9681	102	24.24	3.938	B	14.9
706	3864A7E1C	20140805	23:00:58	114.279	31.9681	122	23	3.94	B	13.3
707	3864A7E1C	20140805	22:01:12	114.279	31.968	146	24	3.941	B	14.93
708	3864A7E1C	20140805	21:00:54	114.279	31.968	131	23.24	3.942	B	18.82
709	3864A7E1C	20140805	20:01:25	114.279	31.9679	221	24	3.944	B	18.89
710	3864A7E1C	20140805	19:00:55	114.279	31.9681	120	24	3.945	B	15.16
711	3864A7E1C	20140805	18:01:12	114.279	31.9679	94	25.24	3.947	B	22.1
712	3864A7E1C	20140805	17:00:58	114.28	31.968	140	26.24	3.948	B	42.48
713	3864A7E1C	20140805	16:00:54	114.279	31.9679	106	25.24	3.949	B	22.57
714	3864A7E1C	20140805	15:00:54	114.28	31.9681	102	29	3.949	B	21.7
715	3864A7E1C	20140805	14:00:55	114.28	31.968	123	25.24	3.945	B	10.75
716	3864A7E1C	20140805	13:00:55	114.279	31.9679	106	22.24	3.943	B	22.04
717	3864A7E1C	20140805	12:01:13	114.279	31.9678	149	20.24	3.943	B	26.94
718	3864A7E1C	20140805	11:01:02	114.28	31.9674	91	28.24	3.942	B	82.75
719	3864A7E1C	20140805	10:00:53	114.28	31.9678	76	30	3.941	B	25.64
720	3864A7E1C	20140805	9:01:11	114.28	31.9681	95	33	3.937	B	8.03
721	3864A7E1C	20140805	8:01:20	114.28	31.9681	135	27.24	3.943	B	6.36
722	3864A7E1C	20140805	7:01:19	114.28	31.9679	119	25.24	3.944	B	24.29
723	3864A7E1C	20140805	6:01:12	114.28	31.968	119	23	3.946	B	21.71
724	3864A7E1C	20140805	0:00:54	114.279	31.9681	135	24	3.953	B	5.63
725	3864A7E1C	20140804	23:01:05	114.279	31.9678	126	25	3.954	B	32.28
726	3864A7E1C	20140804	22:00:55	114.279	31.968	137	24.24	3.956	B	17.14
727	3864A7E1C	20140804	21:01:09	114.279	31.968	130	24.24	3.957	B	18.35
728	3864A7E1C	20140804	20:00:54	114.279	31.9681	129	24	3.958	B	16.88
729	3864A7E1C	20140804	9:01:37	114.28	31.9679	112	32.24	3.94	C	20.82
730	3864A7E1C	20140804	8:01:12	114.28	31.9678	97	32.24	3.942	B	27.53
731	3864A7E1C	20140804	7:01:12	114.28	31.968	128	26	3.94	B	10.71
732	3864A7E1C	20140804	6:00:51	114.28	31.9679	114	22.24	3.941	B	22.62
733	3864A7E1C	20140804	5:00:54	114.279	31.9681	101	22.24	3.942	B	22.52
734	3864A7E1C	20140804	4:00:53	114.279	31.968	121	22.24	3.942	B	19.39
735	3864A7E1C	20140804	3:00:49	114.279	31.968	145	23	3.943	B	11.78
736	3864A7E1C	20140804	2:00:55	114.279	31.968	111	23.24	3.944	B	21.03
737	3864A7E1C	20140804	1:01:13	114.279	31.968	100	23.24	3.946	B	26.68
738	3864A7E1C	20140804	0:01:02	114.279	31.9681	124	24	3.947	B	16.88
739	3864A7E1C	20140803	23:00:53	114.279	31.968	108	23.24	3.948	B	21.56
740	3864A7E1C	20140803	22:00:52	114.279	31.9681	120	23	3.949	B	18.89
741	3864A7E1C	20140803	21:01:20	114.279	31.968	101	24.24	3.951	B	28.7
742	3864A7E1C	20140803	20:00:54	114.279	31.9681	115	24.24	3.952	B	22.52
743	3864A7E1C	20140803	19:01:03	114.279	31.968	81	26	3.953	B	35.3
744	3864A7E1C	20140803	18:00:55	114.28	31.9679	128	31	3.954	B	15.36
745	3864A7E1C	20140803	17:00:46	114.28	31.9679	132	34	3.951	B	27.59
746	3864A7E1C	20140803	16:00:45	114.28	31.9681	99	33	3.945	A	15.66
747	3864A7E1C	20140803	15:01:06	114.28	31.968	120	35.24	3.943	B	24.78
748	3864A7E1C	20140803	14:01:03	114.28	31.968	58	30	3.94	B	18.64
749	3864A7E1C	20140803	13:01:11	114.28	31.9681	119	34.24	3.937	B	14
750	3864A7E1C	20140803	12:01:43	114.28	31.9679	125	29	3.934	C	14.1
751	3864A7E1C	20140803	11:01:10	114.28	31.9681	117	35	3.931	B	21.38
752	3864A7E1C	20140803	10:00:55	114.28	31.968	109	30	3.923	B	15.46
753	3864A7E1C	20140803	9:01:36	114.28	31.9682	117	31.24	3.919	C	28.67
754	3864A7E1C	20140803	8:02:02	114.28	31.9683	125	29.24	3.924	C	23.75
755	3864A7E1C	20140803	7:01:13	114.28	31.9681	148	24.24	3.924	B	23.34
756	3864A7E1C	20140803	6:00:58	114.279	31.9679	125	21.24	3.923	B	21.99
757	3864A7E1C	20140803	5:00:50	114.28	31.9679	125	22.24	3.924	B	19.04
758	3864A7E1C	20140803	4:00:46	114.28	31.968	109	22	3.925	B	11.87
759	3864A7E1C	20140802	12:01:13	114.28	31.9681	94	33	3.923	B	12.81
760	3864A7E1C	20140802	11:01:11	114.28	31.968	105	32.24	3.918	B	14.67
761	3864A7E1C	20140802	10:00:56	114.28	31.968	102	32	3.91	B	16.77
762	3864A7E1C	20140802	9:03:42	114.279	31.9681	136	29.24	3.91	D	5.98
763	3864A7E1C	20140802	8:01:30	114.28	31.9681	127	25	3.915	B	0.59
764	3864A7E1C	20140802	7:01:11	114.279	31.9679	102	24.24	3.916	B	20.99
765	3864A7E1C	20140802	6:01:42	114.28	31.9678	138	23.24	3.918	C	27.6
766	3864A7E1C	20140802	5:00:51	114.279	31.9679	124	23.24	3.919	B	14.51
767	3864A7E1C	20140802	4:00:51	114.28	31.9679	137	24	3.919	B	19.11
768	3864A7E1C	20140802	3:00:45	114.28	31.9679	126	23.24	3.92	A	24.53
769	3864A7E1C	20140802	2:01:12	114.28	31.9679	112	23.24	3.921	B	21.69
770	3864A7E1C	20140802	1:01:06	114.28	31.9679	144	24	3.923	B	22.02
771	3864A7E1C	20140802	0:01:05	114.279	31.968	102	24	3.924	B	9.17
772	3864A7E1C	20140801	23:00:53	114.28	31.9678	125	23	3.925	B	30.38
773	3864A7E1C	20140801	22:00:55	114.28	31.9679	125	22.24	3.926	B	20.14
774	3864A7E1C	20140801	21:01:12	114.28	31.9679	131	23	3.927	B	16.5
775	3864A7E1C	20140801	20:00:55	114.28	31.9678	145	23	3.928	B	33.8
776	3864A7E1C	20140801	19:01:13	114.279	31.9679	104	24	3.93	B	24.75
777	3864A7E1C	20140801	18:00:49	114.28	31.9681	101	24	3.931	B	11.85
778	3864A7E1C	20140801	17:01:11	114.28	31.9679	81	24	3.933	B	20.14
779	3864A7E1C	20140801	16:01:06	114.28	31.968	121	25	3.934	B	21.83
780	3864A7E1C	20140801	15:02:12	114.279	31.968	103	31	3.936	C	13.43
781	3864A7E1C	20140801	14:00:56	114.28	31.9681	91	33	3.932	B	5.43
782	3864A7E1C	20140801	13:01:01	114.28	31.968	103	31	3.929	B	16.77
783	3864A7E1C	20140801	12:03:12	114.28	31.968	113	33.24	3.928	D	27.39
784	3864A7E1C	20140801	11:00:56	114.28	31.9681	114	28.24	3.925	B	25.19
785	3864A7E1C	20140801	10:02:12	114.28	31.9683	110	28.24	3.925	C	19.92
786	3864A7E1C	20140801	9:01:42	114.28	31.968	118	28	3.923	C	18.29
787	3864A7E1C	20140801	8:00:56	114.279	31.9681	112	23.24	3.926	B	15.12
788	3864A7E1C	20140801	7:01:30	114.28	31.9681	127	23.24	3.928	B	21.7
789	3864A7E1C	20140801	6:01:14	114.279	31.968	144	23	3.929	B	16.15
790	3864A7E1C	20140801	5:00:49	114.279	31.9681	106	22.24	3.93	B	35.87
791	3864A7E1C	20140801	4:00:55	114.279	31.968	123	22	3.931	B	23.37
792	3864A7E1C	20140801	3:00:45	114.279	31.9681	133	22.24	3.932	A	14.9
793	3864A7E1C	20140801	2:00:55	114.279	31.9681	123	22.24	3.933	B	20.61
794	3864A7E1C	20140801	1:00:55	114.279	31.968	126	21.24	3.934	B	21.24
795	3864A7E1C	20140801	0:00:51	114.279	31.9681	124	21	3.935	B	13.25
796	3864A7E1C	20140731	23:00:48	114.279	31.9679	123	22	3.936	B	22.66
797	3864A7E1C	20140731	22:00:53	114.279	31.9681	137	22	3.937	B	24.59
798	3864A7E1C	20140731	21:00:55	114.279	31.9681	125	22.24	3.938	B	16.8
799	3864A7E1C	20140731	20:00:50	114.279	31.9681	141	23	3.939	B	17.04
800	3864A7E1C	20140731	19:00:48	114.279	31.968	114	24.24	3.94	B	20.54
801	3864A7E1C	20140731	18:01:12	114.279	31.968	130	27	3.942	B	9.58
802	3864A7E1C	20140731	17:01:11	114.279	31.9679	125	31.24	3.941	B	15.08
803	3864A7E1C	20140731	16:02:15	114.279	31.9679	131	28.24	3.942	C	15.29
804	3864A7E1C	20140731	15:01:36	114.279	31.9681	118	31	3.943	C	13.25
805	3864A7E1C	20140731	14:00:50	114.28	31.968	103	33	3.94	B	21.83
806	3864A7E1C	20140731	13:01:30	114.28	31.968	127	31.24	3.935	B	33.52
807	3864A7E1C	20140731	12:01:18	114.279	31.968	84	33.24	3.932	B	14.98
808	3864A7E1C	20140731	11:00:57	114.279	31.968	110	33	3.927	B	17.72
809	3864A7E1C	20140731	10:00:56	114.28	31.9681	113	32.24	3.925	B	25.9
810	3864A7E1C	20140731	9:02:14	114.28	31.9678	82	29	3.924	C	27.17
811	3864A7E1C	20140731	8:03:05	114.28	31.968	120	27	3.931	D	8.51
812	3864A7E1C	20140731	7:01:28	114.28	31.9681	162	24.24	3.932	B	19.68
813	3864A7E1C	20140731	6:01:18	114.278	31.9685	157	22.24	3.934	B	154.21
814	3864A7E1C	20140731	5:00:50	114.279	31.9684	96	23.24	3.934	B	41.79
815	3864A7E1C	20140731	4:00:58	114.28	31.9684	124	23	3.935	B	32.98
816	3864A7E1C	20140731	3:00:55	114.28	31.9683	124	23	3.936	B	26.89
817	3864A7E1C	20140731	2:01:12	114.279	31.9684	104	23.24	3.937	B	32.23
818	3864A7E1C	20140731	1:00:58	114.279	31.9684	117	23	3.939	B	35.17
819	3864A7E1C	20140731	0:01:09	114.279	31.9684	99	23	3.941	B	41.75
820	3864A7E1C	20140730	23:00:57	114.279	31.968	131	23	3.942	B	17.92
821	3864A7E1C	20140730	22:00:55	114.279	31.968	118	23	3.943	B	13.3
822	3864A7E1C	20140730	21:00:55	114.279	31.968	130	22	3.944	B	14.93
823	3864A7E1C	20140730	20:00:55	114.279	31.968	106	23	3.945	B	23.37
824	3864A7E1C	20140730	19:00:58	114.279	31.968	127	24.24	3.946	B	18.34
825	3864A7E1C	20140730	18:01:04	114.279	31.968	119	24.24	3.948	B	10.22
826	3864A7E1C	20140730	17:00:48	114.279	31.968	141	27.24	3.948	B	11.17
827	3864A7E1C	20140730	16:00:59	114.279	31.9682	124	27.24	3.95	B	13.12
828	3864A7E1C	20140730	15:00:54	114.279	31.968	117	25	3.95	B	10.35
829	3864A7E1C	20140730	14:02:14	114.28	31.968	106	34.24	3.945	C	14.31
830	3864A7E1C	20140730	13:00:58	114.28	31.9681	107	33	3.935	B	10.62
831	3864A7E1C	20140730	12:00:56	114.28	31.968	112	33	3.928	B	20.44
832	3864A7E1C	20140730	11:01:14	114.28	31.9679	95	35.24	3.919	B	31.07
833	3864A7E1C	20140730	10:01:42	114.28	31.9681	100	35	4.3	C	13.83
834	3864A7E1C	20140730	8:00:54	114.28	31.9679	121	27	3.914	B	22.77
835	3864A7E1C	20140730	7:00:51	114.28	31.9679	132	24.24	3.913	B	19.83
836	3864A7E1C	20140730	6:00:48	114.279	31.9679	110	23.24	3.914	B	15.6
837	3864A7E1C	20140730	5:00:58	114.279	31.968	121	23.24	3.915	B	17.56
838	3864A7E1C	20140730	4:12:12	114.279	31.968	140	24	3.916	D	16.22
839	3864A7E1C	20140730	3:01:13	114.28	31.968	144	24	3.919	B	19.63
840	3864A7E1C	20140730	2:00:55	114.279	31.968	102	24	3.92	B	16.84
841	3864A7E1C	20140730	1:01:12	114.279	31.968	117	24	3.921	B	18.82
842	3864A7E1C	20140730	0:00:56	114.279	31.968	114	24	3.922	B	19.72
843	3864A7E1C	20140729	23:00:50	114.279	31.968	117	24	3.923	B	19.35
844	3864A7E1C	20140729	22:00:54	114.279	31.9681	130	24	3.924	B	17.04
845	3864A7E1C	20140729	21:01:42	114.279	31.968	67	24.24	3.926	C	5.29
846	3864A7E1C	20140729	20:00:46	114.279	31.9681	105	24.24	3.927	B	20.68
847	3864A7E1C	20140729	19:01:42	114.279	31.968	109	26.24	3.929	C	14.66
848	3864A7E1C	20140729	18:00:55	114.279	31.9679	127	29	3.931	B	25.85
849	3864A7E1C	20140729	17:01:11	114.279	31.968	149	29.24	3.93	B	11.28
850	3864A7E1C	20140729	16:03:27	114.28	31.9681	114	32.24	3.934	D	10.75
851	3864A7E1C	20140729	15:01:43	114.28	31.9681	104	30	3.932	C	12.18
852	3864A7E1C	20140729	14:01:36	114.28	31.9681	126	32.24	3.929	C	15.72
853	3864A7E1C	20140729	13:01:09	114.28	31.9682	105	31	3.925	B	20.91
854	3864A7E1C	20140729	12:02:17	114.28	31.9679	137	32.24	3.925	C	23.43
855	3864A7E1C	20140729	11:01:02	114.28	31.968	89	30.24	3.92	B	18.29
856	3864A7E1C	20140729	10:00:55	114.279	31.968	124	32.24	3.913	B	8.14
857	3864A7E1C	20140729	9:04:15	114.28	31.9681	158	32	3.915	D	19.83
858	3864A7E1C	20140729	8:01:02	114.28	31.9679	116	28.24	3.915	B	16.22
859	3864A7E1C	20140729	7:01:28	114.279	31.9678	114	26	3.915	B	29.01
860	3864A7E1C	20140729	6:01:13	114.279	31.968	118	23.24	3.916	B	25.86
861	3864A7E1C	20140729	5:00:49	114.279	31.968	128	22.24	3.917	B	21.54
862	3864A7E1C	20140729	4:00:59	114.279	31.9681	166	23	3.918	B	13.18
863	3864A7E1C	20140729	3:00:55	114.279	31.9681	122	23	3.919	B	18.92
864	3864A7E1C	20140729	2:01:12	114.279	31.9681	133	23	3.92	B	24.47
865	3864A7E1C	20140729	1:00:58	114.279	31.9679	92	23.24	3.921	B	29.87
866	3864A7E1C	20140729	0:01:01	114.279	31.9681	61	23.24	3.923	B	17.5
867	3864A7E1C	20140728	23:00:47	114.279	31.9678	88	23.24	3.923	B	33.28
868	3864A7E1C	20140728	22:01:09	114.279	31.9681	123	24	3.924	B	20.81
869	3864A7E1C	20140728	21:01:12	114.279	31.9681	141	23.24	3.926	B	18.25
870	3864A7E1C	20140728	20:00:58	114.279	31.9681	100	23.24	3.927	B	39.77
871	3864A7E1C	20140728	19:00:55	114.279	31.968	124	24.24	3.928	B	22.74
872	3864A7E1C	20140728	18:01:12	114.28	31.9681	91	28	3.929	B	8.04
873	3864A7E1C	20140728	17:01:36	114.279	31.9679	135	28.24	3.931	C	16.86
874	3864A7E1C	20140728	16:01:09	114.28	31.9681	152	28.24	3.933	B	4.98
875	3864A7E1C	20140728	15:01:05	114.279	31.968	99	27.24	3.934	B	9.58
876	3864A7E1C	20140728	14:00:55	114.28	31.9679	91	32	3.925	B	21.94
877	3864A7E1C	20140728	13:01:11	114.28	31.968	102	32	3.919	B	14.31
878	3864A7E1C	20140728	12:01:11	114.279	31.9679	102	34.24	3.915	B	20.99
879	3864A7E1C	20140728	11:00:56	114.28	31.968	104	31	3.913	B	25
880	3864A7E1C	20140728	10:02:06	114.28	31.9681	159	35.24	3.907	C	27.15
881	3864A7E1C	20140728	9:01:36	114.279	31.968	85	30	3.903	C	14.93
882	3864A7E1C	20140728	8:01:42	114.28	31.9681	128	28	3.913	C	21.42
883	3864A7E1C	20140727	6:01:42	114.279	31.9681	109	21.24	3.907	C	15.16
884	3864A7E1C	20140727	5:01:12	114.279	31.9681	129	22	3.909	B	14.99
885	3864A7E1C	20140727	4:01:09	114.279	31.9681	127	21.24	3.91	B	24.42
886	3864A7E1C	20140727	3:00:59	114.28	31.9678	161	21	3.911	B	36.23
887	3864A7E1C	20140727	2:01:13	114.279	31.9681	124	21	3.912	B	18.76
888	3864A7E1C	20140727	1:03:06	114.279	31.9681	119	22	3.916	D	17.84
889	3864A7E1C	20140727	0:00:58	114.279	31.9679	135	21.24	3.917	B	35.41
890	3864A7E1C	20140726	23:01:01	114.279	31.968	132	22.24	3.918	B	18.35
891	3864A7E1C	20140726	22:00:54	114.279	31.968	147	22	3.919	B	7.42
892	3864A7E1C	20140726	21:00:49	114.279	31.968	115	21	3.92	B	8.89
893	3864A7E1C	20140726	20:01:07	114.279	31.968	111	22	3.922	B	21.24
894	3864A7E1C	20140726	19:00:59	114.279	31.968	99	23	3.923	B	31.08
895	3864A7E1C	20140726	18:01:04	114.279	31.968	98	26	3.923	B	12.05
896	3864A7E1C	20140726	17:00:48	114.28	31.9679	114	26	3.924	B	16.5
897	3864A7E1C	20140726	16:01:25	114.28	31.9679	142	27	3.926	B	14.28
898	3864A7E1C	20140726	15:01:26	114.28	31.968	140	24.24	3.926	B	12.58
899	3864A7E1C	20140726	14:01:41	114.279	31.9679	111	33.24	3.919	C	21.09
900	3864A7E1C	20140726	13:01:02	114.28	31.968	114	30.24	3.914	B	25.63
901	3864A7E1C	20140726	12:01:01	114.28	31.9679	107	35	3.91	B	25.6
902	3864A7E1C	20140726	11:01:43	114.28	31.9678	91	28.24	3.905	C	35.56
903	3864A7E1C	20140726	10:01:36	114.279	31.968	125	31	3.905	C	5.37
904	3864A7E1C	20140726	9:01:47	114.28	31.9681	113	29.24	3.904	C	27.09
905	3864A7E1C	20140726	8:01:12	114.28	31.968	127	26	3.907	B	9.63
906	3864A7E1C	20140726	7:01:07	114.28	31.9682	88	23.24	3.908	B	40.48
907	3864A7E1C	20140726	6:00:55	114.28	31.9679	127	20.24	3.909	B	21.06
908	3864A7E1C	20140726	5:01:04	114.279	31.968	123	21	3.91	B	13.96
909	3864A7E1C	20140726	4:01:08	114.279	31.9679	94	21.24	3.911	B	37.95
910	3864A7E1C	20140726	3:00:57	114.279	31.9683	109	22	3.912	B	34.02
911	3864A7E1C	20140726	2:01:12	114.279	31.968	118	22.24	3.913	B	18.35
912	3864A7E1C	20140726	1:01:31	114.28	31.9681	149	21	3.915	C	4.98
913	3864A7E1C	20140726	0:00:54	114.279	31.968	125	22	3.916	B	18.82
914	3864A7E1C	20140725	23:00:58	114.279	31.9681	133	22.24	3.917	B	15.16
915	3864A7E1C	20140725	22:01:12	114.279	31.9681	120	23	3.918	B	24.59
916	3864A7E1C	20140725	21:00:58	114.279	31.9679	134	22.24	3.92	B	23.8
917	3864A7E1C	20140725	20:00:53	114.279	31.968	122	23	3.92	B	18.34
918	3864A7E1C	20140725	19:01:48	114.279	31.968	123	24.24	3.922	C	16.84
919	3864A7E1C	20140725	18:00:55	114.28	31.9681	113	27	3.923	B	27.1
920	3864A7E1C	20140725	17:01:11	114.28	31.968	153	27.24	3.924	B	4.05
921	3864A7E1C	20140725	16:01:24	114.28	31.9679	155	32.24	3.926	B	24.75
922	3864A7E1C	20140725	15:00:54	114.28	31.9681	104	34	3.923	B	21.38
923	3864A7E1C	20140725	14:00:54	114.279	31.9679	121	33.24	3.915	B	15.29
924	3864A7E1C	20140725	13:00:52	114.28	31.9681	124	34	3.907	B	30.96
925	3864A7E1C	20140725	12:01:11	114.28	31.9678	115	26	3.905	B	31.17
926	3864A7E1C	20140725	11:00:56	114.28	31.9678	123	25.24	3.905	B	26.53
927	3864A7E1C	20140725	10:01:42	114.28	31.968	151	28.24	3.901	C	35.28
928	3864A7E1C	20140725	8:00:56	114.28	31.968	101	25.24	3.905	B	15.1
929	3864A7E1C	20140725	7:01:12	114.279	31.968	136	23.24	3.905	B	16.22
930	3864A7E1C	20140725	6:02:10	114.279	31.968	155	23	3.907	C	6.69
931	3864A7E1C	20140725	5:02:01	114.279	31.968	113	23	3.909	C	16.84
932	3864A7E1C	20140725	4:00:55	114.279	31.9681	96	24	3.91	B	39.79
933	3864A7E1C	20140725	3:01:22	114.279	31.9681	62	23.24	3.912	B	66.41
934	3864A7E1C	20140725	2:00:56	114.279	31.9679	106	22.24	3.913	B	29.19
935	3864A7E1C	20140725	1:01:12	114.279	31.968	114	23.24	3.914	B	11.78
936	3864A7E1C	20140725	0:00:56	114.279	31.9679	126	22.24	3.915	B	31.76
937	3864A7E1C	20140724	23:01:10	114.279	31.9679	102	23.24	3.916	B	27.16
938	3864A7E1C	20140724	22:01:12	114.279	31.9679	113	24.24	3.918	B	30.02
939	3864A7E1C	20140724	21:01:13	114.279	31.9679	128	25	3.919	B	27
940	3864A7E1C	20140724	20:00:46	114.279	31.968	107	24	3.92	B	25.45
941	3864A7E1C	20140724	19:01:12	114.279	31.9679	108	26	3.921	B	20.87
942	3864A7E1C	20140724	18:00:55	114.28	31.9679	127	26.24	3.922	B	20.14
943	3864A7E1C	20140724	17:01:02	114.28	31.9678	108	26.24	3.923	B	37.29
944	3864A7E1C	20140724	16:01:25	114.28	31.968	125	24.24	3.924	B	11.87
945	3864A7E1C	20140724	15:01:11	114.279	31.968	113	23	3.926	B	5.37
946	3864A7E1C	20140724	14:01:34	114.28	31.9678	102	32	3.919	C	30.99
947	3864A7E1C	20140724	13:01:00	114.28	31.9681	125	30.24	3.91	B	25.19
948	3864A7E1C	20140724	12:01:11	114.28	31.9681	116	30	3.902	B	19.68
949	3864A7E1C	20140724	11:00:59	114.279	31.9678	107	26.24	3.894	B	37.05
950	3864A7E1C	20140724	10:01:24	114.279	31.9676	23	25	3.894	B	55.56
951	3864A7E1C	20140724	9:01:42	114.28	31.9681	176	27.24	3.895	C	17.56
952	3864A7E1C	20140724	8:01:32	114.28	31.9677	169	24	3.899	C	39.41
953	3864A7E1C	20140724	7:01:34	114.28	31.9678	143	23.24	3.901	C	26.53
954	3864A7E1C	20140724	6:04:15	114.279	31.968	129	24.24	3.905	D	20.54
955	3864A7E1C	20140724	5:01:02	114.279	31.9681	117	23	3.906	B	17.04
956	3864A7E1C	20140724	4:00:55	114.279	31.9681	136	23	3.907	B	11.44
957	3864A7E1C	20140724	3:01:12	114.279	31.968	116	23.24	3.908	B	20.99
958	3864A7E1C	20140724	2:01:02	114.279	31.9682	126	23.24	3.909	B	26.17
959	3864A7E1C	20140724	1:01:12	114.279	31.9682	141	24	3.911	B	15.39
960	3864A7E1C	20140724	0:00:56	114.279	31.9681	102	23.24	3.912	B	26.34
961	3864A7E1C	20140723	23:00:55	114.279	31.9681	121	23	3.913	B	18.76
962	3864A7E1C	20140723	22:00:50	114.279	31.9681	117	23	3.914	B	24.59
963	3864A7E1C	20140723	21:00:45	114.279	31.9682	100	23.24	3.915	A	27.95
964	3864A7E1C	20140723	20:00:54	114.279	31.968	118	23.24	3.916	B	19.39
965	3864A7E1C	20140723	19:01:12	114.28	31.9678	108	25	3.917	B	26.51
966	3864A7E1C	20140723	18:01:04	114.28	31.968	118	27.24	3.918	B	24.1
967	3864A7E1C	20140723	17:02:42	114.28	31.968	135	27.24	3.921	C	13.4
968	3864A7E1C	20140723	16:01:29	114.279	31.9679	101	30	3.92	B	22.2
969	3864A7E1C	20140723	15:00:51	114.28	31.968	98	28	3.918	B	12.9
970	3864A7E1C	20140723	14:01:01	114.279	31.9678	63	29.24	3.917	B	32.36
971	3864A7E1C	20140723	13:01:11	114.28	31.9678	106	27.24	3.914	B	29.29
972	3864A7E1C	20140723	12:03:12	114.28	31.968	107	28.24	3.916	D	14.31
973	3864A7E1C	20140723	11:00:57	114.28	31.9679	103	30	3.91	B	20.23
974	3864A7E1C	20140723	10:02:14	114.291	31.9821	3643	26	3.908	C	1928.79
975	3864A7E1C	20140723	9:01:02	114.28	31.968	127	25.24	3.908	B	10.5
976	3864A7E1C	20140723	8:00:56	114.28	31.9679	124	26	3.912	B	18.72
977	3864A7E1C	20140723	7:01:12	114.28	31.9679	143	22	3.913	B	23.16
978	3864A7E1C	20140723	6:01:08	114.279	31.9681	134	22.24	3.914	B	11.07
979	3864A7E1C	20140723	5:01:12	114.279	31.968	130	23	3.915	B	18.34
980	3864A7E1C	20140723	4:01:12	114.279	31.968	131	24	3.916	B	15.51
981	3864A7E1C	20140723	3:00:55	114.279	31.9681	140	23.24	3.917	B	20.81
982	3864A7E1C	20140723	2:01:12	114.279	31.9679	128	23.24	3.919	B	20.86
983	3864A7E1C	20140723	1:01:13	114.279	31.968	124	24	3.92	B	21.03
984	3864A7E1C	20140723	0:01:12	114.279	31.968	125	23.24	3.921	B	25.86
985	3864A7E1C	20140722	23:01:12	114.279	31.9681	93	24	3.923	B	14.99
986	3864A7E1C	20140722	22:01:21	114.279	31.968	126	24.24	3.924	B	37.44
987	3864A7E1C	20140722	21:01:17	114.279	31.9683	83	24	3.926	B	45.96
988	3864A7E1C	20140722	20:01:05	114.279	31.968	94	24	3.927	B	20.1
989	3864A7E1C	20140722	19:01:13	114.279	31.9678	99	26	3.929	B	37.13
990	3864A7E1C	20140722	18:01:13	114.28	31.9679	112	30	3.93	B	15.79
991	3864A7E1C	20140722	17:01:02	114.28	31.9679	116	29.24	3.929	B	19.21
992	3864A7E1C	20140722	16:01:23	114.279	31.9683	133	30.24	3.93	B	20.19
993	3864A7E1C	20140722	15:01:08	114.279	31.9679	110	32	3.93	B	22.57
994	3864A7E1C	20140722	14:02:06	114.28	31.9682	124	41	3.924	C	32.65
995	3864A7E1C	20140722	13:01:00	114.28	31.968	114	38.24	3.914	B	27.39
996	3864A7E1C	20140722	12:01:10	114.279	31.968	64	33.24	3.908	B	14.87
997	3864A7E1C	20140722	11:01:10	114.28	31.968	112	35	3.902	B	13.39
998	3864A7E1C	20140722	10:03:11	114.28	31.968	106	33.24	3.899	D	11.18
999	3864A7E1C	20140722	9:03:05	114.28	31.9683	149	32	3.898	D	28.79
1000	3864A7E1C	20140722	8:01:47	114.28	31.9681	76	28	3.901	C	19.64
1001	3864A7E1C	20140722	7:01:03	114.279	31.968	130	26.24	3.902	B	18.34
1002	3864A7E1C	20140722	6:01:37	114.279	31.9679	119	23	3.904	C	24.75
1003	3864A7E1C	20140722	5:00:54	114.279	31.9679	123	22.24	3.904	B	16.86
1004	3864A7E1C	20140722	4:01:12	114.28	31.9679	149	23	3.905	B	23.1
1005	3864A7E1C	20140722	3:00:49	114.28	31.9679	105	22.24	3.907	B	19.04
1006	3864A7E1C	20140722	2:00:57	114.279	31.9678	117	22	3.908	B	25.52
1007	3864A7E1C	20140722	1:01:12	114.28	31.9681	123	23	3.909	B	10.08
1008	3864A7E1C	20140722	0:00:52	114.28	31.9679	124	22.24	3.91	B	20.82
1009	3864A7E1C	20140721	23:00:55	114.279	31.9678	122	22.24	3.911	B	27.74
1010	3864A7E1C	20140721	22:01:07	114.279	31.9679	131	22.24	3.912	B	22.2
1011	3864A7E1C	20140721	21:00:59	114.28	31.968	111	23	3.913	B	9.89
1012	3864A7E1C	20140721	15:01:13	114.28	31.968	102	35.24	3.912	B	12.52
1013	3864A7E1C	20140721	14:00:57	114.28	31.9679	128	36	3.901	B	40.75
1014	3864A7E1C	20140721	13:01:11	114.28	31.9679	136	39	3.887	B	21.09
1015	3864A7E1C	20140721	12:01:11	114.28	31.9681	103	33.24	3.87	B	8.21
1016	3864A7E1C	20140721	11:01:16	114.28	31.968	93	33	3.859	B	7.4
1017	3864A7E1C	20140721	10:01:43	114.28	31.9681	84	31	3.85	C	15.01
1018	3864A7E1C	20140721	9:02:10	114.279	31.9682	138	31.24	3.844	C	13.82
1019	3864A7E1C	20140721	8:01:35	114.28	31.968	137	30	3.846	C	26.12
1020	3864A7E1C	20140721	7:02:12	114.28	31.968	149	27	3.847	C	10.5
1021	3864A7E1C	20140721	6:01:14	114.279	31.968	115	23	3.847	B	15.75
1022	3864A7E1C	20140721	5:00:59	114.279	31.968	116	23	3.849	B	20.1
1023	3864A7E1C	20140721	4:00:58	114.279	31.9681	121	24	3.851	B	17.04
1024	3864A7E1C	20140721	3:01:12	114.279	31.968	106	24	3.853	B	22.87
1025	3864A7E1C	20140721	2:01:17	114.279	31.9681	119	23	3.855	B	14.89
1026	3864A7E1C	20140721	1:01:00	114.279	31.9681	100	22.24	3.858	B	24.42
1027	3864A7E1C	20140720	19:00:55	114.28	31.9679	109	25.24	3.873	B	21.94
1028	3864A7E1C	20140720	18:01:52	114.279	31.9679	132	28.24	3.876	C	21.99
1029	3864A7E1C	20140720	17:02:15	114.279	31.9679	116	29.24	3.879	C	22.59
1030	3864A7E1C	20140720	16:01:39	114.28	31.9683	154	31.24	3.881	C	24.98
1031	3864A7E1C	20140720	15:00:57	114.28	31.9681	167	34.24	3.874	B	40.45
1032	3864A7E1C	20140720	14:01:19	114.28	31.968	140	32.24	3.859	B	33.9
1033	3864A7E1C	20140720	13:01:14	114.279	31.9682	140	29.24	3.854	B	13.83
1034	3864A7E1C	20140720	12:01:11	114.279	31.9681	157	32.24	3.853	B	37.78
1035	3864A7E1C	20140720	11:01:28	114.28	31.9678	116	32.24	3.845	B	28.67
1036	3864A7E1C	20140720	10:01:11	114.28	31.9681	135	33	3.841	B	25.9
1037	3864A7E1C	20140720	8:00:54	114.28	31.9679	162	27.24	3.833	B	36.65
1038	3864A7E1C	20140720	7:05:03	114.279	31.9679	136	26	3.836	D	15.6
1039	3864A7E1C	20140720	6:01:04	114.28	31.9679	102	23.24	3.837	B	17.61
1040	3864A7E1C	20140720	5:01:34	114.279	31.9679	120	23	3.838	C	20.41
1041	3864A7E1C	20140720	4:00:55	114.28	31.9679	131	23	3.839	B	20.62
1042	3864A7E1C	20140720	3:01:07	114.279	31.9678	129	23.24	3.84	B	31.34
1043	3864A7E1C	20140720	2:00:58	114.28	31.968	125	22.24	3.841	B	25.19
1044	3864A7E1C	20140720	1:00:58	114.28	31.968	113	23.24	3.842	B	12.9
1045	3864A7E1C	20140720	0:00:50	114.279	31.9679	100	23.24	3.846	B	16.86
1046	3864A7E1C	20140719	23:01:01	114.28	31.9679	123	23.25	3.85	B	20.57
1047	3864A7E1C	20140719	22:01:27	114.28	31.9683	130	23.25	3.855	B	39.55
1048	3864A7E1C	20140719	21:01:24	114.279	31.9679	117	23.25	3.861	B	18.53
1049	3864A7E1C	20140719	20:00:55	114.279	31.9678	16	24	3.866	B	41.41
1050	3864A7E1C	20140719	19:00:55	114.28	31.9678	101	24.25	3.873	B	32.03
1051	3864A7E1C	20140719	18:00:52	114.28	31.9679	125	27.25	3.879	B	21.06
1052	3864A7E1C	20140719	17:00:57	114.28	31.968	116	27	3.878	B	37.6
1053	3864A7E1C	20140719	16:00:55	114.279	31.968	117	24.25	3.881	B	14.87
1054	3864A7E1C	20140719	15:01:09	114.28	31.9679	130	23	3.884	B	20.08
1055	3864A7E1C	20140719	14:00:56	114.28	31.9681	139	32.25	3.878	B	37.7
1056	3864A7E1C	20140719	13:00:59	114.279	31.968	133	29	3.868	B	16.45
1057	3864A7E1C	20140719	12:01:15	114.28	31.9679	109	32.25	3.868	B	23.05
1058	3864A7E1C	20140719	11:00:54	114.279	31.9678	95	28	3.866	B	26.52
1060	3864A7E1C	20140719	9:00:59	114.28	31.9684	152	28.25	3.877	B	41.61
1061	3864A7E1C	20140719	8:00:54	114.28	31.968	152	27	3.885	B	28.33
1062	3864A7E1C	20140719	7:03:16	114.28	31.9679	158	24.25	3.888	D	52.43
1064	3864A7E1C	20140719	5:01:12	114.28	31.9679	143	22.25	3.901	B	22.62
1065	3864A7E1C	20140719	4:00:55	114.28	31.9679	137	23	3.904	B	22.05
1066	3864A7E1C	20140719	3:00:49	114.28	31.9679	111	22.25	3.907	B	20.92
1067	3864A7E1C	20140719	2:01:04	114.28	31.9679	116	23	3.91	B	18.58
1068	3864A7E1C	20140719	1:00:57	114.28	31.9679	106	23	3.912	B	20.92
1069	3864A7E1C	20140719	0:01:02	114.28	31.9679	117	23.25	3.915	B	19.96
1070	3864A7E1C	20140718	23:01:02	114.28	31.9679	140	23.25	3.918	B	19.04
1071	3864A7E1C	20140718	22:00:45	114.279	31.9679	123	23.25	3.922	A	18.89
1072	3864A7E1C	20140718	21:00:46	114.279	31.9682	22	23	3.928	B	26.14
1073	3864A7E1C	20140718	20:00:43	114.279	31.9679	106	22	3.932	A	20.71
1074	3864A7E1C	20140718	19:00:36	114.28	31.9682	157	24	3.935	A	10.29
1075	3864A7E1C	20140718	18:01:21	114.28	31.9681	127	30.25	3.94	B	33.77
1076	3864A7E1C	20140718	17:00:35	114.28	31.9681	136	31.25	3.936	A	27.1
1077	3864A7E1C	20140718	15:00:42	114.28	31.9679	182	27.25	3.934	A	38.49
1078	3864A7E1C	20140718	14:00:39	114.28	31.968	126	26	3.934	A	45.07
1079	3864A7E1C	20140718	13:00:33	114.28	31.9682	140	29	3.929	A	24.68
1080	3864A7E1C	20140718	12:00:56	114.279	31.9677	153	28	3.927	B	39.91
1081	3864A7E1C	20140718	11:00:39	114.279	31.9679	109	29.25	3.926	A	18.89
1082	3864A7E1C	20140718	10:00:51	114.279	31.968	75	27	3.924	B	6.69
1083	3864A7E1C	20140718	9:00:31	114.28	31.9683	91	26.25	3.925	A	33.56
1084	3864A7E1C	20140718	8:00:28	114.279	31.968	7	21	3.93	A	49.49
1085	3864A7E1C	20140718	7:00:42	114.28	31.9684	101	20.24	3.93	A	32.36
1086	3864A7E1C	20140718	6:00:26	114.28	31.9681	98	20	3.93	A	6.76
1087	3864A7E1C	20140718	5:00:42	114.28	31.9678	123	23	3.931	A	27.6
1088	3864A7E1C	20140718	4:00:42	114.28	31.9678	111	21.24	3.931	A	34.78
1089	3864A7E1C	20140718	3:00:23	114.28	31.9679	133	21.24	3.931	A	20.14
1090	3864A7E1C	20140718	2:00:58	114.279	31.9682	66	22	3.933	B	29.76
1091	3864A7E1C	20140718	1:00:47	114.28	31.9687	153	20.24	3.934	B	80.2
1092	3864A7E1C	20140718	0:00:25	114.279	31.9683	163	21	3.934	A	32.26
1093	3864B03DB	20140811	23:01:30	114.28	31.9679	129	25.24	3.855	B	17.95
1094	3864B03DB	20140811	22:00:55	114.28	31.9678	116	20.24	3.856	B	25.64
1095	3864B03DB	20140811	21:00:52	114.28	31.9679	134	20.24	3.857	B	19.21
1096	3864B03DB	20140811	20:00:55	114.279	31.9679	113	20	3.858	B	22.59
1097	3864B03DB	20140811	19:00:55	114.28	31.9679	104	24.24	3.859	B	16.34
1098	3864B03DB	20140811	18:01:12	114.28	31.9678	121	25.24	3.861	B	28.95
1099	3864B03DB	20140811	17:01:00	114.28	31.9679	140	20	3.862	B	24.4
1100	3864B03DB	20140811	16:00:55	114.28	31.968	116	20	3.863	B	5.63
1101	3864B03DB	20140811	15:00:49	114.279	31.968	115	24.24	3.863	B	13.07
1102	3864B03DB	20140811	14:00:56	114.28	31.9679	112	25	3.862	B	15.22
1103	3864B03DB	20140811	13:01:38	114.279	31.968	155	23.24	3.863	C	12.05
1104	3864B03DB	20140811	12:01:30	114.28	31.9679	138	23.24	3.865	B	19.27
1105	3864B03DB	20140811	11:01:02	114.28	31.9681	135	25	3.865	B	24.05
1106	3864B03DB	20140811	10:00:55	114.28	31.9678	102	23.24	3.864	B	34.12
1107	3864B03DB	20140811	9:01:26	114.279	31.9679	96	24.24	3.862	B	22.74
1108	3864B03DB	20140811	8:02:35	114.279	31.9678	89	24	3.873	C	42.06
1109	3864B03DB	20140811	7:01:19	114.28	31.968	129	23.24	3.875	B	10.75
1110	3864B03DB	20140811	6:01:08	114.279	31.9681	132	24	3.876	B	13.25
1111	3864B03DB	20140811	5:01:12	114.279	31.9681	101	25	3.879	B	26.37
1112	3864B03DB	20140811	4:01:12	114.279	31.968	128	20.24	3.881	B	17.92
1113	3864B03DB	20140811	3:01:42	114.279	31.9681	138	21	3.884	C	13.25
1114	3864B03DB	20140811	2:01:13	114.279	31.968	147	21	3.887	B	12.72
1115	3864B03DB	20140811	1:01:13	114.279	31.968	119	21.24	3.889	B	22.29
1116	3864B03DB	20140811	0:01:04	114.279	31.968	124	21	3.891	B	16.15
1117	3864B03DB	20140810	23:01:12	114.279	31.968	127	21	3.893	B	19.39
1118	3864B03DB	20140810	22:00:59	114.279	31.968	120	20.24	3.895	B	13.96
1119	3864B03DB	20140810	21:00:59	114.279	31.968	119	21	3.897	B	23.24
1120	3864B03DB	20140810	20:01:06	114.279	31.9682	140	21.24	3.899	B	13.95
1121	3864B03DB	20140810	19:00:54	114.279	31.968	128	21	3.901	B	16.61
1122	3864B03DB	20140810	18:01:56	114.279	31.9679	118	24.24	3.905	C	15.6
1123	3864B03DB	20140810	17:01:02	114.279	31.968	131	25.24	3.904	B	9.58
1124	3864B03DB	20140810	16:01:02	114.28	31.968	132	25.24	3.904	B	10.75
1125	3864B03DB	20140810	15:01:26	114.279	31.9678	75	25.24	3.905	B	30.64
1126	3864B03DB	20140810	14:00:56	114.28	31.9679	104	25	3.905	B	15.36
1127	3864B03DB	20140810	13:01:28	114.28	31.968	124	25	3.906	B	9.89
1128	3864B03DB	20140810	12:01:31	114.279	31.9678	68	25.24	3.907	C	34.21
1129	3864B03DB	20140810	11:01:16	114.28	31.9679	114	25.24	3.906	B	24.93
1130	3864B03DB	20140810	10:01:11	114.279	31.9679	111	24	3.904	B	19.33
1131	3864B03DB	20140810	9:01:28	114.279	31.9676	62	26	3.9	B	65.07
1132	3864B03DB	20140810	8:01:40	114.279	31.9682	132	20.24	3.907	C	11.8
1133	3864B03DB	20140810	7:00:59	114.279	31.968	134	24.24	3.908	B	10.85
1134	3864B03DB	20140810	6:01:12	114.279	31.968	112	24	3.909	B	17.58
1135	3864B03DB	20140810	5:01:28	114.279	31.9678	81	20.24	3.911	B	42.97
1136	3864B03DB	20140810	4:01:32	114.279	31.968	102	20.24	3.912	C	23.37
1137	3864B03DB	20140810	3:01:05	114.279	31.9679	128	20.24	3.913	B	20.5
1138	3864B03DB	20140810	2:02:04	114.279	31.9683	92	20	3.917	C	32.87
1139	3864B03DB	20140810	1:01:18	114.279	31.9681	121	25.24	3.918	B	18.78
1140	3864B03DB	20140810	0:00:54	114.279	31.9681	121	20.24	3.919	B	11.18
1141	3864B03DB	20140809	23:01:09	114.279	31.968	124	20	3.92	B	21.54
1142	3864B03DB	20140809	22:00:52	114.279	31.9681	136	25	3.921	B	15.16
1143	3864B03DB	20140809	21:01:03	114.279	31.9681	120	24	3.922	B	27.28
1144	3864B03DB	20140809	20:00:47	114.279	31.9681	119	21	3.923	B	11.21
1145	3864B03DB	20140809	19:01:07	114.28	31.9679	116	20.24	3.924	B	24.53
1146	3864B03DB	20140809	18:01:12	114.279	31.9677	98	21.24	3.925	B	43.86
1147	3864B03DB	20140809	17:00:51	114.28	31.9679	129	21	3.926	B	30.02
1148	3864B03DB	20140809	16:00:51	114.279	31.968	119	25.24	3.927	B	16.61
1149	3864B03DB	20140809	15:00:57	114.279	31.9677	30	21	3.928	B	47.11
1150	3864B03DB	20140809	14:01:32	114.28	31.9679	101	21	3.93	C	21.69
1151	3864B03DB	20140809	13:01:01	114.28	31.9679	123	25.24	3.931	B	19.21
1152	3864B03DB	20140809	12:11:57	114.28	31.9679	101	22	3.931	D	19.68
1153	3864B03DB	20140809	11:01:11	114.28	31.9679	117	23	3.932	B	24.28
1154	3864B03DB	20140809	10:01:31	114.28	31.9678	4	25.24	3.933	C	28.94
1155	3864B03DB	20140809	9:00:54	114.279	31.968	66	21	3.931	B	18.35
1156	3864B03DB	20140809	8:00:54	114.279	31.968	131	21	3.937	B	5.29
1157	3864B03DB	20140809	7:00:54	114.28	31.968	110	20.24	3.938	B	8.51
1158	3864B03DB	20140809	6:01:01	114.28	31.9679	126	25.24	3.939	B	15.39
1159	3864B03DB	20140809	5:00:54	114.279	31.9678	117	21	3.94	B	25.34
1160	3864B03DB	20140809	4:00:51	114.28	31.9679	117	21	3.941	B	21.23
1161	3864B03DB	20140809	3:00:49	114.28	31.9679	136	21	3.942	B	25.46
1162	3864B03DB	20140809	2:01:12	114.28	31.9678	124	20.24	3.943	B	25.64
1163	3864B03DB	20140809	1:00:49	114.28	31.9681	137	21	3.944	B	4.56
1164	3864B03DB	20140809	0:00:56	114.279	31.9679	107	20.24	3.945	B	17.52
1165	3864B03DB	20140808	23:00:50	114.28	31.9679	135	21.24	3.946	B	18.58
1166	3864B03DB	20140808	22:00:55	114.28	31.9679	116	21	3.947	B	24.53
1167	3864B03DB	20140808	21:00:55	114.28	31.9679	131	21.24	3.948	B	21.26
1168	3864B03DB	20140808	20:00:55	114.28	31.9677	135	21.24	3.95	B	46.55
1169	3864B03DB	20140808	19:00:53	114.28	31.9679	113	23	3.95	B	18.72
1170	3864B03DB	20140808	18:01:04	114.28	31.9679	129	22.24	3.953	B	16.87
1171	3864B03DB	20140808	17:00:49	114.28	31.9678	156	24	3.953	B	31.77
1172	3864B03DB	20140808	16:01:04	114.279	31.9679	112	25	3.953	B	16.41
1173	3864B03DB	20140808	15:01:19	114.28	31.9678	118	25	3.954	B	26.74
1174	3864B03DB	20140808	14:01:11	114.279	31.968	100	25	3.953	B	21.03
1175	3864B03DB	20140808	13:00:50	114.279	31.968	100	25.24	3.953	B	11.28
1176	3864B03DB	20140808	12:01:01	114.28	31.968	143	24.24	3.951	B	12.08
1177	3864B03DB	20140808	11:00:55	114.279	31.968	151	23.24	3.95	B	16.22
1178	3864B03DB	20140808	10:01:11	114.28	31.9678	100	23	3.949	B	36.26
1179	3864B03DB	20140808	9:02:31	114.279	31.968	105	23.24	3.949	C	11.96
1180	3864B03DB	20140808	8:01:42	114.28	31.9679	113	21.24	3.957	C	14.28
1181	3864B03DB	20140808	7:01:03	114.28	31.9678	103	20.24	3.958	B	34.78
1182	3864B03DB	20140808	6:00:54	114.279	31.9679	145	24.24	3.959	B	16.81
1183	3864B03DB	20140808	5:00:51	114.28	31.9678	129	21	3.96	B	28.21
1184	3864B03DB	20140808	4:01:12	114.28	31.9679	124	25	3.962	B	22.21
1185	3864B03DB	20140808	3:00:54	114.279	31.9678	106	25.24	3.963	B	26.63
1186	3864B03DB	20140808	2:00:55	114.28	31.9679	128	25	3.964	B	18.72
1187	3864B03DB	20140808	1:01:12	114.279	31.9679	115	25	3.965	B	24.75
1188	3864B03DB	20140808	0:00:52	114.28	31.9679	115	24	3.966	B	16.5
1189	3864B03DB	20140807	23:00:47	114.28	31.9679	131	24	3.967	B	23.43
1190	3864B03DB	20140807	22:00:55	114.28	31.9679	126	24	3.968	B	20.62
1191	3864B03DB	20140807	21:00:49	114.28	31.9679	134	25.24	3.968	B	17.61
1192	3864B03DB	20140807	20:01:12	114.279	31.9678	97	20	3.97	B	37.05
1193	3864B03DB	20140807	19:00:51	114.28	31.9679	119	23.24	3.971	B	17.95
1194	3864B03DB	20140807	18:00:49	114.28	31.9679	114	24	3.972	B	22.05
1195	3864B03DB	20140807	17:01:11	114.28	31.9679	129	20.24	3.973	B	21.09
1196	3864B03DB	20140807	16:01:02	114.28	31.9679	116	25.24	3.975	B	24.93
1197	3864B03DB	20140807	15:01:16	114.28	31.9681	145	23.24	3.975	B	12.24
1198	3864B03DB	20140807	14:00:55	114.28	31.9681	106	20.24	3.977	B	14.25
1199	3864B03DB	20140807	13:02:30	114.28	31.9678	113	22	3.978	C	26.51
1200	3864B03DB	20140807	12:02:12	114.28	31.9678	128	25.24	3.981	C	28.2
1201	3864B03DB	20140807	11:01:43	114.279	31.968	114	24.24	3.983	C	15.42
1202	3864B03DB	20140807	10:02:08	114.28	31.9682	162	20.24	3.986	C	13.67
1203	3864B03DB	20140807	9:03:11	114.279	31.968	103	24.24	3.988	D	21.54
1204	3864B03DB	20140807	8:02:00	114.28	31.9685	165	24	3.997	C	46.99
1205	3864B03DB	20140807	7:00:56	114.279	31.968	158	21.24	3.998	B	11.78
1206	3864B03DB	20140807	6:01:12	114.28	31.9678	117	22	4	B	27.62
1207	3864B03DB	20140807	5:00:54	114.28	31.9679	126	22.24	4.001	B	21.26
1208	3864B03DB	20140807	4:00:50	114.28	31.968	114	22	4.002	B	9.63
1209	3864B03DB	20140807	3:00:55	114.279	31.9679	100	22	4.003	B	24.22
1210	3864B03DB	20140807	2:01:19	114.28	31.9679	105	24	4.004	B	16.34
1211	3864B03DB	20140807	1:02:39	114.28	31.968	129	24.24	4.008	C	13.4
1212	3864B03DB	20140807	0:00:56	114.279	31.9679	125	24.24	4.009	B	17.79
1213	3864B03DB	20140806	23:00:47	114.28	31.9679	140	25.24	4.01	B	22.77
1214	3864B03DB	20140806	22:00:55	114.28	31.9679	122	21	4.011	B	25.46
1215	3864B03DB	20140806	21:01:05	114.28	31.9679	131	22.24	4.012	B	23.1
1216	3864B03DB	20140806	20:00:57	114.279	31.9681	98	22	4.014	B	3.87
1217	3864B03DB	20140806	19:01:09	114.279	31.968	88	22	4.015	B	23.24
1218	3864B03DB	20140806	18:00:55	114.279	31.9679	113	22	4.017	B	29.29
1219	3864B03DB	20140806	17:01:34	114.28	31.968	135	23	4.019	C	29.28
1220	3864B03DB	20140806	16:01:04	114.279	31.9679	121	23.24	4.02	B	20.41
1221	3864B03DB	20140806	15:00:54	114.279	31.9679	100	25	4.022	B	21.49
1222	3864B03DB	20140806	14:01:03	114.28	31.968	113	27	4.022	B	13.64
1223	3864B03DB	20140806	13:00:55	114.28	31.9679	111	25	4.021	B	24.93
1224	3864B03DB	20140806	12:01:11	114.28	31.9678	126	23	4.021	B	30.97
1225	3864B03DB	20140806	11:12:41	114.279	31.9681	62	24.24	4.022	D	13.07
1226	3864B03DB	20140806	10:00:56	114.279	31.968	123	25.24	4.024	B	14.98
1227	3864B03DB	20140806	9:01:38	114.279	31.9681	134	25	4.024	C	3.09
1228	3864B03DB	20140806	8:02:39	114.28	31.9684	150	25	4.042	C	35.43
1229	3864B03DB	20140806	7:00:56	114.279	31.9681	118	23	4.044	B	11.44
1230	3864B03DB	20140806	6:01:43	114.28	31.968	172	23.24	4.046	C	7.4
1231	3864B03DB	20140806	5:01:09	114.279	31.968	106	23	4.048	B	23.24
1232	3864B03DB	20140806	4:00:53	114.279	31.968	124	23	4.049	B	26.83
1233	3864B03DB	20140806	3:01:12	114.279	31.968	127	22.24	4.051	B	12.2
1234	3864B03DB	20140806	2:01:13	114.279	31.9681	108	22.24	4.053	B	15.16
1235	3864B03DB	20140806	1:01:08	114.279	31.9679	109	23	4.055	B	25.48
1236	3864B03DB	20140806	0:01:02	114.279	31.9681	120	23.24	4.056	B	13.1
1237	3864B03DB	20140805	23:00:53	114.279	31.968	120	23	4.058	B	22.29
1238	3864B03DB	20140805	22:01:12	114.279	31.9679	132	23.24	4.059	B	16.81
1239	3864B03DB	20140805	21:00:55	114.279	31.9681	124	23	4.061	B	14.31
1240	3864B03DB	20140805	20:00:53	114.279	31.9682	157	23.24	4.062	B	12.35
1241	3864B03DB	20140805	19:00:55	114.279	31.9681	113	23.24	4.063	B	18.78
1242	3864B03DB	20140805	18:01:25	114.279	31.9679	94	25.24	4.066	B	23.43
1243	3864B03DB	20140805	17:01:13	114.28	31.9681	160	26.24	4.068	B	31.04
1244	3864B03DB	20140805	16:01:06	114.28	31.9681	143	25	4.069	B	23.46
1245	3864B03DB	20140805	15:00:56	114.279	31.9682	93	29	4.068	B	29.04
1246	3864B03DB	20140805	14:01:04	114.279	31.968	71	26.24	4.065	B	10.04
1248	3864B03DB	20140805	12:01:11	114.28	31.968	92	20.24	4.073	B	17.3
1249	3864B03DB	20140805	11:01:02	114.279	31.968	115	28.24	4.072	B	19.93
1250	3864B03DB	20140805	10:01:28	114.279	31.968	118	31	4.07	B	14.41
1251	3864B03DB	20140805	9:01:37	114.28	31.9682	169	30.24	4.066	C	37.39
1252	3864B03DB	20140805	8:01:22	114.28	31.9686	213	28	4.07	B	62.03
1254	3864B03DB	20140805	6:01:30	114.279	31.968	118	23	4.082	B	13.9
1255	3864B03DB	20140805	5:00:54	114.279	31.9681	113	22.24	4.083	B	45.81
1256	3864B03DB	20140805	4:00:51	114.279	31.9682	145	23	4.085	B	16.02
1257	3864B03DB	20140805	3:00:57	114.279	31.9681	122	22.24	4.086	B	14.99
1258	3864B03DB	20140805	2:01:12	114.279	31.9679	112	23	4.088	B	24.22
1259	3864B03DB	20140805	1:01:10	114.279	31.968	110	23	4.09	B	18.82
1260	3864B03DB	20140805	0:01:12	114.279	31.9681	138	23.24	4.092	B	16.8
1261	3864B03DB	20140804	23:00:57	114.279	31.9681	140	23.24	4.094	B	5.38
1262	3864B03DB	20140804	22:01:12	114.279	31.968	125	24	4.096	B	16.61
1263	3864B03DB	20140804	21:00:57	114.279	31.9681	121	23.24	4.098	B	17.04
1264	3864B03DB	20140804	20:01:03	114.279	31.9681	129	24	4.1	B	20.78
1265	3864B03DB	20140804	19:00:55	114.279	31.968	103	24	4.102	B	26.63
1266	3864B03DB	20140804	18:00:55	114.28	31.9679	93	26	4.103	B	25.6
1267	3864B03DB	20140804	17:00:49	114.279	31.968	110	28.24	4.104	B	15.75
1268	3864B03DB	20140804	16:01:03	114.279	31.968	125	29	4.106	B	13.58
1269	3864B03DB	20140804	15:00:51	114.279	31.9681	124	32.24	4.105	B	13.18
1270	3864B03DB	20140804	14:01:11	114.279	31.9681	123	32.24	4.1	B	12.99
1271	3864B03DB	20140804	13:01:42	114.279	31.968	108	30.24	4.094	C	14.41
1272	3864B03DB	20140804	12:01:20	114.28	31.968	139	33	4.094	B	8.81
1273	3864B03DB	20140804	11:01:03	114.28	31.9682	80	33	4.087	B	17.38
1274	3864B03DB	20140804	10:00:56	114.28	31.9681	92	30	4.079	B	15.66
1275	3864B03DB	20140804	9:01:11	114.28	31.9681	122	30.24	4.075	B	0.77
1276	3864B03DB	20140804	8:02:39	114.279	31.9682	160	28.24	4.082	C	14.29
1277	3864B03DB	20140804	7:01:03	114.28	31.968	166	24.24	4.083	B	17.44
1278	3864B03DB	20140804	6:00:54	114.28	31.9681	121	22	4.084	B	21.38
1279	3864B03DB	20140804	5:01:12	114.28	31.9678	124	22	4.086	B	28.2
1280	3864B03DB	20140804	4:00:51	114.28	31.9679	116	22	4.087	B	19.83
1281	3864B03DB	20140804	3:00:48	114.28	31.9679	126	21.24	4.089	B	16.87
1282	3864B03DB	20140804	2:01:12	114.28	31.9679	130	22	4.091	B	18.49
1283	3864B03DB	20140804	1:01:44	114.28	31.9678	141	22	4.094	C	28.78
1284	3864B03DB	20140804	0:01:06	114.28	31.9679	132	22.24	4.096	B	23.43
1285	3864B03DB	20140803	23:00:58	114.28	31.9679	136	22.24	4.097	B	19.21
1286	3864B03DB	20140803	22:00:49	114.28	31.9679	140	22.24	4.099	B	25.88
1287	3864B03DB	20140803	21:01:12	114.28	31.968	133	23	4.101	B	13.64
1288	3864B03DB	20140803	20:00:52	114.28	31.9679	114	23.24	4.102	B	14.1
1289	3864B03DB	20140803	19:01:00	114.279	31.9683	121	25	4.104	B	31.23
1290	3864B03DB	20140803	18:01:10	114.28	31.9679	140	27.24	4.106	B	47.58
1291	3864B03DB	20140803	17:01:11	114.28	31.968	130	30	4.109	B	8.81
1292	3864B03DB	20140803	16:00:58	114.28	31.9679	87	29.24	4.105	B	16.5
1293	3864B03DB	20140803	15:01:48	114.28	31.9679	114	33.24	4.105	C	19.83
1294	3864B03DB	20140803	14:01:13	114.279	31.9682	5	34	4.097	B	54.32
1295	3864B03DB	20140803	13:01:54	114.279	31.9684	109	34.24	4.087	C	38.04
1296	3864B03DB	20140803	12:01:32	114.28	31.968	110	34.24	4.076	C	22.79
1297	3864B03DB	20140803	11:01:09	114.28	31.9682	94	34.24	4.069	B	18.49
1298	3864B03DB	20140803	10:00:57	114.279	31.9682	89	32	4.057	B	21.09
1299	3864B03DB	20140803	8:02:35	114.279	31.9681	115	29	4.053	C	12.11
1300	3864B03DB	20140803	7:01:08	114.28	31.9681	123	25	4.051	B	13.75
1301	3864B03DB	20140803	6:01:26	114.28	31.9679	153	21.24	4.052	B	24.07
1302	3864B03DB	20140803	5:01:12	114.279	31.9681	123	21.24	4.054	B	20.95
1303	3864B03DB	20140803	4:00:55	114.279	31.9682	151	21.24	4.055	B	29.26
1304	3864B03DB	20140803	3:00:59	114.279	31.968	119	22	4.056	B	24.96
1305	3864B03DB	20140803	2:00:56	114.279	31.9681	117	21.24	4.058	B	13.1
1306	3864B03DB	20140803	1:01:04	114.279	31.9679	105	22	4.059	B	33.77
1307	3864B03DB	20140803	0:01:12	114.279	31.9681	119	22.24	4.061	B	11.44
1308	3864B03DB	20140802	23:00:55	114.279	31.9681	116	22	4.063	B	16.86
1309	3864B03DB	20140802	22:01:03	114.28	31.9681	154	22	4.065	B	8.52
1310	3864B03DB	20140802	21:01:30	114.279	31.9679	139	23	4.067	B	38.84
1311	3864B03DB	20140802	20:00:52	114.279	31.9682	112	23	4.069	B	30.55
1312	3864B03DB	20140802	19:00:58	114.279	31.968	77	25.24	4.07	B	42.24
1313	3864B03DB	20140802	18:01:03	114.28	31.9681	107	28.24	4.072	B	8.16
1314	3864B03DB	20140802	17:01:41	114.279	31.9681	127	27.24	4.072	C	20.81
1315	3864B03DB	20140802	16:01:56	114.279	31.968	106	25.24	4.073	C	9.17
1316	3864B03DB	20140802	15:01:32	114.28	31.9681	192	23	4.073	C	3.7
1317	3864B03DB	20140802	14:00:55	114.28	31.968	117	29	4.064	B	26.65
1318	3864B03DB	20140802	13:00:56	114.28	31.9679	135	34	4.058	B	22.05
1319	3864B03DB	20140802	12:01:11	114.28	31.968	117	33.24	4.05	B	12.52
1320	3864B03DB	20140802	11:01:01	114.28	31.9678	96	35.24	4.044	B	45.73
1321	3864B03DB	20140802	10:01:22	114.28	31.9678	156	31.24	4.036	B	33.11
1322	3864B03DB	20140802	9:01:11	114.279	31.9681	133	27	4.032	B	3.5
1323	3864B03DB	20140802	8:01:42	114.279	31.9681	119	24	4.038	C	5.57
1324	3864B03DB	20140802	7:01:02	114.28	31.968	135	24	4.039	B	22.61
1325	3864B03DB	20140802	6:01:12	114.279	31.968	130	22.24	4.041	B	22.74
1326	3864B03DB	20140802	5:01:22	114.279	31.968	132	22.24	4.043	B	20.1
1327	3864B03DB	20140802	4:01:12	114.279	31.968	130	23	4.045	B	15.75
1328	3864B03DB	20140802	3:01:01	114.279	31.968	120	22.24	4.046	B	19.03
1329	3864B03DB	20140802	2:01:12	114.279	31.9681	127	22.24	4.049	B	16.79
1330	3864B03DB	20140802	1:00:55	114.279	31.968	110	22.24	4.05	B	17.27
1331	3864B03DB	20140802	0:00:56	114.279	31.9681	130	22.24	4.051	B	15.67
1332	3864B03DB	20140801	23:01:18	114.279	31.9681	133	22	4.054	B	11.44
1333	3864B03DB	20140801	22:01:13	114.279	31.9681	130	21.24	4.055	B	16.79
1334	3864B03DB	20140801	21:01:05	114.279	31.9681	131	22.24	4.057	B	23.62
1335	3864B03DB	20140801	20:00:55	114.279	31.968	120	23	4.058	B	21.24
1336	3864B03DB	20140801	19:01:48	114.279	31.968	113	24	4.061	C	16.22
1337	3864B03DB	20140801	18:01:21	114.279	31.9683	127	24	4.064	B	26.69
1338	3864B03DB	20140801	17:01:11	114.279	31.9681	111	23	4.066	B	15.36
1339	3864B03DB	20140801	16:01:28	114.28	31.9682	140	23	4.069	B	32.3
1340	3864B03DB	20140801	15:01:13	114.28	31.968	168	31	4.069	B	37.07
1341	3864B03DB	20140801	14:01:21	114.28	31.968	110	32.24	4.065	B	19.5
1342	3864B03DB	20140801	13:00:56	114.279	31.968	123	31.24	4.062	B	6.69
1343	3864B03DB	20140801	12:01:06	114.28	31.9679	125	27.24	4.058	B	17.44
1344	3864B03DB	20140801	11:00:58	114.28	31.968	95	31	4.058	B	9.58
1345	3864B03DB	20140801	10:01:11	114.279	31.9679	111	28.24	4.054	B	15.6
1346	3864B03DB	20140801	9:01:34	114.28	31.9681	121	28.24	4.05	C	22.21
1347	3864B03DB	20140801	8:01:28	114.28	31.9678	142	24	4.057	B	25.39
1348	3864B03DB	20140801	7:01:35	114.28	31.968	116	23	4.059	C	23.62
1349	3864B03DB	20140801	6:01:01	114.279	31.9679	138	21	4.061	B	16.13
1350	3864B03DB	20140801	5:01:12	114.28	31.9679	131	21.24	4.063	B	19.21
1351	3864B03DB	20140801	4:00:53	114.28	31.9679	128	21	4.064	B	26.13
1352	3864B03DB	20140801	3:00:51	114.28	31.968	127	21	4.066	B	12.08
1353	3864B03DB	20140801	2:00:55	114.28	31.9679	125	21	4.067	B	19.21
1354	3864B03DB	20140801	1:00:55	114.28	31.968	149	21	4.069	B	10.75
1355	3864B03DB	20140801	0:01:05	114.28	31.9679	112	21	4.07	B	15.22
1356	3864B03DB	20140731	23:00:52	114.28	31.9679	130	21	4.072	B	21.69
1357	3864B03DB	20140731	22:00:52	114.279	31.9679	126	21.24	4.073	B	21.49
1358	3864B03DB	20140731	21:01:12	114.28	31.9679	107	22.24	4.075	B	18.49
1359	3864B03DB	20140731	20:00:55	114.28	31.968	124	22.24	4.076	B	11.87
1360	3864B03DB	20140731	19:00:58	114.279	31.9679	100	25	4.078	B	25.04
1361	3864B03DB	20140731	18:02:30	114.28	31.9682	128	27.24	4.083	C	12.76
1362	3864B03DB	20140731	17:11:51	114.28	31.9681	135	30	4.083	D	48.1
1363	3864B03DB	20140731	16:01:03	114.279	31.9678	86	28.24	4.081	B	35.29
1364	3864B03DB	20140731	15:01:42	114.279	31.9679	117	30.24	4.081	C	17.19
1365	3864B03DB	20140731	14:00:54	114.28	31.9679	110	28	4.076	B	20.94
1366	3864B03DB	20140731	13:01:11	114.28	31.968	129	32.24	4.078	B	11.4
1367	3864B03DB	20140731	12:01:15	114.279	31.968	125	33.24	4.064	B	11.1
1368	3864B03DB	20140731	11:01:11	114.279	31.9678	94	30	4.061	B	35.39
1369	3864B03DB	20140731	10:00:55	114.279	31.9682	100	35	4.054	B	20.43
1370	3864B03DB	20140731	9:01:42	114.28	31.9681	95	29	4.049	C	17.56
1371	3864B03DB	20140731	8:03:12	114.28	31.9679	115	24.24	4.055	D	17.44
1372	3864B03DB	20140731	7:01:12	114.28	31.9679	147	24	4.055	B	22.05
1373	3864B03DB	20140731	6:00:55	114.28	31.9678	124	22	4.055	B	27.62
1374	3864B03DB	20140731	5:00:51	114.279	31.9679	101	22	4.057	B	27
1375	3864B03DB	20140731	4:00:48	114.28	31.968	172	22	4.058	B	15.6
1376	3864B03DB	20140731	3:00:57	114.279	31.9679	120	21.24	4.059	B	14.51
1377	3864B03DB	20140731	2:01:30	114.28	31.9678	122	22	4.061	B	29.26
1378	3864B03DB	20140731	1:00:55	114.28	31.9679	135	21.24	4.063	B	15.79
1379	3864B03DB	20140731	0:00:54	114.28	31.9679	136	22	4.064	B	26.91
1380	3864B03DB	20140730	23:00:49	114.279	31.9679	113	21.24	4.066	B	16.86
1381	3864B03DB	20140730	22:00:54	114.28	31.9679	121	21	4.067	B	16.4
1382	3864B03DB	20140730	21:00:55	114.279	31.9679	136	20.24	4.069	B	23.66
1383	3864B03DB	20140730	20:00:47	114.28	31.9679	128	21	4.07	B	20.14
1384	3864B03DB	20140730	19:00:51	114.28	31.9678	100	24	4.071	B	25.29
1385	3864B03DB	20140730	18:01:06	114.279	31.968	105	24	4.073	B	11.96
1386	3864B03DB	20140730	17:01:41	114.28	31.9681	127	28.24	4.076	C	21.38
1387	3864B03DB	20140730	16:01:13	114.28	31.968	104	35	4.078	B	12.08
1388	3864B03DB	20140730	15:01:11	114.279	31.968	91	25.24	4.075	B	8.14
1389	3864B03DB	20140730	14:00:58	114.279	31.9682	112	36	4.061	B	20.51
1390	3864B03DB	20140730	13:01:09	114.28	31.9679	139	34	4.049	B	20.17
1391	3864B03DB	20140730	12:01:06	114.28	31.968	125	34	4.04	B	15.46
1392	3864B03DB	20140730	11:01:11	114.28	31.9679	106	34.24	4.034	B	26.14
1393	3864B03DB	20140730	10:01:43	114.279	31.9679	95	29	4.031	C	20.67
1394	3864B03DB	20140730	9:02:23	114.279	31.9687	311	32	4.031	C	74.45
1395	3864B03DB	20140730	8:00:56	114.279	31.968	139	26	4.038	B	21.22
1396	3864B03DB	20140730	7:01:03	114.279	31.9681	127	24	4.038	B	9.17
1397	3864B03DB	20140730	6:01:00	114.279	31.968	129	23	4.039	B	14.66
1398	3864B03DB	20140730	5:00:54	114.28	31.968	113	23	4.041	B	11.53
1399	3864B03DB	20140730	4:00:59	114.28	31.9681	216	23	4.042	B	25.33
1400	3864B03DB	20140730	3:01:16	114.279	31.9679	103	23	4.044	B	21.09
1401	3864B03DB	20140730	2:01:12	114.28	31.9679	124	23	4.046	B	16.5
1402	3864B03DB	20140730	1:00:56	114.28	31.9679	121	23	4.048	B	15.22
1403	3864B03DB	20140730	0:01:12	114.28	31.9679	141	23.24	4.05	B	18.72
1404	3864B03DB	20140729	23:00:52	114.28	31.9679	142	23	4.051	B	23.85
1405	3864B03DB	20140729	22:00:55	114.28	31.9679	126	22.24	4.053	B	17.46
1406	3864B03DB	20140729	21:00:55	114.28	31.9679	137	23.24	4.054	B	28.79
1407	3864B03DB	20140729	20:00:52	114.28	31.9679	126	23.24	4.3	B	19.83
1408	3864B03DB	20140729	19:00:55	114.279	31.9678	66	25.24	4.058	B	35.29
1409	3864B03DB	20140729	18:01:04	114.28	31.9679	128	29.24	4.059	B	20.17
1410	3864B03DB	20140729	17:01:11	114.279	31.9679	119	32.24	4.058	B	17.79
1411	3864B03DB	20140729	16:01:16	114.28	31.9681	166	35	4.055	B	13.83
1412	3864B03DB	20140729	15:01:13	114.279	31.9681	102	31.24	4.05	B	17
1413	3864B03DB	20140729	14:00:57	114.28	31.9683	125	34	4.043	B	28.51
1414	3864B03DB	20140729	13:01:11	114.279	31.968	101	30	4.037	B	19.35
1415	3864B03DB	20140729	12:00:54	114.28	31.968	157	31.24	4.032	B	32.72
1416	3864B03DB	20140729	11:00:59	114.28	31.968	96	34	4.025	B	21.83
1417	3864B03DB	20140729	10:01:34	114.279	31.9679	113	34	4.014	C	18.89
1418	3864B03DB	20140729	8:00:58	114.28	31.9679	128	28	4.015	B	16.87
1419	3864B03DB	20140729	7:01:09	114.28	31.9679	151	25	4.013	B	19.27
1420	3864B03DB	20140729	6:02:54	114.279	31.9677	112	23	4.017	C	44.63
1421	3864B03DB	20140729	5:01:35	114.279	31.968	119	23	4.02	C	22.87
1422	3864B03DB	20140729	4:01:12	114.279	31.968	163	23	4.021	B	6.69
1423	3864B03DB	20140729	3:01:36	114.28	31.968	156	23	4.024	C	7.4
1424	3864B03DB	20140729	2:02:01	114.279	31.9681	139	23	4.027	C	22.7
1425	3864B03DB	20140729	1:01:22	114.279	31.9679	134	22.24	4.029	B	26.3
1426	3864B03DB	20140729	0:00:52	114.279	31.9682	125	22.24	4.031	B	21.45
1427	3864B03DB	20140728	23:01:03	114.279	31.9679	106	23	4.033	B	20.5
1428	3864B03DB	20140728	22:00:55	114.279	31.9681	131	23	4.034	B	16.8
1429	3864B03DB	20140728	21:00:58	114.279	31.968	137	23	4.035	B	21.89
1430	3864B03DB	20140728	20:00:55	114.279	31.9681	135	23.24	4.037	B	11.44
1431	3864B03DB	20140728	19:00:55	114.279	31.9678	56	24.24	4.038	B	44.51
1432	3864B03DB	20140728	18:01:09	114.28	31.9682	104	28.24	4.04	B	26.76
1433	3864B03DB	20140728	17:00:55	114.28	31.9679	112	29	4.04	B	25.91
1434	3864B03DB	20140728	16:01:03	114.279	31.9679	117	25.24	4.04	B	21.09
1435	3864B03DB	20140728	15:01:11	114.28	31.968	124	24.24	4.04	B	11.87
1436	3864B03DB	20140728	14:01:41	114.279	31.9682	118	35.24	4.032	C	26.2
1437	3864B03DB	20140728	13:01:02	114.28	31.968	107	32	4.019	B	18.29
1438	3864B03DB	20140728	12:01:01	114.28	31.9679	114	33	4.011	B	18.58
1439	3864B03DB	20140728	11:01:13	114.279	31.9678	100	31	4.008	B	27.6
1440	3864B03DB	20140728	10:01:11	114.28	31.9679	125	28	4.003	B	18.58
1441	3864B03DB	20140728	9:01:30	114.28	31.9679	110	27.24	4.003	B	15.22
1442	3864B03DB	20140728	8:01:12	114.279	31.968	102	26.24	4.008	B	13.43
1443	3864B03DB	20140728	7:01:30	114.28	31.9681	164	23	4.007	B	23.79
1444	3864B03DB	20140728	6:01:25	114.28	31.968	157	20	4.008	B	13.34
1445	3864B03DB	20140728	5:00:50	114.28	31.9679	127	20	4.009	B	19.83
1446	3864B03DB	20140728	4:00:46	114.279	31.9679	102	25.24	4.01	B	24.16
1447	3864B03DB	20140728	3:01:12	114.28	31.9679	134	20.24	4.011	B	21.23
1448	3864B03DB	20140728	2:01:30	114.28	31.968	145	20.24	4.014	B	9.63
1449	3864B03DB	20140728	1:01:14	114.28	31.9679	118	21	4.015	B	19.83
1450	3864B03DB	20140728	0:01:01	114.28	31.9679	139	21	4.017	B	25.91
1451	3864B03DB	20140727	23:01:15	114.28	31.9677	133	21	4.019	B	38.78
1452	3864B03DB	20140727	22:00:55	114.28	31.9679	130	21	4.02	B	20.82
1453	3864B03DB	20140727	21:01:07	114.28	31.9679	135	21	4.022	B	17.46
1454	3864B03DB	20140727	20:00:48	114.28	31.9679	122	21.24	4.023	B	19.04
1455	3864B03DB	20140727	19:01:12	114.279	31.9679	107	24	4.025	B	19.33
1456	3864B03DB	20140727	18:00:55	114.279	31.9683	117	26	4.027	B	24.37
1457	3864B03DB	20140727	17:00:55	114.28	31.9681	131	28.24	4.026	B	8.03
1458	3864B03DB	20140727	16:01:29	114.28	31.968	89	34	4.024	B	12.36
1459	3864B03DB	20140727	15:00:59	114.279	31.9682	142	30	4.019	B	11.06
1460	3864B03DB	20140727	14:00:56	114.28	31.9681	109	34	4.015	B	2.33
1461	3864B03DB	20140727	13:01:13	114.28	31.9682	114	34	4.005	B	22.12
1462	3864B03DB	20140727	12:00:56	114.28	31.968	116	30.24	3.996	B	15.1
1463	3864B03DB	20140727	11:01:25	114.279	31.9686	281	34.24	3.992	B	54.18
1464	3864B03DB	20140727	10:01:14	114.279	31.968	121	28.24	3.986	B	12
1465	3864B03DB	20140727	9:01:36	114.28	31.968	125	30.24	3.984	C	28.08
1466	3864B03DB	20140727	8:00:59	114.279	31.968	121	24.24	3.986	B	13.9
1467	3864B03DB	20140727	7:01:21	114.279	31.968	148	21.24	3.987	B	9.17
1468	3864B03DB	20140727	6:00:55	114.279	31.9679	120	25	3.988	B	20.5
1469	3864B03DB	20140727	5:01:11	114.279	31.968	131	20.24	3.989	B	16.15
1470	3864B03DB	20140727	4:00:55	114.279	31.968	131	20	3.99	B	16.15
1471	3864B03DB	20140727	3:01:19	114.279	31.968	118	20	3.992	B	13.96
1472	3864B03DB	20140727	2:01:08	114.279	31.9678	101	20	3.993	B	32.36
1473	3864B03DB	20140727	1:00:57	114.279	31.9678	76	20.24	3.995	B	45.62
1474	3864B03DB	20140727	0:01:07	114.279	31.9681	143	21	3.996	B	26.34
1475	3864B03DB	20140726	23:00:55	114.279	31.9681	116	20.24	3.997	B	14.9
1476	3864B03DB	20140726	22:00:58	114.279	31.9682	141	20.24	3.999	B	21.09
1477	3864B03DB	20140726	21:00:51	114.279	31.968	122	20.24	4	B	14.98
1478	3864B03DB	20140726	20:00:57	114.279	31.968	105	21	4.002	B	18.34
1479	3864B03DB	20140726	19:00:50	114.279	31.9681	107	22	4.003	B	18.92
1480	3864B03DB	20140726	18:01:12	114.279	31.968	121	27.24	4.004	B	15.42
1481	3864B03DB	20140726	17:01:11	114.279	31.9679	98	28	4.003	B	42.09
1482	3864B03DB	20140726	16:01:36	114.28	31.9679	114	27	4.003	C	16.34
1483	3864B03DB	20140726	15:00:56	114.279	31.968	115	28	4	B	6.45
1484	3864B03DB	20140726	14:00:56	114.28	31.968	95	35	3.991	B	12.99
1485	3864B03DB	20140726	13:00:56	114.28	31.968	105	32.24	3.979	B	20.13
1486	3864B03DB	20140726	12:01:09	114.28	31.9681	133	30	3.97	B	25.23
1487	3864B03DB	20140726	11:00:55	114.279	31.9679	111	32	3.967	B	18.64
1488	3864B03DB	20140726	10:01:11	114.279	31.9679	99	26.24	3.963	B	22.04
1489	3864B03DB	20140726	9:01:28	114.279	31.9681	126	27	3.961	B	3.87
1490	3864B03DB	20140726	8:01:13	114.28	31.9681	113	24	3.964	B	25.25
1491	3864B03DB	20140726	7:00:57	114.28	31.968	127	23	3.964	B	21.24
1492	3864B03DB	20140726	6:01:05	114.279	31.9679	131	20	3.964	B	21.99
1493	3864B03DB	20140726	5:00:54	114.28	31.9679	124	24.24	3.965	B	16.34
1494	3864B03DB	20140726	4:01:12	114.28	31.9679	123	25	3.967	B	19.7
1495	3864B03DB	20140726	3:01:02	114.28	31.968	120	25.24	3.968	B	7.73
1496	3864B03DB	20140726	2:01:12	114.28	31.9679	121	25.24	3.97	B	15.39
1497	3864B03DB	20140726	1:00:53	114.279	31.9679	125	25.24	3.971	B	21.99
1498	3864B03DB	20140726	0:00:52	114.28	31.9679	125	25.24	3.972	B	15.22
1499	3864B03DB	20140725	23:00:49	114.28	31.9679	129	20	3.972	B	19.83
1500	3864B03DB	20140725	22:00:54	114.28	31.9679	126	20	3.974	B	22.05
1501	3864B03DB	20140725	21:00:51	114.279	31.9679	117	20	3.975	B	17.79
1502	3864B03DB	20140725	20:00:48	114.279	31.9679	110	20.24	3.976	B	18.64
1503	3864B03DB	20140725	19:01:09	114.279	31.968	121	23	3.978	B	22.29
1504	3864B03DB	20140725	18:02:14	114.28	31.9681	97	26	3.981	C	30.91
1505	3864B03DB	20140725	17:01:17	114.28	31.9681	185	26	3.982	B	27.36
1506	3864B03DB	20140725	16:01:05	114.279	31.9681	128	29.24	3.979	B	9.29
1507	3864B03DB	20140725	15:01:11	114.279	31.9681	127	35	3.978	B	17.84
1508	3864B03DB	20140725	14:01:16	114.279	31.9681	120	30	3.972	B	30.26
1509	3864B03DB	20140725	13:00:56	114.28	31.968	124	34	3.964	B	23.62
1510	3864B03DB	20140725	12:11:55	114.28	31.9679	116	31.24	3.957	D	24.92
1511	3864B03DB	20140725	11:01:13	114.279	31.9679	74	27.24	3.95	B	23.77
1512	3864B03DB	20140725	10:03:19	114.28	31.9679	127	26	3.948	D	24.92
1513	3864B03DB	20140725	9:03:16	114.279	31.9682	139	25	3.951	D	9.85
1514	3864B03DB	20140725	8:00:54	114.28	31.9681	122	24.24	3.953	B	19.54
1515	3864B03DB	20140725	7:01:41	114.279	31.9678	100	22.24	3.95	C	29.55
1516	3864B03DB	20140725	6:01:12	114.279	31.968	95	21	3.952	B	20.54
1517	3864B03DB	20140725	5:01:39	114.279	31.968	122	21	3.954	C	22.87
1518	3864B03DB	20140725	4:00:51	114.279	31.968	139	20	3.955	B	9.74
1519	3864B03DB	20140725	3:00:51	114.279	31.9681	103	21.24	3.955	B	24.42
1520	3864B03DB	20140725	2:01:28	114.28	31.9681	124	21.24	3.957	B	2.77
1521	3864B03DB	20140725	1:01:08	114.279	31.9681	134	20.24	3.959	B	12.98
1522	3864B03DB	20140725	0:00:53	114.279	31.9679	122	21	3.96	B	25.61
1523	3864B03DB	20140724	23:01:03	114.279	31.9681	148	21.24	3.961	B	13.25
1524	3864B03DB	20140724	22:01:13	114.279	31.968	130	22	3.963	B	15.42
1525	3864B03DB	20140724	21:01:08	114.279	31.9682	116	22	3.964	B	14.87
1526	3864B03DB	20140724	20:01:12	114.279	31.968	107	23	3.966	B	27.06
1527	3864B03DB	20140724	19:01:01	114.279	31.9679	99	24	3.967	B	19.16
1528	3864B03DB	20140724	18:01:19	114.28	31.9677	161	25.24	3.969	B	52.49
1529	3864B03DB	20140724	17:01:03	114.28	31.9682	148	26.24	3.97	B	25.1
1530	3864B03DB	20140724	16:01:11	114.28	31.968	116	28	3.97	B	12.99
1531	3864B03DB	20140724	15:00:54	114.28	31.9681	107	30.24	3.968	B	17.62
1532	3864B03DB	20140724	14:02:44	114.28	31.9681	112	30.24	3.959	C	11.96
1533	3864B03DB	20140724	13:01:13	114.279	31.968	116	35.24	3.952	B	9.74
1534	3864B03DB	20140724	12:01:04	114.279	31.9683	59	34.24	3.945	B	21.76
1535	3864B03DB	20140724	11:01:05	114.279	31.9679	131	25.24	3.939	B	15.6
1536	3864B03DB	20140724	10:01:00	114.279	31.968	88	24.24	3.938	B	13.96
1537	3864B03DB	20140724	8:01:11	114.28	31.9679	130	24	3.938	B	14.28
1538	3864B03DB	20140724	7:01:02	114.28	31.9679	126	22	3.939	B	21.69
1539	3864B03DB	20140724	6:00:57	114.279	31.9679	110	21.24	3.939	B	20.67
1540	3864B03DB	20140724	5:01:12	114.28	31.9679	143	22	3.941	B	17.2
1541	3864B03DB	20140724	4:00:55	114.28	31.9679	143	22	3.942	B	19.83
1542	3864B03DB	20140724	3:00:55	114.28	31.9679	118	21.24	3.943	B	14.1
1543	3864B03DB	20140724	2:01:30	114.28	31.9678	110	22	3.945	B	25.39
1544	3864B03DB	20140724	1:00:55	114.28	31.9679	125	22	3.946	B	21.94
1545	3864B03DB	20140724	0:00:56	114.28	31.9679	117	22	3.947	B	15.22
1546	3864B03DB	20140723	23:00:55	114.28	31.9679	135	21.24	3.948	B	16.87
1547	3864B03DB	20140723	22:01:10	114.28	31.968	134	22.24	3.95	B	12.58
1548	3864B03DB	20140723	21:00:55	114.28	31.968	125	22.24	3.951	B	8.81
1549	3864B03DB	20140723	20:00:54	114.279	31.968	108	22.24	3.952	B	11.96
1550	3864B03DB	20140723	19:01:06	114.28	31.968	121	24	3.953	B	15.46
1551	3864B03DB	20140723	18:01:07	114.28	31.9681	98	26.24	3.955	B	13.28
1552	3864B03DB	20140723	17:01:41	114.28	31.9677	102	25	3.957	C	45.32
1553	3864B03DB	20140723	16:00:58	114.28	31.9682	168	29	3.957	B	40.48
1554	3864B03DB	20140723	15:00:56	114.279	31.9686	126	28.24	3.953	B	62.07
1555	3864B03DB	20140723	14:00:58	114.279	31.968	8	30.24	3.951	B	25.86
1556	3864B03DB	20140723	13:00:55	114.28	31.9684	96	30	3.947	B	40.17
1557	3864B03DB	20140723	12:01:01	114.28	31.968	181	27	3.944	B	9.89
1558	3864B03DB	20140723	11:00:51	114.28	31.9681	81	26	3.94	B	20.07
1559	3864B03DB	20140723	10:00:55	114.28	31.968	114	24	3.939	B	8.97
1560	3864B03DB	20140723	9:01:09	114.28	31.968	118	25	3.939	B	7.73
1561	3864B03DB	20140723	8:01:03	114.28	31.9679	142	24	3.946	B	17.61
1562	3864B03DB	20140723	7:00:49	114.279	31.968	128	21.24	3.946	B	21.56
1563	3864B03DB	20140723	6:00:53	114.28	31.9679	124	22.24	3.947	B	17.95
1564	3864B03DB	20140723	5:00:56	114.28	31.968	139	22	3.948	B	12.37
1565	3864B03DB	20140723	4:00:55	114.28	31.968	128	22.24	3.95	B	16.47
1566	3864B03DB	20140723	3:00:55	114.28	31.9679	146	22	3.95	B	26.13
1567	3864B03DB	20140723	2:01:01	114.28	31.9679	139	22.24	3.952	B	25.41
1568	3864B03DB	20140723	1:00:56	114.28	31.9679	130	22.24	3.953	B	19.27
1569	3864B03DB	20140723	0:00:53	114.28	31.9679	127	22	3.954	B	20.62
1570	3864B03DB	20140722	23:00:55	114.28	31.9679	127	22	3.955	B	20.14
1571	3864B03DB	20140722	22:00:55	114.28	31.9679	133	23	3.956	B	23.05
1572	3864B03DB	20140722	21:00:55	114.28	31.9679	116	23	3.957	B	15.22
1573	3864B03DB	20140722	20:00:55	114.28	31.9679	122	23	3.958	B	19.55
1574	3864B03DB	20140722	19:01:02	114.279	31.9678	118	25.24	3.959	B	30.92
1575	3864B03DB	20140722	18:01:09	114.279	31.9678	169	28.24	3.96	B	25.34
1576	3864B03DB	20140722	17:01:01	114.28	31.9682	132	33	3.959	B	18.25
1577	3864B03DB	20140722	16:00:57	114.28	31.9681	97	31	3.955	B	6.67
1578	3864B03DB	20140722	15:01:36	114.28	31.9682	114	31	3.948	C	8.59
1579	3864B03DB	20140722	14:01:47	114.28	31.968	164	33	3.942	C	16.75
1580	3864B03DB	20140722	13:00:55	114.28	31.968	155	36	3.934	B	38.86
1581	3864B03DB	20140722	12:00:54	114.279	31.9679	106	31.24	3.929	B	19.71
1582	3864B03DB	20140722	11:00:54	114.28	31.968	134	33.24	3.922	B	27.38
1583	3864B03DB	20140722	10:01:04	114.279	31.9678	176	32	3.916	B	35.15
1584	3864B03DB	20140722	9:01:15	114.28	31.9679	115	28.24	3.911	B	15.39
1585	3864B03DB	20140722	8:01:07	114.28	31.968	139	27.24	3.915	B	36.85
1586	3864B03DB	20140722	7:00:59	114.28	31.9679	134	24.24	3.914	B	24.17
1587	3864B03DB	20140722	6:01:07	114.28	31.968	113	22	3.916	B	26.12
1588	3864B03DB	20140722	5:01:13	114.279	31.9681	119	22.24	3.917	B	20.61
1589	3864B03DB	20140722	4:00:57	114.279	31.9678	98	22	3.918	B	43.16
1590	3864B03DB	20140722	3:01:42	114.279	31.968	149	22.24	3.92	C	19.13
1591	3864B03DB	20140722	2:01:32	114.279	31.9679	110	22	3.922	C	32.22
1592	3864B03DB	20140722	1:01:14	114.279	31.968	120	22	3.923	B	22.14
1593	3864B03DB	20140722	0:01:01	114.279	31.968	122	22	3.924	B	15.42
1594	3864B03DB	20140721	23:01:00	114.278	31.9678	45	23	3.925	B	110.24
1595	3864B03DB	20140721	22:01:56	114.28	31.9682	144	23	3.928	C	15.06
1596	3864B03DB	20140721	21:01:16	114.279	31.9681	108	23	3.929	B	20.66
1597	3864B03DB	20140721	20:00:55	114.279	31.968	120	23.24	3.931	B	12.2
1598	3864B03DB	20140721	19:01:25	114.28	31.9677	101	25.24	3.932	B	46.13
1599	3864B03DB	20140721	18:01:14	114.28	31.9679	128	29	3.933	B	16.87
1600	3864B03DB	20140721	17:00:57	114.279	31.968	127	32.24	3.931	B	13.01
1601	3864B03DB	20140721	16:01:21	114.28	31.9681	125	31.24	3.929	B	14.25
1602	3864B03DB	20140721	15:00:54	114.28	31.9681	103	35	3.921	B	8.16
1603	3864B03DB	20140721	14:02:06	114.279	31.9681	115	36.24	3.914	C	7.42
1604	3864B03DB	20140721	13:00:55	114.279	31.9678	161	35.24	3.91	B	26.31
1605	3864B03DB	20140721	12:01:00	114.28	31.968	110	31.24	3.903	B	12.5
1606	3864B03DB	20140721	11:01:08	114.279	31.9681	87	30.24	3.897	B	11.07
1607	3864B03DB	20140721	10:00:55	114.28	31.9681	112	35	3.892	B	23.46
1608	3864B03DB	20140721	9:01:08	114.28	31.968	137	26.24	3.884	B	7.73
1609	3864B03DB	20140721	8:00:58	114.28	31.9679	140	25.24	3.889	B	16.87
1610	3864B03DB	20140721	7:01:15	114.279	31.9679	139	25	3.891	B	18.26
1611	3864B03DB	20140721	6:00:55	114.279	31.968	109	21	3.892	B	17.14
1612	3864B03DB	20140721	5:00:56	114.279	31.968	119	22	3.893	B	24.06
1613	3864B03DB	20140721	4:01:00	114.279	31.9681	133	22.24	3.895	B	11.44
1614	3864B03DB	20140721	3:00:53	114.279	31.968	128	22.24	3.897	B	20.54
1615	3864B03DB	20140721	2:01:09	114.279	31.968	118	22	3.9	B	18.34
1616	3864B03DB	20140721	1:01:29	114.279	31.9683	132	21	3.903	B	23.44
1617	3864B03DB	20140721	0:01:01	114.279	31.968	125	21.24	3.905	B	14.93
1618	3864B03DB	20140720	23:01:04	114.277	31.9679	9	22	3.906	B	228.99
1619	3864B03DB	20140720	22:01:19	114.279	31.9681	130	23	3.909	B	7.32
1620	3864B03DB	20140720	21:00:57	114.279	31.9681	118	22.24	3.91	B	18.76
1621	3864B03DB	20140720	20:00:58	114.279	31.9681	127	22.24	3.912	B	13.1
1622	3864B03DB	20140720	19:00:55	114.279	31.968	129	23	3.913	B	10
1623	3864B03DB	20140720	18:11:50	114.28	31.9679	141	27.24	3.913	D	24.4
1624	3864B03DB	20140720	17:01:00	114.274	31.9658	0	27.24	3.913	B	624.74
1625	3864B03DB	20140720	16:01:43	114.28	31.968	67	28	3.913	C	7.31
1626	3864B03DB	20140720	15:00:54	114.279	31.9679	106	28	3.912	B	16.41
1627	3864B03DB	20140720	14:11:54	114.28	31.968	130	33	3.905	D	29.28
1628	3864B03DB	20140720	13:00:56	114.279	31.9678	84	30.24	3.901	B	45.25
1629	3864B03DB	20140720	12:00:56	114.279	31.9681	103	35	3.889	B	12.61
1630	3864B03DB	20140720	11:01:05	114.28	31.9679	116	29.24	3.878	B	14.71
1631	3864B03DB	20140720	10:01:17	114.28	31.968	111	30	3.876	B	13.64
1632	3864B03DB	20140720	9:01:14	114.28	31.968	132	26.24	3.873	B	13.34
1633	3864B03DB	20140720	8:01:00	114.28	31.968	122	28	3.877	B	18.01
1634	3864B03DB	20140720	7:00:51	114.279	31.9679	121	23	3.872	B	22.04
1635	3864B03DB	20140720	6:00:50	114.28	31.9679	135	21.24	3.872	B	21.69
1636	3864B03DB	20140720	5:00:51	114.28	31.9679	129	20.24	3.873	B	19.04
1637	3864B03DB	20140720	4:00:55	114.28	31.968	123	20.24	3.874	B	15.98
1638	3864B03DB	20140720	3:00:55	114.28	31.9679	126	20	3.875	B	21.09
1639	3864B03DB	20140720	2:00:55	114.28	31.9679	125	20.24	3.876	B	15.36
1640	3864B03DB	20140720	1:01:12	114.28	31.9678	113	21	3.878	B	25.39
1641	3864B03DB	20140720	0:00:53	114.28	31.9679	112	21.25	3.882	B	17.8
1642	3864B03DB	20140719	23:00:53	114.28	31.9679	128	21.25	3.886	B	14.47
1643	3864B03DB	20140719	22:01:18	114.279	31.9678	125	21.25	3.893	B	28.24
1644	3864B03DB	20140719	21:00:55	114.28	31.968	116	21.25	3.897	B	9.72
1645	3864B03DB	20140719	20:00:53	114.279	31.968	114	22	3.901	B	8.86
1646	3864B03DB	20140719	19:01:04	114.28	31.9679	124	23.25	3.906	B	18.62
1647	3864B03DB	20140719	18:01:01	114.28	31.9684	83	25.25	3.911	B	34.02
1648	3864B03DB	20140719	17:11:51	114.28	31.968	126	29	3.913	D	5.16
1649	3864B03DB	20140719	16:00:56	114.28	31.9679	109	26.24	3.917	B	25.46
1650	3864B03DB	20140719	15:00:56	114.28	31.9679	109	28.25	3.919	B	16.07
1651	3864B03DB	20140719	14:00:55	114.28	31.9681	135	31.24	3.918	B	7.17
1652	3864B03DB	20140719	13:00:55	114.279	31.9679	132	28.25	3.914	B	18.89
1653	3864B03DB	20140719	12:00:59	114.28	31.9678	116	32.25	3.911	B	36.26
1654	3864B03DB	20140719	11:00:55	114.28	31.9679	137	30.24	3.921	B	19.04
1655	3864B03DB	20140719	10:01:15	114.28	31.9681	172	26	3.921	B	11.2
1656	3864B03DB	20140719	9:00:54	114.28	31.9683	114	28.25	3.92	B	50.16
1657	3864B03DB	20140719	8:00:48	114.28	31.9681	157	25	3.928	B	25.33
1658	3864B03DB	20140719	7:01:09	114.28	31.9679	135	22	3.93	B	18.49
1659	3864B03DB	20140719	6:00:57	114.28	31.9679	122	20.25	3.933	B	17.75
1660	3864B03DB	20140719	5:00:51	114.279	31.968	139	25	3.937	B	13.96
1661	3864B03DB	20140719	4:00:55	114.28	31.968	137	25.25	3.939	B	12.58
1662	3864B03DB	20140719	3:00:59	114.28	31.9679	123	20.25	3.942	B	17.95
1663	3864B03DB	20140719	2:00:58	114.28	31.9679	124	20.25	3.945	B	15.23
1664	3864B03DB	20140719	1:00:53	114.28	31.9678	123	20.25	3.948	B	25.5
1665	3864B03DB	20140719	0:00:54	114.28	31.9679	124	21	3.951	B	16.87
1666	3864B03DB	20140718	23:00:54	114.28	31.968	118	20.25	3.955	B	11.94
1667	3864B03DB	20140718	22:00:47	114.28	31.9679	134	20.25	3.959	B	17.51
1668	3864B03DB	20140718	21:00:38	114.28	31.9679	116	20.25	3.962	A	14.28
1669	3864B03DB	20140718	20:00:33	114.279	31.9679	119	20	3.966	A	22.04
1670	3864B03DB	20140718	19:00:36	114.28	31.9679	89	22.25	3.97	A	28.09
1671	3864B03DB	20140718	18:00:59	114.28	31.968	155	31	3.974	B	50.44
1672	3864B03DB	20140718	16:01:20	114.28	31.968	120	26.25	3.965	B	4.05
1673	3864B03DB	20140718	15:00:35	114.279	31.9684	137	26.25	3.964	A	32.08
1674	3864B03DB	20140718	14:00:45	114.28	31.9681	113	25.25	3.963	A	3.7
1675	3864B03DB	20140718	13:00:35	114.28	31.9683	160	33.24	3.964	A	53.08
1676	3864B03DB	20140718	12:00:34	114.28	31.9679	106	27	3.956	A	29.06
1677	3864B03DB	20140718	11:01:19	114.28	31.9677	151	29.25	3.956	B	38.65
1678	3864B03DB	20140718	10:01:05	114.28	31.968	145	24.25	3.954	B	13.05
1679	3864B03DB	20140718	9:00:42	114.28	31.9677	103	26.25	3.953	A	80.06
1680	3864B03DB	20140718	8:00:25	114.28	31.9679	135	21.24	3.958	A	26.13
1681	3864B03DB	20140718	7:01:06	114.28	31.9677	190	24	3.957	B	39.97
1682	3864B03DB	20140718	6:00:30	114.28	31.9682	75	24.24	3.957	A	23.82
1683	3864B03DB	20140718	5:00:29	114.28	31.9683	196	24	3.957	A	28
1684	3864B03DB	20140718	4:00:29	114.28	31.9681	158	24	3.958	A	6.47
1685	3864B03DB	20140718	3:00:49	114.279	31.9681	124	24	3.959	B	19.33
1686	3864B03DB	20140718	2:00:34	114.28	31.9683	125	24	3.959	A	24.06
1687	3864B03DB	20140718	1:00:28	114.28	31.9683	121	24	3.96	A	28.42
1688	3864B03DB	20140718	0:00:32	114.279	31.9681	138	23.24	3.96	A	9.18
1689	3864B04A0	20140811	23:00:35	114.28	31.9678	121	25.24	3.821	A	26.74
1690	3864B04A0	20140811	22:00:52	114.28	31.9679	125	25.24	3.822	B	20.14
1691	3864B04A0	20140811	21:00:37	114.28	31.9679	139	20	3.822	A	27.69
1692	3864B04A0	20140811	20:00:38	114.28	31.968	138	20.24	3.822	A	9.89
1693	3864B04A0	20140811	19:00:52	114.28	31.9679	114	25.24	3.823	B	21.23
1694	3864B04A0	20140811	18:01:01	114.279	31.9678	91	25.24	3.824	B	31.29
1695	3864B04A0	20140811	17:01:14	114.279	31.9682	123	25.24	3.824	B	13.12
1696	3864B04A0	20140811	16:01:10	114.28	31.9678	115	24	3.825	B	26.02
1697	3864B04A0	20140811	15:13:16	114.279	31.9679	96	24	3.827	D	17.92
1698	3864B04A0	20140811	14:00:54	114.28	31.9679	120	24	3.829	B	20.08
1699	3864B04A0	20140811	13:01:52	114.279	31.9681	113	22	3.83	C	36.57
1700	3864B04A0	20140811	12:00:52	114.28	31.9681	153	21.24	3.83	B	1.83
1701	3864B04A0	20140811	11:00:35	114.28	31.9677	154	24	3.83	A	50.05
1702	3864B04A0	20140811	10:01:29	114.28	31.9677	74	23	3.83	B	46.74
1703	3864B04A0	20140811	9:00:52	114.28	31.9679	117	23.24	3.83	B	20.08
1704	3864B04A0	20140811	8:01:22	114.28	31.968	97	24	3.834	B	11.18
1705	3864B04A0	20140811	7:00:44	114.28	31.9679	106	22.24	3.834	A	17.61
1706	3864B04A0	20140811	6:00:47	114.279	31.9679	115	24.24	3.835	B	28.2
1707	3864B04A0	20140811	5:00:32	114.279	31.968	152	25.24	3.835	A	26.68
1708	3864B04A0	20140811	4:00:39	114.279	31.9679	121	21	3.836	A	23.42
1709	3864B04A0	20140811	3:00:36	114.279	31.968	122	25.24	3.836	A	13.58
1710	3864B04A0	20140811	2:00:32	114.279	31.968	126	21	3.836	A	29.19
1711	3864B04A0	20140811	1:00:34	114.279	31.9681	140	21	3.837	A	14.96
1712	3864B04A0	20140811	0:00:52	114.279	31.968	122	20	3.838	B	25.51
1713	3864B04A0	20140810	23:01:07	114.279	31.9682	70	20.24	3.838	B	20.45
1714	3864B04A0	20140810	22:00:42	114.279	31.9681	111	20	3.839	A	17.04
1715	3864B04A0	20140810	21:00:43	114.279	31.9679	134	20.24	3.839	A	24.83
1716	3864B04A0	20140810	20:00:39	114.279	31.9679	144	21	3.84	A	37.62
1717	3864B04A0	20140810	19:00:36	114.279	31.968	117	22	3.84	A	20.56
1718	3864B04A0	20140810	18:00:52	114.279	31.9679	95	23.24	3.841	B	31.37
1719	3864B04A0	20140810	17:01:23	114.28	31.9679	127	25	3.841	B	20.08
1720	3864B04A0	20140810	16:00:42	114.279	31.9679	97	24.24	3.842	A	25.85
1721	3864B04A0	20140810	15:00:52	114.279	31.9679	97	26	3.843	B	25.85
1722	3864B04A0	20140810	14:02:48	114.279	31.9677	120	26	3.845	C	43.5
1723	3864B04A0	20140810	13:01:16	114.28	31.9678	61	24.24	3.845	B	35.88
1724	3864B04A0	20140810	12:00:35	114.279	31.9678	122	24	3.846	A	29.01
1725	3864B04A0	20140810	11:05:13	114.28	31.9679	162	26	3.85	D	24.93
1726	3864B04A0	20140810	10:00:36	114.28	31.9678	78	23	3.85	A	27.6
1727	3864B04A0	20140810	8:01:53	114.28	31.968	126	20	3.856	C	12.08
1728	3864B04A0	20140810	7:04:50	114.279	31.9679	151	25.24	3.863	D	18.89
1729	3864B04A0	20140810	6:02:01	114.28	31.9682	180	23.24	3.866	C	26.02
1730	3864B04A0	20140810	5:00:51	114.279	31.9681	118	20	3.867	B	18.92
1731	3864B04A0	20140810	4:00:31	114.279	31.9681	106	20	3.868	A	2.35
1732	3864B04A0	20140810	3:00:43	114.279	31.968	121	25	3.869	A	12.72
1733	3864B04A0	20140810	2:00:41	114.279	31.9682	25	24	3.87	A	84.09
1734	3864B04A0	20140810	1:00:38	114.279	31.9681	139	23.24	3.871	A	9.29
1735	3864B04A0	20140810	0:00:52	114.279	31.9681	121	25.24	3.873	B	13.07
1736	3864B04A0	20140809	23:00:46	114.28	31.9678	201	20	3.874	B	31.71
1737	3864B04A0	20140809	22:00:43	114.28	31.9681	179	25	3.876	A	32.82
1738	3864B04A0	20140809	21:00:52	114.28	31.968	198	20	3.877	B	36.03
1739	3864B04A0	20140809	20:00:57	114.279	31.9678	79	25.24	3.879	B	62.49
1740	3864B04A0	20140809	19:01:50	114.279	31.968	65	20	3.884	C	21.03
1741	3864B04A0	20140809	18:00:36	114.28	31.9678	104	25	3.885	A	25.64
1742	3864B04A0	20140809	17:00:43	114.279	31.968	124	20.24	3.886	A	15.42
1743	3864B04A0	20140809	16:01:41	114.279	31.9681	110	20.24	3.89	C	24.57
1744	3864B04A0	20140809	15:01:24	114.279	31.9679	108	21.24	3.892	B	16.13
1745	3864B04A0	20140809	14:01:47	114.279	31.968	102	20	3.896	C	11.28
1746	3864B04A0	20140809	13:00:59	114.279	31.9681	109	20	3.898	B	12.98
1747	3864B04A0	20140809	12:00:54	114.28	31.9678	113	20.24	3.899	B	26.74
1748	3864B04A0	20140809	11:00:34	114.279	31.9679	135	21	3.898	A	20
1749	3864B04A0	20140809	10:00:48	114.279	31.9679	93	20.24	3.899	B	24.83
1750	3864B04A0	20140809	9:01:17	114.279	31.968	130	21.24	3.898	B	18.82
1751	3864B04A0	20140809	8:01:22	114.279	31.9681	109	21	3.906	B	20.61
1752	3864B04A0	20140809	7:00:57	114.279	31.9681	128	20.24	3.908	B	14.9
1753	3864B04A0	20140809	6:00:54	114.279	31.9679	97	25.24	3.909	B	39.89
1754	3864B04A0	20140809	5:00:51	114.28	31.9681	141	20.24	3.91	B	4.22
1755	3864B04A0	20140809	4:00:51	114.28	31.968	141	20.24	3.91	B	10.47
1756	3864B04A0	20140809	3:00:41	114.279	31.9679	118	20.24	3.911	A	23.31
1757	3864B04A0	20140809	2:00:52	114.28	31.9679	117	20.24	3.912	B	15.22
1758	3864B04A0	20140809	1:00:52	114.279	31.9679	120	20.24	3.913	B	18.89
1759	3864B04A0	20140809	0:01:56	114.281	31.9679	228	22	3.915	C	96.14
1760	3864B04A0	20140808	23:00:48	114.279	31.9681	96	21.24	3.916	B	3.46
1761	3864B04A0	20140808	22:00:52	114.28	31.9679	127	22	3.916	B	19.21
1762	3864B04A0	20140808	21:00:36	114.28	31.9679	133	21.24	3.917	A	26.04
1763	3864B04A0	20140808	20:00:53	114.28	31.9678	206	22	3.918	B	39.38
1764	3864B04A0	20140808	19:00:32	114.279	31.9678	108	22.24	3.919	A	28.63
1765	3864B04A0	20140808	18:00:35	114.279	31.968	155	23	3.919	A	9.74
1766	3864B04A0	20140808	17:01:21	114.28	31.9678	113	23.24	3.921	B	29.26
1767	3864B04A0	20140808	16:00:34	114.279	31.9677	96	25	3.922	A	41.9
1768	3864B04A0	20140808	15:00:47	114.28	31.9679	109	25	3.922	B	22.77
1769	3864B04A0	20140808	14:01:11	114.28	31.9678	149	24.24	3.923	B	31.77
1770	3864B04A0	20140808	13:00:53	114.28	31.968	142	24	3.924	B	8.75
1771	3864B04A0	20140808	12:00:46	114.28	31.9678	117	26	3.923	B	27.92
1772	3864B04A0	20140808	11:01:17	114.276	31.9695	0	23.24	3.924	B	373.35
1773	3864B04A0	20140808	10:00:52	114.28	31.9679	97	23	3.922	B	14.1
1774	3864B04A0	20140808	9:00:52	114.28	31.9679	128	24	3.921	B	16.5
1775	3864B04A0	20140808	8:01:22	114.279	31.9679	127	22	3.927	B	17.87
1776	3864B04A0	20140808	7:00:54	114.28	31.968	165	21	3.929	B	13.39
1777	3864B04A0	20140808	6:00:54	114.28	31.9679	133	24.24	3.93	B	18.4
1778	3864B04A0	20140808	5:00:35	114.279	31.968	122	20.24	3.931	A	12.96
1779	3864B04A0	20140808	4:00:26	114.28	31.9679	130	20	3.931	A	21.34
1780	3864B04A0	20140808	3:00:34	114.28	31.9679	111	20	3.931	A	17.61
1781	3864B04A0	20140808	2:00:52	114.28	31.9679	124	20.24	3.932	B	20.62
1782	3864B04A0	20140808	1:00:53	114.28	31.968	120	24.24	3.933	B	12.08
1783	3864B04A0	20140808	0:00:53	114.28	31.9679	121	24	3.935	B	16.22
1784	3864B04A0	20140807	23:00:35	114.28	31.9679	110	23	3.935	A	20.62
1785	3864B04A0	20140807	22:00:29	114.28	31.9679	125	24	3.935	A	22.3
1786	3864B04A0	20140807	21:00:43	114.28	31.968	124	20	3.936	A	15.25
1787	3864B04A0	20140807	20:00:40	114.28	31.9676	125	24	3.937	A	49.91
1788	3864B04A0	20140807	19:00:39	114.28	31.9679	99	24	3.937	A	18.58
1789	3864B04A0	20140807	18:00:51	114.28	31.9678	110	20.24	3.938	B	30.99
1790	3864B04A0	20140807	17:01:11	114.28	31.9678	155	21	3.939	B	46.5
1791	3864B04A0	20140807	16:00:41	114.279	31.9679	112	20	3.94	A	22.94
1792	3864B04A0	20140807	15:02:00	114.279	31.9682	108	23.24	3.942	C	20.43
1793	3864B04A0	20140807	14:02:10	114.28	31.9678	246	21.24	3.945	C	55.55
1794	3864B04A0	20140807	13:01:54	114.28	31.9678	122	22	3.947	C	33.63
1795	3864B04A0	20140807	12:01:51	114.28	31.9678	122	25.24	3.949	C	28.67
1796	3864B04A0	20140807	11:01:16	114.279	31.968	162	22	3.95	B	15.51
1797	3864B04A0	20140807	10:01:16	114.28	31.9679	122	21.24	3.951	B	26.91
1798	3864B04A0	20140807	9:04:27	114.279	31.968	124	21	3.956	D	14.66
1799	3864B04A0	20140807	8:01:09	114.279	31.9682	136	24	3.962	B	16.48
1800	3864B04A0	20140807	7:00:51	114.279	31.9681	184	21.24	3.963	B	5.57
1801	3864B04A0	20140807	6:00:53	114.279	31.9679	111	22.24	3.964	B	19.71
1802	3864B04A0	20140807	5:00:35	114.279	31.9682	109	23	3.965	A	46.15
1803	3864B04A0	20140807	4:00:36	114.279	31.9681	87	22.24	3.966	A	17.04
1804	3864B04A0	20140807	3:00:42	114.279	31.9679	142	22	3.966	A	16.86
1805	3864B04A0	20140807	2:00:36	114.279	31.9679	146	24	3.967	A	21.99
1806	3864B04A0	20140807	1:00:34	114.279	31.9681	123	24.24	3.968	A	5.13
1807	3864B04A0	20140807	0:00:52	114.279	31.968	123	24.24	3.969	B	13.01
1808	3864B04A0	20140806	23:00:37	114.279	31.9679	120	21	3.969	A	18.82
1809	3864B04A0	20140806	22:00:52	114.28	31.9679	127	22	3.97	B	21.23
1810	3864B04A0	20140806	21:00:52	114.28	31.968	151	23	3.971	B	10.71
1811	3864B04A0	20140806	20:01:12	114.279	31.9681	139	23	3.973	B	6.56
1812	3864B04A0	20140806	19:01:16	114.28	31.9679	123	22.24	3.974	B	18.49
1813	3864B04A0	20140806	18:00:39	114.279	31.9681	108	22.24	3.975	A	28.24
1814	3864B04A0	20140806	17:00:32	114.28	31.968	139	22.24	3.976	A	10.75
1815	3864B04A0	20140806	16:00:43	114.279	31.9679	113	22.24	3.977	A	20.86
1816	3864B04A0	20140806	15:00:45	114.279	31.968	111	25	3.977	A	13.43
1817	3864B04A0	20140806	14:00:45	114.279	31.9681	113	24	3.978	A	14.96
1818	3864B04A0	20140806	13:01:21	114.279	31.9683	137	23.24	3.98	B	20.87
1819	3864B04A0	20140806	12:00:52	114.28	31.9679	127	24.24	3.981	B	23.85
1820	3864B04A0	20140806	11:01:10	114.279	31.9681	114	26	3.982	B	16.06
1821	3864B04A0	20140806	10:00:42	114.279	31.968	94	25	3.982	A	7.15
1822	3864B04A0	20140806	9:02:39	114.279	31.9678	82	24.24	3.985	C	26.9
1823	3864B04A0	20140806	8:02:52	114.28	31.9681	144	24.24	3.993	C	19.54
1824	3864B04A0	20140806	7:00:56	114.28	31.9677	167	22.24	3.994	B	43.84
1825	3864B04A0	20140806	6:01:43	114.279	31.968	158	23	3.996	C	14.04
1826	3864B04A0	20140806	5:00:41	114.279	31.9681	163	23	3.997	A	20.02
1827	3864B04A0	20140806	4:00:49	114.279	31.9681	126	23	3.998	B	20.81
1828	3864B04A0	20140806	3:01:04	114.279	31.9681	102	22.24	3.999	B	19.33
1829	3864B04A0	20140806	2:00:52	114.279	31.9681	128	23	4.001	B	20.81
1830	3864B04A0	20140806	1:01:00	114.279	31.968	90	23	4.3	B	28.52
1831	3864B04A0	20140806	0:00:52	114.279	31.9679	51	23.24	4.003	B	21.92
1832	3864B04A0	20140805	23:00:52	114.279	31.968	125	22.24	4.004	B	22.76
1833	3864B04A0	20140805	22:00:50	114.279	31.968	134	23	4.005	B	7.42
1834	3864B04A0	20140805	21:00:54	114.279	31.9681	112	23	4.007	B	28.24
1835	3864B04A0	20140805	20:00:52	114.279	31.968	112	23	4.008	B	17.14
1836	3864B04A0	20140805	19:00:27	114.28	31.9679	116	23.24	4.008	A	18.49
1837	3864B04A0	20140805	18:00:51	114.279	31.968	112	24.24	4.01	B	12.35
1838	3864B04A0	20140805	17:01:47	114.28	31.968	117	26.24	4.012	C	29.92
1839	3864B04A0	20140805	16:00:51	114.28	31.968	116	25	4.014	B	11.87
1840	3864B04A0	20140805	15:01:10	114.279	31.9682	90	26.24	4.014	B	22.51
1841	3864B04A0	20140805	14:00:41	114.28	31.9679	100	24	4.014	A	24.29
1842	3864B04A0	20140805	13:00:40	114.28	31.968	137	22	4.014	A	11.4
1843	3864B04A0	20140805	12:00:58	114.279	31.968	120	20	4.014	B	18.35
1844	3864B04A0	20140805	11:00:38	114.28	31.9677	129	28.24	4.015	A	42.28
1845	3864B04A0	20140805	10:00:58	114.279	31.968	124	30	4.014	B	19.75
1846	3864B04A0	20140805	8:01:28	114.28	31.968	119	27.24	4.018	B	27.81
1847	3864B04A0	20140805	7:00:42	114.279	31.968	118	24.24	4.019	A	17.92
1848	3864B04A0	20140805	6:01:09	114.279	31.9679	131	22	4.021	B	20.87
1849	3864B04A0	20140805	5:00:35	114.28	31.9679	124	22	4.021	A	22.05
1850	3864B04A0	20140805	4:00:51	114.28	31.9679	147	22.24	4.023	B	21.09
1851	3864B04A0	20140805	3:00:32	114.28	31.9679	145	22	4.024	A	15.36
1852	3864B04A0	20140805	2:00:52	114.279	31.9679	133	22	4.025	B	17.19
1853	3864B04A0	20140805	1:00:36	114.279	31.9679	127	23	4.026	A	21.49
1854	3864B04A0	20140805	0:00:52	114.28	31.9679	142	23	4.027	B	14.71
1855	3864B04A0	20140804	23:00:29	114.28	31.9679	135	23	4.028	A	18.72
1856	3864B04A0	20140804	22:00:31	114.279	31.9678	86	23	4.029	A	30.92
1857	3864B04A0	20140804	21:01:22	114.28	31.9679	145	24	4.031	B	17.61
1858	3864B04A0	20140804	20:00:36	114.279	31.968	129	23	4.032	A	13.43
1859	3864B04A0	20140804	19:00:41	114.28	31.9679	131	24	4.033	A	14.1
1860	3864B04A0	20140804	18:00:37	114.28	31.9681	107	26.24	4.034	A	23.34
1861	3864B04A0	20140804	17:00:54	114.279	31.968	137	30.24	4.036	B	9.58
1862	3864B04A0	20140804	16:03:22	114.278	31.9667	0	32.24	4.041	D	221.6
1863	3864B04A0	20140804	15:00:49	114.279	31.968	133	37.24	4.04	B	16.15
1864	3864B04A0	20140804	14:01:24	114.28	31.9681	90	35.24	4.029	B	1.61
1865	3864B04A0	20140804	13:00:33	114.28	31.968	137	30.24	4.022	A	8.81
1866	3864B04A0	20140804	12:00:52	114.279	31.9678	127	31	4.021	B	36.62
1867	3864B04A0	20140804	11:01:47	114.279	31.968	97	34	4.013	C	13.58
1868	3864B04A0	20140804	10:00:42	114.28	31.968	101	34.24	4.007	A	11.18
1869	3864B04A0	20140804	9:01:16	114.28	31.9681	165	30	4.002	B	12.24
1870	3864B04A0	20140804	8:01:13	114.279	31.9682	105	27	4.007	B	13.12
1871	3864B04A0	20140804	7:02:04	114.28	31.9681	164	26	4.01	C	25.23
1872	3864B04A0	20140804	6:00:51	114.28	31.968	85	22	4.011	B	20.44
1873	3864B04A0	20140804	5:00:37	114.279	31.9681	103	22	4.012	A	39.71
1874	3864B04A0	20140804	4:00:29	114.279	31.968	93	22.24	4.012	A	21.03
1875	3864B04A0	20140804	3:00:52	114.28	31.968	123	22.24	4.014	B	7.73
1876	3864B04A0	20140804	2:00:57	114.279	31.968	96	23	4.015	B	20.54
1877	3864B04A0	20140804	1:00:38	114.279	31.968	103	22.24	4.016	A	11.1
1878	3864B04A0	20140804	0:00:52	114.28	31.9681	150	23	4.018	B	1.61
1879	3864B04A0	20140803	23:00:32	114.28	31.9679	137	23	4.018	A	17.61
1880	3864B04A0	20140803	22:00:28	114.28	31.968	132	23	4.019	A	5.16
1881	3864B04A0	20140803	21:00:52	114.28	31.9681	125	23.24	4.02	B	1.83
1882	3864B04A0	20140803	20:01:22	114.279	31.968	123	24	4.023	B	13.28
1883	3864B04A0	20140803	19:00:42	114.279	31.9682	91	26	4.024	A	38.87
1884	3864B04A0	20140803	18:00:46	114.279	31.968	101	32	4.025	B	19.35
1885	3864B04A0	20140803	17:00:41	114.279	31.968	118	32.24	4.023	A	8.29
1886	3864B04A0	20140803	16:01:28	114.28	31.9681	128	29.24	4.022	B	28.02
1887	3864B04A0	20140803	15:00:41	114.279	31.968	178	28.24	4.021	A	40.36
1888	3864B04A0	20140803	14:00:51	114.279	31.9681	120	28.24	4.022	B	11.09
1889	3864B04A0	20140803	13:00:40	114.279	31.9679	127	30	4.023	A	17.92
1890	3864B04A0	20140803	12:00:44	114.279	31.9681	93	30	4.018	A	28.24
1891	3864B04A0	20140803	11:01:16	114.28	31.9679	123	34.24	4.015	B	16.22
1892	3864B04A0	20140803	10:00:44	114.28	31.968	111	30.24	4.006	A	11.73
1893	3864B04A0	20140803	9:01:29	114.279	31.9676	84	31	3.999	B	56.8
1894	3864B04A0	20140803	8:01:51	114.279	31.9681	128	28.24	4.004	C	11.21
1895	3864B04A0	20140803	7:01:30	114.28	31.968	189	24.24	4.003	B	33.1
1896	3864B04A0	20140803	6:00:42	114.279	31.9681	109	21	4.003	A	32.09
1897	3864B04A0	20140803	5:00:35	114.279	31.968	82	21.24	4.004	A	24.48
1898	3864B04A0	20140803	4:00:28	114.279	31.9681	126	21	4.005	A	28.28
1899	3864B04A0	20140803	3:00:34	114.279	31.9681	118	21	4.005	A	16.8
1900	3864B04A0	20140803	2:00:52	114.279	31.9682	95	22.24	4.007	B	19.81
1901	3864B04A0	20140803	1:00:48	114.279	31.9681	138	22	4.008	B	19.33
1902	3864B04A0	20140803	0:01:02	114.279	31.9681	156	22.24	4.009	B	20.81
1903	3864B04A0	20140802	23:00:39	114.279	31.968	136	22	4.01	A	17.92
1904	3864B04A0	20140802	22:00:46	114.279	31.968	147	22.24	4.012	B	13.96
1905	3864B04A0	20140802	21:00:53	114.279	31.968	163	23	4.013	B	15.75
1906	3864B04A0	20140802	20:00:42	114.279	31.9683	89	23	4.014	A	34.99
1907	3864B04A0	20140802	19:00:37	114.279	31.968	98	24.24	4.015	A	30.79
1908	3864B04A0	20140802	18:00:37	114.279	31.9682	113	27	4.016	A	18.7
1909	3864B04A0	20140802	17:00:34	114.279	31.9682	137	24.24	4.017	A	21.93
1910	3864B04A0	20140802	16:01:43	114.279	31.9676	82	23	4.017	C	51.84
1911	3864B04A0	20140802	15:02:44	114.28	31.9681	146	30.24	4.021	C	16.4
1912	3864B04A0	20140802	14:00:44	114.279	31.9681	133	32	4.016	A	15.16
1913	3864B04A0	20140802	13:01:16	114.279	31.968	121	28.24	4.014	B	13.96
1914	3864B04A0	20140802	12:00:59	114.28	31.9679	133	32.24	4.012	B	17.44
1915	3864B04A0	20140802	11:01:17	114.279	31.968	138	35	4.009	B	17.27
1916	3864B04A0	20140802	10:00:52	114.279	31.9679	122	33	3.998	B	20.86
1917	3864B04A0	20140802	9:01:22	114.279	31.968	115	28	3.995	B	17.58
1918	3864B04A0	20140802	8:01:18	114.279	31.968	133	25.24	4	B	11.1
1919	3864B04A0	20140802	7:00:47	114.28	31.968	126	23.24	4.001	B	25.95
1920	3864B04A0	20140802	6:00:54	114.279	31.9678	151	22.24	4.002	B	25.52
1921	3864B04A0	20140802	5:00:46	114.279	31.9679	105	23	4.002	B	20.87
1922	3864B04A0	20140802	4:00:29	114.279	31.9681	98	22.24	4.003	A	28.38
1923	3864B04A0	20140802	3:00:35	114.279	31.968	112	23	4.004	A	19.03
1924	3864B04A0	20140802	2:00:52	114.279	31.968	150	22.24	4.005	B	17.56
1925	3864B04A0	20140802	1:00:34	114.279	31.9678	131	23	4.006	A	27.39
1926	3864B04A0	20140802	0:00:51	114.279	31.968	122	23	4.007	B	13.07
1927	3864B04A0	20140801	23:00:52	114.279	31.9678	136	22	4.008	B	32.19
1928	3864B04A0	20140801	22:00:40	114.28	31.968	140	22	4.009	A	11.73
1929	3864B04A0	20140801	21:00:52	114.279	31.968	144	22.24	4.011	B	13.28
1930	3864B04A0	20140801	20:00:55	114.279	31.9679	131	23	4.012	B	19.99
1931	3864B04A0	20140801	19:01:10	114.279	31.9682	97	24.24	4.014	B	25.34
1932	3864B04A0	20140801	18:00:51	114.28	31.9678	103	23.24	4.015	B	35.43
1933	3864B04A0	20140801	17:01:16	114.28	31.968	178	24	4.017	B	33.9
1934	3864B04A0	20140801	16:00:43	114.28	31.9679	86	25	4.019	A	25.91
1935	3864B04A0	20140801	15:01:11	114.279	31.9678	55	29	4.021	B	33.86
1936	3864B04A0	20140801	14:01:16	114.279	31.9682	111	33.24	4.019	B	13.21
1937	3864B04A0	20140801	13:00:58	114.279	31.9687	108	30.24	4.016	B	86.35
1938	3864B04A0	20140801	12:00:52	114.279	31.9682	116	27.24	4.014	B	16.02
1939	3864B04A0	20140801	11:00:35	114.279	31.9681	116	31	4.012	A	7.81
1940	3864B04A0	20140801	10:01:05	114.279	31.9681	119	29.24	4.009	B	7.26
1941	3864B04A0	20140801	9:02:10	114.28	31.9681	111	29	4.008	C	27.53
1942	3864B04A0	20140801	8:01:09	114.28	31.9682	100	24	4.011	B	36.08
1943	3864B04A0	20140801	7:00:42	114.28	31.9681	138	23	4.012	A	29.14
1944	3864B04A0	20140801	6:01:12	114.279	31.968	126	22	4.013	B	22.14
1945	3864B04A0	20140801	5:00:54	114.28	31.9679	181	22.24	4.015	B	44.91
1946	3864B04A0	20140801	4:00:51	114.28	31.968	145	22	4.016	B	6.67
1947	3864B04A0	20140801	3:00:52	114.279	31.968	128	21.24	4.017	B	10.5
1948	3864B04A0	20140801	2:01:22	114.279	31.968	95	22	4.019	B	14.41
1949	3864B04A0	20140801	1:00:51	114.279	31.968	122	22.24	4.021	B	17.14
1950	3864B04A0	20140801	0:00:52	114.279	31.9681	133	22	4.022	B	9.54
1951	3864B04A0	20140731	23:00:37	114.279	31.9681	114	22.24	4.023	A	20.81
1952	3864B04A0	20140731	22:00:37	114.28	31.9681	162	22.24	4.024	A	9.93
1953	3864B04A0	20140731	21:00:52	114.279	31.968	159	23.24	4.026	B	10
1954	3864B04A0	20140731	20:00:35	114.279	31.9681	131	23	4.027	A	11.44
1955	3864B04A0	20140731	19:00:51	114.279	31.9679	112	25	4.028	B	19.16
1956	3864B04A0	20140731	18:00:51	114.28	31.9679	117	26.24	4.03	B	19.83
1957	3864B04A0	20140731	17:00:35	114.28	31.968	146	28.24	4.031	A	17.56
1958	3864B04A0	20140731	16:00:53	114.279	31.9679	85	22	4.029	B	29.91
1959	3864B04A0	20140731	15:00:53	114.279	31.9682	116	22	4.03	B	20.69
1960	3864B04A0	20140731	14:02:16	114.28	31.9683	112	33.24	4.029	C	26.52
1961	3864B04A0	20140731	13:00:38	114.279	31.9683	98	32.24	4.021	A	39.93
1962	3864B04A0	20140731	12:01:41	114.279	31.9681	121	34.24	4.016	C	11.07
1963	3864B04A0	20140731	11:02:08	114.279	31.9678	129	35	4.015	C	33.55
1964	3864B04A0	20140731	10:00:42	114.28	31.968	103	32.24	4.009	A	14.31
1965	3864B04A0	20140731	9:01:40	114.279	31.9683	122	28.24	4.006	C	21.27
1966	3864B04A0	20140731	8:02:46	114.28	31.9679	125	24.24	4.014	C	22.05
1967	3864B04A0	20140731	7:01:16	114.279	31.9681	133	23	4.014	B	28.29
1968	3864B04A0	20140731	6:00:54	114.279	31.968	175	22	4.015	B	15.42
1969	3864B04A0	20140731	5:00:51	114.279	31.9679	96	22	4.017	B	23.8
1970	3864B04A0	20140731	4:00:29	114.28	31.968	138	22	4.017	A	13.18
1971	3864B04A0	20140731	3:00:36	114.279	31.9679	127	22	4.018	A	22.2
1972	3864B04A0	20140731	2:00:35	114.279	31.9679	148	22	4.019	A	16.13
1973	3864B04A0	20140731	1:00:30	114.28	31.9679	132	21	4.019	A	22.3
1974	3864B04A0	20140731	0:00:39	114.28	31.968	120	21.24	4.02	A	10.9
1975	3864B04A0	20140730	23:00:52	114.279	31.9679	100	22	4.022	B	20.41
1976	3864B04A0	20140730	22:00:38	114.28	31.968	131	21	4.023	A	11.68
1977	3864B04A0	20140730	21:00:52	114.28	31.9679	165	20.24	4.024	B	21.82
1978	3864B04A0	20140730	20:00:34	114.279	31.9679	117	21.24	4.025	A	23.66
1979	3864B04A0	20140730	19:00:52	114.28	31.9679	124	24	4.027	B	16.5
1980	3864B04A0	20140730	18:00:57	114.28	31.968	107	24.24	4.029	B	6.28
1981	3864B04A0	20140730	17:00:51	114.279	31.968	146	28	4.03	B	14.41
1982	3864B04A0	20140730	16:01:06	114.279	31.9679	121	34.24	4.032	B	15.6
1983	3864B04A0	20140730	15:01:03	114.279	31.9681	109	34.24	4.03	B	11.44
1984	3864B04A0	20140730	14:00:32	114.279	31.9682	82	32	4.025	A	21.93
1985	3864B04A0	20140730	13:00:52	114.28	31.968	146	34	4.02	B	5.82
1986	3864B04A0	20140730	12:01:29	114.279	31.968	109	31	4.013	B	19.75
1987	3864B04A0	20140730	11:00:47	114.279	31.9682	101	32.24	4.013	B	13.95
1988	3864B04A0	20140730	10:00:52	114.28	31.9679	111	31	4.004	B	17.2
1989	3864B04A0	20140730	9:02:04	114.279	31.9675	86	33	4.001	C	70.34
1990	3864B04A0	20140730	8:01:15	114.279	31.968	160	27	4.007	B	15.75
1991	3864B04A0	20140730	7:00:57	114.279	31.9679	116	24.24	4.005	B	19.16
1992	3864B04A0	20140730	6:00:42	114.279	31.968	128	23.24	4.006	A	22.76
1993	3864B04A0	20140730	5:00:37	114.279	31.9681	125	23.24	4.007	A	16.79
1994	3864B04A0	20140730	4:00:29	114.279	31.968	128	23.24	4.007	A	19.35
1995	3864B04A0	20140730	3:00:52	114.279	31.968	126	24	4.009	B	16.15
1996	3864B04A0	20140730	2:00:52	114.279	31.968	109	24.24	4.01	B	29.19
1997	3864B04A0	20140730	1:01:52	114.279	31.968	92	25	4.013	C	23.24
1998	3864B04A0	20140730	0:00:53	114.279	31.9682	109	24	4.014	B	29.26
1999	3864B04A0	20140729	23:01:17	114.279	31.968	79	25	4.016	B	20.99
2000	3864B04A0	20140729	22:00:52	114.279	31.968	120	24.24	4.017	B	19.93
2001	3864B04A0	20140729	21:01:22	114.279	31.9678	143	25	4.02	B	39.37
2002	3864B04A0	20140729	20:01:24	114.279	31.9681	120	25	4.022	B	26.39
2003	3864B04A0	20140729	19:00:52	114.279	31.9682	116	26	4.023	B	18.72
2004	3864B04A0	20140729	18:00:35	114.279	31.9682	54	28	4.024	A	13.96
2005	3864B04A0	20140729	17:01:16	114.28	31.9681	118	28.24	4.025	B	2.93
[truncated: 763 more rows]
